# Supplementary material for: Common Trajectories of Highly Effective CD19-Specific CAR T Cells Identified by Endogenous T-cell Receptor Lineages
Source: Oxford University Press journal article supplement (doi:10.1158/2159-8290.cd-21-1508), 2022-07-06
Supplement: cd-21-1508_supplementary_tables_s1-s7_suppst1-st7.xlsx [file cd-21-1508_supplementary_tables_s1-s7_suppst1-st7.xlsx]

## Sheet: TableS1
Supplementary Table 1. CAR+ T cells sequenced per patient and collection time point.
Patient	Pre-infusion	Post infusion
	GMP Product	Week 1	Week 2	Week 3	Week 4	Week 8	Month 3	Month 6
0	1341
1	1885
2	8568	261	830	84	61
3	8222	169	146	1	4
4	12280	340	1220	459	434	5
5	11988	9510	1027	672	321	114	355	7
6	8461	144	1444	556	279	5	13
7	7607	36	39	26	38	11
8	14840	971	1069	1273	2165	251
9	11221	136	2974	874	184
10	10960	1568	4389	1705	851	1149
11	12218	2427	1940	5234	1146
12	4339	190
13	4819
14		2855	386	2372	21
15		2478	2148	3143	58
Black colored boxes indicate samples were not available for analysis. Grey indicates patients that
were excluded from GMP-post infusion lineage tracing analysis due to data limitations.

## Sheet: TableS2
Supplementary Table 2. CD19 CAR/ml of blood by week post infusion, as assessed by qPCR,
for patients 1 through 15.
Patient	Week 1	Week 2	Week 3	Week 4	Week 8	Month 3	Month 6
1	9341	82939	6414	6677
2	296787	561988	149865	51570	1374
3	947250	254181	16461	958	1003
4	24967	2165026	421573	121406	3801	4209
5	1122227	254016	31556	36746	114889	174431	0
6	50700	3369685	894403	376926	17141	2970	2905
7	7561	16755	76891	8432	872
8	314646	569687	321331	91583	89693
9	268449	5732386	2328662	339582
10	1960334	2024664	578331	27864	139449
11	236747	2825332	1621885	168308
12	66126
13	49091	17544341	4843874	1740770
14	1640116	69673	471052	2238
15	395350	520669	81407	7298	10025
Grey colored boxes indicate time points with unavailable data. Bolded numbers correspond to
peak expansion values for each patient.

## Sheet: TableS3
Supplementary Table 3. Percentage of CAR T cell clusters making up each sample time point.
Sample	Cluster 0	Cluster 1	Cluster 2	Cluster 3	Cluster 4	Cluster 5	Cluster 6	Cluster 7	Cluster 8	Cluster 9	Cluster 10	Cluster 11	Cluster 12	Cluster 13	Cluster 14	Cluster 15	Cluster 16	Cluster 17	Cluster 18	Cluster 19	Cluster 20	Cluster 21
GMP	0.136	0.129	0.08	0.003	0.051	0.09	0.056	0.076	0	0.056	0.066	0.059	0.062	0.002	0.003	0.05	0.007	0.025	0.029	0.02	0.001	0.001
Wk1	0.025	0.029	0.106	0.054	0.313	0.049	0.067	0.007	0.015	0.052	0.003	0.02	0.001	0.063	0.019	0	0.12	0.038	0	0.004	0.015	0.001
Wk2	0.008	0.007	0.064	0.29	0.01	0.009	0.028	0.003	0.237	0.017	0.001	0.01	0	0.071	0.123	0	0.074	0.009	0.001	0.002	0.036	0
Wk3	0.002	0.009	0.088	0.33	0.003	0.011	0.037	0.002	0.155	0.004	0	0.003	0	0.144	0.119	0	0.022	0.016	0.001	0.002	0.054	0
Wk4	0.005	0.003	0.128	0.306	0.014	0.005	0.04	0.001	0.184	0.008	0.001	0.004	0	0.076	0.184	0	0.021	0.005	0.001	0.001	0.012	0
Wk8	0	0.005	0.099	0.212	0.005	0.016	0.04	0.003	0.078	0.005	0	0.003	0	0.368	0.076	0	0.02	0.033	0.001	0.002	0.036	0
3mo	0	0.008	0.068	0.277	0.011	0.011	0.054	0.022	0	0.011	0.003	0.003	0	0.342	0.128	0	0.043	0.014	0	0	0.005	0

## Sheet: TableS4
Supplementary Table 4. Differentially expressed genes between cluster 3 and cluster 8. Pct.1 corresponds to the percentage of cells in cluster 3 expressing a gene, and pct.2 corresponds to the percentage of cells in cluster 8 expressing a gene.
Gene	p_val	avg_log2FC	pct.1	pct.2	p_val_adj
GZMK	0	3.31448	0.888	0.157	0
LTB	0	1.89762	0.895	0.515	0
CD74	0	1.30443	0.995	0.947	0
VIM	0	1.16944	0.952	0.728	0
CMC1	0	1.13202	0.456	0.172	0
FXYD2	0	0.923934	0.242	0.01	0
CXCR6	0	0.887554	0.476	0.161	0
NFKBIA	1.96145e-262	0.860761	0.599	0.389	5.10918e-258
COTL1	0	0.849727	0.733	0.492	0
RPS26	0	0.818714	0.993	0.994	0
CNN2	0	0.813728	0.952	0.824	0
HLA-DRB5	0	0.734684	0.427	0.169	0
HLA-DRB1	0	0.729786	0.666	0.381	0
CXCR3	0	0.70748	0.596	0.274	0
JUN	2.63733e-234	0.678283	0.55	0.327	6.86972e-230
HLA-DRA	1.509e-303	0.662815	0.423	0.182	3.93065e-299
DENND2D	0	0.602266	0.686	0.435	0
HLA-DPA1	1.13751e-259	0.544673	0.645	0.407	2.96299e-255
SPOCK2	0	0.535973	0.653	0.358	0
AQP3	0	0.526277	0.211	0.029	0
TCF7	0	0.517934	0.245	0.035	0
HLA-DMA	0	0.50492	0.347	0.105	0
RGS1	4.73039e-268	0.502515	0.339	0.125	1.23217e-263
RPS4Y1	2.16123e-123	0.488023	0.449	0.295	5.62956e-119
SELL	2.49255e-177	0.469834	0.576	0.374	6.4926e-173
RPLP0	0	0.454264	0.995	0.994	0
CD82	1.78367e-225	0.453897	0.569	0.329	4.64609e-221
PLP2	1.63626e-247	0.453203	0.449	0.215	4.26213e-243
CD28	0	0.452278	0.245	0.027	0
RPL12	0	0.446665	0.998	0.999	0
LIMS1	2.76069e-239	0.444964	0.505	0.264	7.19105e-235
SIRPG	3.11847e-193	0.435144	0.608	0.379	8.12299e-189
CHI3L2	4.10911e-207	0.431908	0.341	0.148	1.07034e-202
CD27	1.21461e-224	0.431115	0.926	0.842	3.16382e-220
CKLF	7.19488e-179	0.421078	0.525	0.313	1.87412e-174
RPL13	0	0.413462	0.999	1	0
ALOX5AP	1.56045e-214	0.409927	0.248	0.079	4.06466e-210
NR4A2	8.40126e-125	0.40534	0.322	0.173	2.18836e-120
RPS12	0	0.398434	0.999	1	0
PABPC1	2.34954e-238	0.39681	0.939	0.888	6.12009e-234
LAG3	9.47591e-53	0.396774	0.639	0.525	2.46829e-48
PECAM1	4.95894e-216	0.388496	0.389	0.177	1.29171e-211
FOS	2.13025e-116	0.387385	0.244	0.117	5.54887e-112
JUNB	1.10375e-97	0.386412	0.948	0.918	2.87506e-93
CTSA	5.812e-153	0.384192	0.405	0.221	1.51391e-148
RPS8	0	0.370484	0.999	1	0
EOMES	5.14196e-191	0.370056	0.303	0.127	1.33938e-186
CORO1B	1.13471e-147	0.366757	0.495	0.302	2.9557e-143
RPL5	0	0.364089	0.993	0.994	0
RPS15A	0	0.362011	1	1	0
GALM	6.73099e-206	0.353548	0.339	0.143	1.75329e-201
RPL18A	0	0.353471	0.998	0.999	0
CD69	6.66839e-126	0.351264	0.693	0.517	1.73698e-121
ZFAS1	3.34862e-150	0.349877	0.625	0.428	8.72249e-146
CXCR4	3.75939e-113	0.34835	0.582	0.407	9.79246e-109
FLT3LG	8.19878e-125	0.347897	0.521	0.351	2.13562e-120
TRADD	2.03085e-152	0.347027	0.561	0.358	5.28996e-148
MCUB	3.018e-150	0.346353	0.646	0.442	7.86129e-146
RPL28	0	0.342044	1	1	0
CYTOR	3.93038e-108	0.339415	0.787	0.653	1.02379e-103
RHOH	1.59451e-121	0.33594	0.666	0.481	4.15337e-117
HLA-DPB1	2.55799e-120	0.33353	0.688	0.513	6.66305e-116
RPL39	0	0.33148	0.998	0.999	0
RPL36	0	0.331375	0.996	0.997	0
TIMD4	1.59076e-111	0.330773	0.342	0.197	4.14361e-107
RPS28	0	0.329552	0.999	1	0
RPS23	0	0.324802	0.998	0.999	0
RPL14	0	0.324398	0.997	0.999	0
RPS13	0	0.323598	0.998	0.999	0
RPSA	0	0.322808	0.993	0.996	0
SOCS3	8.02751e-174	0.322531	0.214	0.071	2.09101e-169
RPL8	0	0.32121	0.996	0.998	0
HINT1	5.6941e-238	0.320571	0.965	0.937	1.4832e-233
RPS5	7.15234e-301	0.314243	0.989	0.991	1.86304e-296
LIME1	4.7156e-125	0.313308	0.784	0.614	1.22832e-120
ELOVL5	2.68807e-147	0.308945	0.464	0.266	7.00189e-143
TNFRSF9	1.17713e-168	0.307003	0.222	0.078	3.0662e-164
GYPC	2.49767e-141	0.306589	0.872	0.759	6.50592e-137
RPL30	0	0.306015	0.999	1	0
RPS21	0	0.30563	0.996	0.998	0
RPS25	0	0.305135	0.996	0.997	0
RNF214	6.87809e-171	0.304907	0.263	0.104	1.79161e-166
RPL11	0	0.304301	0.999	1	0
SNHG8	1.09206e-121	0.304036	0.483	0.301	2.84461e-117
STK17A	1.71512e-101	0.303762	0.733	0.579	4.46755e-97
NFKBIZ	9.10172e-156	0.303418	0.303	0.138	2.37082e-151
RPS18	6.34088e-268	0.30034	0.996	0.998	1.65167e-263
RPL19	0	0.299605	0.999	1	0
EIF3H	1.07808e-135	0.299565	0.831	0.716	2.80819e-131
IL7R	4.03796e-63	0.297235	0.264	0.164	1.05181e-58
TPT1	3.91112e-299	0.295748	0.998	0.999	1.01877e-294
EEF1B2	1.49327e-148	0.294854	0.961	0.943	3.88967e-144
SLC25A6	1.43856e-191	0.294569	0.95	0.908	3.74716e-187
RACK1	0	0.294202	0.995	0.996	0
SLF1	6.59841e-131	0.293684	0.334	0.175	1.71875e-126
FABP5	2.42757e-132	0.291709	0.373	0.203	6.32334e-128
FAS	3.7139e-163	0.289319	0.32	0.146	9.67397e-159
RPL32	0	0.285878	0.999	1	0
RPL18	0	0.28503	0.998	0.999	0
NOSIP	2.85228e-77	0.281617	0.799	0.699	7.42961e-73
HMOX1	4.68454e-101	0.281092	0.217	0.104	1.22023e-96
PLEC	2.84856e-117	0.280597	0.285	0.143	7.41992e-113
PTPRCAP	9.88988e-93	0.280398	0.797	0.663	2.57612e-88
CMTM7	2.29501e-127	0.279732	0.431	0.248	5.97804e-123
RPL10	0	0.279209	1	1	0
AIF1	4.36429e-142	0.277506	0.212	0.081	1.13681e-137
RPL35A	0	0.276612	0.997	0.999	0
RPS7	0	0.27642	0.999	1	0
DUSP1	2.78043e-66	0.275996	0.449	0.32	7.24247e-62
HNRNPLL	7.13555e-136	0.275426	0.3	0.145	1.85867e-131
CCR5	1.81495e-146	0.274494	0.212	0.08	4.72757e-142
LDHB	1.08706e-145	0.273838	0.927	0.885	2.83159e-141
EEF2	2.23465e-185	0.273184	0.975	0.966	5.82082e-181
AL138963.3	3.3137e-38	0.271415	0.253	0.173	8.63154e-34
RPS15	0	0.271186	0.999	0.999	0
MCM5	1.63026e-98	0.270187	0.317	0.181	4.24649e-94
EEF1A1	0	0.269831	1	1	0
HDAC7	3.82426e-139	0.267564	0.326	0.161	9.96144e-135
SH2D1A	2.23739e-75	0.266989	0.613	0.463	5.82794e-71
ACAP1	1.03063e-108	0.266737	0.83	0.698	2.68459e-104
TNFSF10	2.10247e-105	0.264072	0.408	0.244	5.47652e-101
EEF1D	8.51277e-239	0.263585	0.991	0.99	2.21741e-234
RPL34	0	0.262916	0.999	1	0
DGKA	6.41608e-131	0.259689	0.352	0.184	1.67126e-126
ATP5MG	9.96609e-175	0.25526	0.969	0.956	2.59597e-170
ITM2A	6.8004e-87	0.254491	0.526	0.369	1.77137e-82
SMDT1	3.15033e-83	0.253075	0.654	0.494	8.20597e-79
NUCB2	1.88403e-75	0.249575	0.439	0.297	4.90753e-71
SERP1	8.0147e-85	0.246015	0.745	0.603	2.08767e-80
RPL41	0	0.245953	1	1	0
OCIAD2	4.76001e-92	0.245698	0.614	0.432	1.23989e-87
RPL37	4.17027e-296	0.245398	0.997	1	1.08627e-291
BTF3	4.81985e-189	0.245359	0.981	0.976	1.25547e-184
RPL4	1.16909e-141	0.244988	0.971	0.963	3.04525e-137
HMGA1	8.75049e-91	0.244609	0.411	0.257	2.27933e-86
CD70	9.16951e-80	0.243912	0.247	0.138	2.38847e-75
DNPH1	5.35777e-121	0.243841	0.375	0.206	1.39559e-116
PPA1	4.80854e-85	0.241588	0.482	0.322	1.25253e-80
RPS29	9.41761e-80	0.240346	0.987	0.991	2.4531e-75
RPL22	3.33996e-173	0.239627	0.988	0.987	8.69992e-169
BIN1	2.42987e-87	0.238139	0.77	0.627	6.32932e-83
INPP4B	2.70068e-120	0.237091	0.285	0.139	7.03472e-116
RPS24	0	0.23554	0.999	0.999	0
NPDC1	2.57168e-67	0.23439	0.402	0.273	6.69872e-63
RPL7A	1.95726e-289	0.234351	0.999	1	5.09828e-285
FCMR	3.55732e-62	0.234244	0.622	0.478	9.2661e-58
EIF3G	5.5985e-99	0.233893	0.878	0.785	1.4583e-94
RGL4	1.78591e-121	0.23371	0.276	0.133	4.65195e-117
RPL29	5.38441e-267	0.233077	0.998	0.999	1.40253e-262
MT2A	4.69196e-79	0.231966	0.824	0.705	1.22216e-74
CD7	4.49094e-32	0.230518	0.878	0.86	1.1698e-27
ISG20	1.09397e-38	0.230119	0.838	0.759	2.84957e-34
RPL24	3.94102e-217	0.229125	0.992	0.994	1.02656e-212
RPLP2	2.02096e-224	0.2268	0.998	0.999	5.26421e-220
RPLP1	7.77796e-281	0.226605	1	1	2.026e-276
RPS19	2.29889e-188	0.226171	0.999	0.999	5.98814e-184
SIT1	1.57096e-58	0.225261	0.777	0.669	4.09203e-54
CBLB	1.26731e-56	0.224725	0.632	0.485	3.30108e-52
RPS16	1.15221e-181	0.224306	0.991	0.995	3.00128e-177
EIF1	4.05145e-174	0.223671	0.993	0.995	1.05532e-169
LYAR	1.30113e-40	0.221702	0.724	0.628	3.38918e-36
TOX	1.19097e-112	0.220112	0.223	0.099	3.10225e-108
CDC25B	2.22627e-62	0.219916	0.748	0.609	5.79898e-58
GRK6	3.24382e-77	0.219274	0.413	0.268	8.44951e-73
FYB1	5.00395e-63	0.219053	0.805	0.72	1.30343e-58
SAT1	1.47481e-37	0.219052	0.715	0.609	3.84158e-33
GATA3	5.88502e-81	0.216065	0.4	0.254	1.53293e-76
TRAF1	3.7073e-113	0.21598	0.238	0.11	9.65678e-109
C12orf57	7.74755e-62	0.215332	0.919	0.866	2.01808e-57
PAG1	8.11891e-89	0.21504	0.41	0.254	2.11481e-84
RPL6	1.15086e-235	0.214788	0.998	0.999	2.99775e-231
LDLRAP1	1.10612e-122	0.213637	0.216	0.09	2.88123e-118
FAU	4.41078e-264	0.212468	0.998	1	1.14892e-259
RPS6	3.1185e-148	0.208533	0.995	0.998	8.12307e-144
RPL10A	7.73238e-122	0.208454	0.987	0.991	2.01413e-117
AKIRIN1	1.12963e-87	0.207206	0.382	0.23	2.94245e-83
RPS3A	4.13086e-171	0.205866	0.998	0.999	1.07601e-166
SYNRG	1.84401e-65	0.205399	0.559	0.402	4.80329e-61
CD81	6.4262e-77	0.205142	0.361	0.225	1.6739e-72
PIM2	2.37147e-62	0.204023	0.456	0.319	6.17721e-58
NAP1L1	4.74123e-58	0.203804	0.625	0.481	1.23499e-53
DUSP2	1.24574e-21	0.202992	0.871	0.817	3.24492e-17
SLC25A5	1.75269e-56	0.202979	0.832	0.744	4.5654e-52
LINC01871	5.03016e-84	0.201589	0.447	0.292	1.31026e-79
RPL15	2.37072e-186	0.199515	0.995	0.998	6.17525e-182
PTMS	2.5106e-22	0.199482	0.494	0.406	6.53961e-18
COX7C	8.16942e-117	0.198606	0.969	0.957	2.12797e-112
LSM2	2.53466e-65	0.19735	0.522	0.367	6.60228e-61
TNFAIP8	9.54349e-67	0.195574	0.505	0.351	2.48589e-62
ANXA5	1.0007e-49	0.195119	0.748	0.63	2.60663e-45
NOP53	2.03196e-57	0.194882	0.852	0.772	5.29285e-53
EIF3F	5.83923e-85	0.194859	0.914	0.871	1.521e-80
COMMD6	1.75711e-83	0.192093	0.935	0.889	4.57691e-79
TENT5C	2.49233e-60	0.191095	0.369	0.245	6.49203e-56
TRAF5	1.182e-84	0.190784	0.29	0.163	3.07888e-80
SPTBN1	1.49106e-70	0.190528	0.381	0.244	3.88392e-66
R3HDM4	4.58976e-62	0.189951	0.527	0.372	1.19554e-57
PBXIP1	4.13252e-56	0.189597	0.511	0.368	1.07644e-51
FXYD5	2.64367e-58	0.18934	0.933	0.898	6.88623e-54
DARS	2.09021e-82	0.188493	0.368	0.223	5.44457e-78
RPS14	6.6401e-185	0.186828	0.999	1	1.72961e-180
DNAJC4	1.09579e-80	0.186471	0.348	0.208	2.85431e-76
DBN1	1.77565e-61	0.185032	0.218	0.126	4.62521e-57
PSTPIP1	1.17238e-57	0.183954	0.578	0.425	3.05381e-53
RPL9	9.01297e-88	0.183245	0.989	0.992	2.3477e-83
H1FX	3.74955e-55	0.18124	0.367	0.248	9.76682e-51
ACP5	1.59926e-59	0.180934	0.426	0.289	4.16575e-55
ARHGAP45	1.02719e-47	0.180868	0.695	0.557	2.67563e-43
ERP29	8.33254e-61	0.180773	0.843	0.757	2.17046e-56
IL16	3.89907e-48	0.180688	0.662	0.525	1.01563e-43
PMAIP1	3.07861e-71	0.180555	0.219	0.119	8.01917e-67
RPL17	7.15493e-47	0.17803	0.807	0.712	1.86372e-42
EIF3E	5.84375e-52	0.177453	0.743	0.63	1.52218e-47
TOMM7	3.25682e-74	0.176837	0.953	0.923	8.48337e-70
EIF3K	3.29392e-72	0.175872	0.942	0.91	8.58e-68
CARHSP1	4.48418e-57	0.174117	0.466	0.325	1.16804e-52
MT-CYB	6.82966e-92	0.173553	0.995	0.996	1.77899e-87
TIGIT	3.43421e-65	0.172777	0.478	0.334	8.94543e-61
RPS27	1.22545e-112	0.172065	0.999	1	3.19204e-108
RPS27A	2.16514e-156	0.170395	0.999	1	5.63976e-152
ZFP36L2	4.80109e-30	0.169541	0.938	0.931	1.25059e-25
ADSL	3.34783e-74	0.168589	0.357	0.218	8.72042e-70
CD84	2.28568e-79	0.168071	0.291	0.167	5.95374e-75
SNAP47	2.65409e-65	0.167954	0.269	0.16	6.91339e-61
STAT5A	1.8043e-96	0.166723	0.206	0.094	4.69984e-92
PDCD4	7.69258e-56	0.166649	0.411	0.281	2.00376e-51
MT-ND2	3.28135e-45	0.16616	0.924	0.894	8.54725e-41
RPS9	2.8573e-84	0.166092	0.987	0.99	7.44269e-80
PARK7	2.00541e-46	0.164396	0.887	0.823	5.2237e-42
CALM3	4.98063e-39	0.16292	0.777	0.678	1.29736e-34
CUTA	8.24026e-40	0.162871	0.782	0.677	2.14642e-35
NDUFS5	2.56515e-40	0.162571	0.81	0.717	6.68171e-36
ATP5MC2	2.84816e-62	0.162118	0.968	0.965	7.41888e-58
BTG1	3.5935e-31	0.16183	0.931	0.912	9.36036e-27
EIF4B	5.1397e-41	0.161749	0.693	0.566	1.33879e-36
RPL36AL	4.29173e-77	0.161265	0.983	0.982	1.11791e-72
MGAT4A	1.02088e-40	0.160549	0.478	0.355	2.65918e-36
RPL13A	1.90628e-46	0.160508	0.986	0.985	4.96547e-42
NPM1	1.46688e-66	0.160144	0.948	0.932	3.82093e-62
RPS3	7.53951e-166	0.159777	0.999	1	1.96389e-161
ZYX	5.96431e-32	0.159656	0.698	0.596	1.55358e-27
MTERF4	4.20252e-68	0.159354	0.316	0.191	1.09467e-63
MPI	3.24868e-84	0.159324	0.224	0.113	8.46217e-80
BLVRA	1.93735e-73	0.158882	0.251	0.139	5.04642e-69
PIK3R1	1.15681e-38	0.158799	0.513	0.385	3.01327e-34
COX5A	2.15868e-32	0.157245	0.82	0.747	5.62292e-28
ANXA2	2.83339e-27	0.156845	0.796	0.717	7.38042e-23
UBASH3A	1.93925e-74	0.15627	0.3	0.175	5.05136e-70
POLR1D	6.80728e-36	0.155934	0.661	0.539	1.77316e-31
PEBP1	1.55514e-41	0.155676	0.609	0.469	4.05084e-37
ZFP36L1	1.34296e-44	0.155057	0.468	0.342	3.49815e-40
TSTD1	3.55643e-37	0.154949	0.551	0.417	9.26378e-33
TRAT1	2.37011e-70	0.154543	0.288	0.17	6.17367e-66
ALKBH7	9.72865e-48	0.154514	0.516	0.374	2.53412e-43
ESD	7.1884e-92	0.153938	0.216	0.103	1.87243e-87
RPS2	5.98177e-21	0.150709	0.988	0.99	1.55813e-16
EIF3L	9.49816e-38	0.150599	0.767	0.664	2.47408e-33
CLPP	5.75232e-45	0.150136	0.519	0.377	1.49836e-40
CASP4	3.83166e-32	0.150112	0.671	0.55	9.98072e-28
CD37	9.34295e-55	0.15	0.951	0.919	2.43365e-50
LYST	2.74337e-46	0.149619	0.619	0.478	7.14594e-42
ABLIM1	1.08962e-64	0.149288	0.281	0.168	2.83825e-60
CHD9	1.67794e-64	0.149201	0.245	0.142	4.37071e-60
ATF7IP2	1.42702e-62	0.148763	0.283	0.17	3.71709e-58
ICAM3	2.15471e-38	0.14848	0.851	0.768	5.61258e-34
SNRPD2	1.81234e-53	0.148023	0.944	0.909	4.72078e-49
RPL7	4.12425e-49	0.1471	0.96	0.948	1.07429e-44
MAP4K1	1.80289e-39	0.14696	0.505	0.373	4.69617e-35
NME2	3.53985e-33	0.146658	0.562	0.442	9.2206e-29
SH3BP1	1.47507e-45	0.146537	0.495	0.359	3.84227e-41
OFD1	7.88926e-61	0.14573	0.323	0.203	2.055e-56
CD44	7.12801e-29	0.145067	0.687	0.581	1.8567e-24
MIF	5.57159e-40	0.144757	0.928	0.893	1.45129e-35
RPS4X	1.1826e-60	0.144457	0.999	1	3.08044e-56
IKBKE	2.71404e-58	0.141297	0.296	0.183	7.06953e-54
SEPT6	4.33198e-33	0.140849	0.738	0.632	1.12839e-28
RPL36A	2.58596e-26	0.1405	0.846	0.791	6.7359e-22
HPRT1	2.1249e-44	0.140491	0.42	0.293	5.53494e-40
MT-CO3	8.29025e-51	0.14043	0.995	0.997	2.15944e-46
CYLD	1.33979e-46	0.138899	0.45	0.322	3.4899e-42
PKM	2.70426e-36	0.13885	0.762	0.652	7.04405e-32
AP3S1	3.26013e-53	0.138125	0.39	0.26	8.49198e-49
GBP4	3.14458e-31	0.138057	0.528	0.412	8.19101e-27
MYL6B	2.31102e-69	0.13795	0.229	0.125	6.01975e-65
PPP1R2	1.13442e-34	0.137397	0.594	0.464	2.95495e-30
CD2	9.12598e-26	0.13739	0.914	0.875	2.37713e-21
EID1	1.13913e-29	0.136979	0.815	0.719	2.9672e-25
UQCRH	9.69267e-30	0.136776	0.787	0.702	2.52475e-25
DCP2	4.96454e-53	0.136598	0.333	0.217	1.29316e-48
H2AFJ	6.85082e-58	0.136436	0.306	0.192	1.7845e-53
LYSMD2	2.25958e-64	0.135474	0.267	0.156	5.88574e-60
SH3BP5	2.53844e-44	0.135391	0.477	0.344	6.61214e-40
GPRIN3	4.54311e-58	0.135242	0.311	0.195	1.18339e-53
FAM177A1	1.36011e-46	0.134398	0.416	0.288	3.5428e-42
IL21R	5.12057e-66	0.134359	0.205	0.11	1.33381e-61
RTRAF	6.58298e-30	0.133579	0.699	0.589	1.71473e-25
DEGS1	8.14147e-51	0.133096	0.339	0.223	2.12069e-46
C4orf48	7.44149e-36	0.13288	0.552	0.42	1.93836e-31
RPL3	1.51142e-47	0.13248	0.991	0.996	3.93694e-43
TCOF1	2.31902e-60	0.131828	0.227	0.131	6.04059e-56
NECAP2	6.12886e-42	0.131326	0.451	0.322	1.59645e-37
ATM	9.36764e-39	0.131074	0.456	0.335	2.44008e-34
JCC-SJCAR19short	1.75137e-06	0.130678	1	1	0.0456197
MT-ND3	7.66983e-22	0.129938	0.989	0.993	1.99784e-17
CCNL1	3.04084e-31	0.12895	0.564	0.439	7.92077e-27
AC026979.2	8.11742e-52	0.128502	0.302	0.194	2.11442e-47
RSL1D1	4.98132e-33	0.128192	0.514	0.389	1.29753e-28
TKT	1.68719e-28	0.12789	0.607	0.484	4.39478e-24
RELB	2.30845e-53	0.127653	0.27	0.168	6.01305e-49
ETFB	2.53472e-64	0.126971	0.29	0.173	6.60243e-60
TBC1D1	1.77768e-53	0.126878	0.283	0.176	4.63049e-49
MT-CO1	6.27076e-55	0.126316	0.998	0.998	1.63341e-50
MAD1L1	1.17993e-34	0.125794	0.518	0.39	3.07349e-30
LGALS9	2.40226e-53	0.125783	0.219	0.129	6.25741e-49
PIM3	3.90647e-42	0.125382	0.274	0.181	1.01756e-37
MAP3K8	2.38768e-39	0.124891	0.285	0.194	6.21942e-35
ALDOA	2.60084e-26	0.123535	0.823	0.733	6.77467e-22
COX4I1	5.14254e-53	0.123529	0.979	0.976	1.33953e-48
GPSM3	1.43179e-31	0.123525	0.938	0.91	3.72951e-27
IGBP1	8.14188e-33	0.123493	0.545	0.416	2.1208e-28
PCBP2	2.56269e-41	0.123406	0.966	0.953	6.6753e-37
CSTB	8.13019e-26	0.120623	0.781	0.68	2.11775e-21
SEM1	1.33682e-19	0.120459	0.736	0.66	3.48215e-15
PSMB4	5.51236e-41	0.120242	0.482	0.35	1.43586e-36
GBP5	5.03145e-14	0.119539	0.75	0.681	1.31059e-09
RHOF	4.06865e-21	0.119294	0.665	0.561	1.0598e-16
UQCRB	3.73765e-36	0.119075	0.941	0.914	9.73583e-32
TRAC	3.83652e-22	0.118706	0.764	0.666	9.99336e-18
CCDC167	1.24263e-31	0.11844	0.434	0.322	3.2368e-27
PRKCB	1.55114e-25	0.117775	0.574	0.458	4.04041e-21
TAF7	2.24014e-45	0.117581	0.422	0.293	5.83511e-41
PLCG1	1.03161e-41	0.116743	0.296	0.199	2.68714e-37
MT-ND1	5.28872e-28	0.116653	0.97	0.973	1.37761e-23
TTC39C	1.59875e-53	0.116402	0.261	0.16	4.16443e-49
CAMK4	1.99071e-35	0.116181	0.423	0.309	5.18539e-31
AC119396.1	2.23059e-34	0.115479	0.357	0.256	5.81025e-30
RPL22L1	2.42094e-33	0.115145	0.493	0.369	6.30605e-29
TOMM20	2.11174e-25	0.115003	0.604	0.485	5.50066e-21
NINJ1	1.02114e-41	0.114672	0.361	0.249	2.65987e-37
C6orf48	1.08139e-55	0.114393	0.269	0.163	2.81682e-51
PPP6R2	1.36995e-33	0.114297	0.363	0.261	3.56846e-29
EIF3M	9.79065e-25	0.113673	0.678	0.566	2.55027e-20
EPB41	4.9754e-29	0.113206	0.525	0.406	1.29599e-24
LINC02084	4.90014e-49	0.111587	0.205	0.122	1.27639e-44
TUT4	7.20148e-42	0.111537	0.305	0.205	1.87584e-37
RPL31	1.30554e-38	0.110965	0.976	0.973	3.40066e-34
NSA2	9.55429e-26	0.110742	0.666	0.55	2.4887e-21
UXT	2.62226e-21	0.110378	0.725	0.62	6.83045e-17
GABARAPL2	1.72895e-19	0.11018	0.684	0.578	4.50357e-15
NACA	5.42145e-59	0.110099	0.995	0.997	1.41218e-54
CCNI	2.15544e-30	0.109719	0.925	0.898	5.61449e-26
OST4	2.59095e-30	0.109657	0.922	0.891	6.74891e-26
C19orf53	4.09352e-20	0.108222	0.766	0.67	1.06628e-15
RPL23A	6.01559e-45	0.107957	0.994	0.997	1.56694e-40
GTF2F1	1.20558e-41	0.106823	0.366	0.25	3.14029e-37
C8orf59	2.66522e-17	0.106617	0.652	0.552	6.94238e-13
PHB2	4.9032e-20	0.106121	0.7	0.594	1.27718e-15
PTRHD1	1.07657e-35	0.105904	0.463	0.339	2.80425e-31
RCSD1	1.01617e-21	0.105674	0.667	0.554	2.64693e-17
MYADM	7.49505e-40	0.105554	0.311	0.213	1.95231e-35
DMAC1	6.89416e-54	0.105356	0.252	0.151	1.79579e-49
MZT2B	4.54593e-17	0.104036	0.557	0.463	1.18412e-12
CCNB1IP1	4.32881e-54	0.10397	0.213	0.123	1.12757e-49
CLDND1	5.05467e-32	0.103937	0.318	0.226	1.31664e-27
EBPL	1.87444e-42	0.103922	0.254	0.163	4.88255e-38
MTHFD2	6.11482e-46	0.103797	0.264	0.168	1.59279e-41
GPR174	2.37393e-44	0.103483	0.266	0.17	6.1836e-40
CCDC57	1.03928e-50	0.103151	0.263	0.163	2.70711e-46
MT-CO2	2.19663e-41	0.102833	0.998	0.998	5.72179e-37
HSP90AB1	1.18348e-16	0.102755	0.799	0.736	3.08272e-12
RIPOR2	1.83935e-18	0.102106	0.793	0.705	4.79115e-14
CHMP7	1.14001e-44	0.102045	0.235	0.147	2.96951e-40
TNFRSF25	3.21053e-55	0.101976	0.243	0.144	8.3628e-51
TMEM243	5.95593e-40	0.101971	0.388	0.269	1.5514e-35
CDKN2D	2.63749e-31	0.101937	0.414	0.304	6.87013e-27
GYG1	1.98466e-40	0.101741	0.345	0.235	5.16964e-36
TMEM256	3.72624e-27	0.101191	0.514	0.394	9.70611e-23
ACOT9	7.16958e-44	0.100301	0.223	0.138	1.86753e-39
FAM173A	4.69974e-27	0.100197	0.327	0.239	1.22419e-22
RBCK1	3.32285e-18	0.100073	0.623	0.519	8.65537e-14
KDM2A	2.14207e-37	0.100032	0.275	0.184	5.57966e-33
SETX	0.555311	-0.100305	0.358	0.323	1
TUBA1B	0.000311992	-0.100436	0.452	0.426	1
UCHL5	0.164861	-0.100531	0.218	0.207	1
LSP1	3.02287e-36	-0.100562	0.975	0.984	7.87397e-32
GBP2	0.307533	-0.100638	0.583	0.523	1
RPN1	3.25982e-08	-0.100684	0.606	0.569	0.000849117
ITPRIP	0.00065933	-0.100833	0.261	0.262	1
PPM1M	0.120003	-0.100884	0.358	0.327	1
ACTR1A	0.0510373	-0.101455	0.356	0.326	1
KANSL1-AS1	0.00821381	-0.101708	0.277	0.27	1
ATP1A1	0.00150065	-0.101776	0.421	0.391	1
TMEM179B	4.82957e-09	-0.101797	0.547	0.519	0.000125801
DOCK11	0.185575	-0.102012	0.266	0.25	1
MARCKSL1	0.337454	-0.102478	0.23	0.217	1
ATP6V0B	1.11194e-14	-0.1025	0.635	0.606	2.89639e-10
SIRT7	0.0927282	-0.10273	0.298	0.277	1
ITGB7	2.76899e-07	-0.103081	0.672	0.633	0.00721267
CDK2AP2	2.10149e-11	-0.10325	0.691	0.668	5.47397e-07
MCRS1	0.297308	-0.103542	0.327	0.295	1
TACC1	0.230109	-0.1037	0.293	0.271	1
MYL12A	7.39467e-33	-0.104004	0.99	0.996	1.92616e-28
DCTN3	1.12686e-12	-0.104145	0.606	0.579	2.93524e-08
SIRT2	0.00267723	-0.104171	0.406	0.376	1
STUB1	0.000181637	-0.104195	0.466	0.435	1
RPS6KA1	8.11961e-05	-0.104249	0.537	0.496	1
NUCB1	1.86329e-10	-0.104482	0.614	0.582	4.85349e-06
ARRB2	5.81231e-14	-0.104639	0.73	0.71	1.51399e-09
EIF4EBP2	0.0111774	-0.104674	0.277	0.265	1
P2RY8	2.41101e-11	-0.104701	0.704	0.678	6.2802e-07
RSU1	8.5465e-05	-0.104942	0.449	0.42	1
LINC00861	2.38769e-05	-0.104973	0.54	0.51	0.621946
CANX	0.00083478	-0.105085	0.505	0.468	1
TSSC4	0.00384378	-0.105117	0.38	0.35	1
ADPGK	0.0782112	-0.1053	0.245	0.233	1
MEAF6	1.51618e-09	-0.105308	0.591	0.551	3.94935e-05
ADSS	0.105732	-0.105521	0.374	0.34	1
RNF125	0.00735096	-0.1058	0.383	0.357	1
MGAT1	0.00118867	-0.105947	0.424	0.393	1
MED30	0.125269	-0.106026	0.236	0.223	1
NDUFA6	5.76842e-14	-0.106037	0.677	0.646	1.50256e-09
LRRFIP1	4.71674e-12	-0.106469	0.793	0.779	1.22862e-07
SNRPB	1.21607e-13	-0.106506	0.716	0.688	3.16762e-09
ELP5	0.332732	-0.106887	0.26	0.239	1
PFN1	2.82268e-54	-0.10704	0.999	1	7.35252e-50
SAMD9	0.0450204	-0.10711	0.357	0.332	1
PPP3CC	0.00014912	-0.107454	0.552	0.504	1
BST2	1.40943e-11	-0.107696	0.694	0.681	3.67128e-07
PKN1	0.00240115	-0.107699	0.426	0.391	1
GTF3C1	0.0453115	-0.10799	0.297	0.281	1
BRD7	0.159289	-0.108226	0.269	0.251	1
SERTAD1	0.0213733	-0.108274	0.211	0.206	1
EPSTI1	0.00686367	-0.108387	0.349	0.334	1
RAB7A	9.43469e-11	-0.108456	0.636	0.597	2.45755e-06
PPP1R12A	1.39808e-06	-0.108505	0.628	0.584	0.0364172
FLI1	0.00829834	-0.108519	0.418	0.384	1
C16orf54	0.0435114	-0.108718	0.294	0.278	1
C18orf32	0.00875909	-0.108794	0.279	0.267	1
PSMA7	8.43575e-23	-0.109097	0.87	0.874	2.19734e-18
TBCB	6.75125e-14	-0.109592	0.72	0.701	1.75857e-09
GCH1	0.0517473	-0.109681	0.254	0.243	1
SPCS2	1.13787e-11	-0.10985	0.629	0.595	2.96392e-07
SPSB3	3.21373e-07	-0.110078	0.6	0.556	0.00837114
ZFAND2B	0.0186562	-0.110332	0.351	0.324	1
MPC1	0.0102639	-0.110368	0.267	0.255	1
RAB8B	0.045702	-0.11047	0.287	0.271	1
PRKCH	5.15798e-13	-0.110519	0.685	0.658	1.34355e-08
P4HB	9.19108e-11	-0.110915	0.722	0.687	2.39409e-06
ZFAND6	0.0689863	-0.11096	0.328	0.3	1
TMCO1	8.19844e-08	-0.110969	0.509	0.477	0.00213553
MACF1	0.00167567	-0.111141	0.535	0.495	1
TMOD3	0.000386614	-0.111151	0.451	0.418	1
CALM2	5.75215e-22	-0.11118	0.877	0.88	1.49832e-17
TUBB	3.15367e-08	-0.111337	0.674	0.64	0.000821469
CIAO1	0.0418852	-0.111452	0.355	0.326	1
CDC42EP3	6.24403e-05	-0.111561	0.448	0.42	1
S100A11	8.47906e-25	-0.111566	0.889	0.905	2.20863e-20
LAPTM4A	0.000281758	-0.11175	0.403	0.375	1
AHSA1	0.00744177	-0.11176	0.344	0.319	1
OGFR	0.00443956	-0.11187	0.39	0.362	1
SH3KBP1	6.22223e-06	-0.111946	0.581	0.539	0.162077
TAGLN2	1.48092e-16	-0.112	0.859	0.87	3.8575e-12
SELENOS	0.0114831	-0.112631	0.399	0.367	1
CD99	1.13057e-36	-0.112657	0.971	0.977	2.94491e-32
APPL1	0.0882895	-0.11298	0.205	0.197	1
VTI1B	0.00493842	-0.11322	0.362	0.335	1
IKBKG	0.0271329	-0.113736	0.324	0.3	1
PRKAR1A	0.00292826	-0.11383	0.441	0.407	1
CRBN	0.080833	-0.113931	0.423	0.381	1
HNRNPDL	7.67046e-22	-0.113949	0.905	0.905	1.998e-17
CD58	0.00041234	-0.11419	0.303	0.292	1
AKNA	1.22685e-08	-0.11423	0.607	0.573	0.000319569
DDOST	8.47808e-15	-0.114457	0.652	0.627	2.20837e-10
ANP32A	6.54029e-10	-0.114636	0.647	0.613	1.70361e-05
RNF115	0.0323651	-0.114736	0.297	0.279	1
MAPKAPK3	0.0621299	-0.114827	0.313	0.291	1
PSMB9	1.22895e-31	-0.115051	0.937	0.953	3.20116e-27
IMPDH1	0.0290261	-0.115065	0.228	0.219	1
XAF1	0.000192721	-0.115174	0.498	0.474	1
ARFGAP3	0.0249295	-0.11522	0.286	0.27	1
CD46	0.00139302	-0.115274	0.365	0.343	1
RAB18	0.00172837	-0.115377	0.393	0.364	1
DCXR	2.11541e-08	-0.115641	0.511	0.484	0.000551023
OTUB1	4.45426e-15	-0.115656	0.737	0.709	1.16025e-10
LRPAP1	1.62665e-07	-0.115825	0.469	0.441	0.00423709
POLR3GL	1.75963e-10	-0.115965	0.568	0.536	4.58348e-06
FDPS	4.7931e-05	-0.116093	0.451	0.42	1
GBP1	0.0157347	-0.11615	0.43	0.4	1
MCRIP1	0.000150252	-0.116339	0.41	0.381	1
ORMDL3	0.000389244	-0.116366	0.417	0.392	1
SRSF3	6.97762e-13	-0.116689	0.699	0.674	1.81753e-08
HSPA1A	0.0059347	-0.116767	0.267	0.259	1
KIF22	0.00110352	-0.117055	0.223	0.222	1
GPAA1	0.000876382	-0.117279	0.397	0.367	1
ZAP70	1.31593e-19	-0.117332	0.815	0.795	3.42774e-15
PPP2R5A	0.0598785	-0.117648	0.251	0.238	1
PTPRE	0.000522223	-0.118027	0.275	0.271	1
GLG1	4.34644e-08	-0.118676	0.57	0.534	0.00113216
CD63	8.92157e-09	-0.118686	0.521	0.509	0.000232389
GPR108	0.00318875	-0.119066	0.343	0.322	1
ACTR2	2.61293e-08	-0.119516	0.626	0.589	0.000680616
GLO1	0.0176257	-0.119674	0.242	0.231	1
TPI1	2.5811e-22	-0.119771	0.799	0.793	6.72325e-18
DAZAP2	4.79146e-30	-0.119997	0.913	0.911	1.24808e-25
H3F3A	8.58965e-55	-0.120054	0.987	0.994	2.23743e-50
PQLC3	0.0401551	-0.120672	0.289	0.27	1
ATP6V0D1	2.04384e-06	-0.120685	0.45	0.422	0.0532378
PRMT2	9.73377e-16	-0.120765	0.708	0.687	2.53545e-11
SAMD9L	4.12178e-05	-0.121235	0.387	0.371	1
AP1S2	0.0334811	-0.121281	0.272	0.257	1
CTSD	0.000227304	-0.121639	0.227	0.228	1
SASH3	6.70091e-15	-0.12198	0.7	0.674	1.74545e-10
G6PD	9.88179e-05	-0.122303	0.421	0.396	1
SDF4	7.7398e-09	-0.122671	0.527	0.497	0.000201606
PLSCR1	1.01178e-06	-0.1233	0.284	0.288	0.0263549
CST7	3.33631e-70	-0.123366	0.988	0.996	8.69043e-66
MYL12B	1.01119e-38	-0.123413	0.963	0.972	2.63396e-34
PTPN1	2.85558e-05	-0.123419	0.402	0.379	0.743822
SLC44A2	5.00889e-10	-0.123591	0.572	0.536	1.30472e-05
CAPNS1	0.00254642	-0.123607	0.328	0.311	1
CENPK	0.0215491	-0.123855	0.224	0.216	1
SEPT9	1.93472e-16	-0.124077	0.728	0.718	5.03956e-12
MINOS1	0.000350858	-0.124185	0.337	0.319	1
CALM1	9.58949e-44	-0.124278	0.987	0.991	2.49787e-39
CCDC88C	0.000102691	-0.124358	0.445	0.416	1
SDCBP	0.0394462	-0.124404	0.401	0.365	1
TOR2A	0.00288038	-0.12462	0.246	0.238	1
PARP9	0.0043975	-0.124664	0.319	0.303	1
MOB2	9.41809e-06	-0.124718	0.364	0.345	0.245322
PTPN7	0.000216662	-0.124954	0.435	0.407	1
ACAP2	7.9333e-07	-0.125032	0.542	0.503	0.0206647
BAZ1A	7.65571e-07	-0.125376	0.512	0.478	0.0199416
DDX39A	6.36971e-07	-0.126049	0.449	0.423	0.0165918
GOLPH3	0.000310294	-0.126464	0.355	0.336	1
HNRNPR	4.56438e-11	-0.126688	0.612	0.582	1.18893e-06
TMEM50A	5.38735e-22	-0.126809	0.738	0.725	1.4033e-17
VAMP2	5.14352e-07	-0.126954	0.518	0.485	0.0133978
SELENOT	5.77656e-13	-0.127521	0.555	0.529	1.50468e-08
TPM3	1.23429e-28	-0.127664	0.914	0.913	3.21507e-24
NENF	9.86751e-05	-0.12831	0.237	0.237	1
IVNS1ABP	0.868199	-0.12873	0.2	0.184	1
MIEN1	1.67544e-11	-0.129129	0.567	0.54	4.36418e-07
SH3BGRL	3.62888e-21	-0.129291	0.724	0.705	9.4525e-17
ARPC5	1.86903e-21	-0.129295	0.769	0.765	4.86846e-17
DPM2	6.89272e-05	-0.129379	0.27	0.265	1
CRIP1	7.35479e-16	-0.130086	0.706	0.681	1.91578e-11
STK4	4.96614e-19	-0.130126	0.754	0.732	1.29358e-14
TMED2	7.70954e-12	-0.130205	0.543	0.518	2.00818e-07
FAM45A	9.31091e-06	-0.130339	0.227	0.231	0.242531
SERF2	2.06076e-80	-0.130346	0.994	0.997	5.36787e-76
PIK3R5	0.000545514	-0.130548	0.35	0.333	1
SPPL2A	6.12607e-06	-0.130584	0.357	0.345	0.159572
CYTIP	1.3104e-13	-0.131692	0.628	0.607	3.41333e-09
FBXL5	0.000123108	-0.131942	0.299	0.291	1
MOB3A	1.21652e-05	-0.132156	0.326	0.319	0.316878
TGFBR2	4.53448e-05	-0.132163	0.36	0.345	1
CDC42	2.44004e-20	-0.132331	0.834	0.824	6.35581e-16
CMPK1	1.25671e-05	-0.132503	0.41	0.39	0.327347
AKAP13	1.88249e-08	-0.132597	0.638	0.596	0.000490352
POLR2B	0.00032882	-0.13296	0.328	0.313	1
CCDC69	9.58576e-07	-0.132961	0.421	0.401	0.024969
INPP4A	0.00140949	-0.132993	0.225	0.223	1
STOM	7.72582e-07	-0.133494	0.368	0.362	0.0201242
OS9	7.89371e-10	-0.133581	0.469	0.449	2.05615e-05
LAPTM5	2.30162e-43	-0.133674	0.963	0.97	5.99525e-39
FAM49B	1.70549e-15	-0.134498	0.665	0.641	4.44246e-11
SELENOF	7.23778e-14	-0.134666	0.621	0.584	1.8853e-09
TNFAIP3	3.541e-15	-0.134727	0.632	0.628	9.22359e-11
HIST1H2AC	0.00730089	-0.134898	0.215	0.212	1
PRDX5	4.26271e-18	-0.135322	0.643	0.621	1.11035e-13
NDUFB7	2.02231e-21	-0.136039	0.698	0.675	5.26772e-17
NCKAP1L	5.24213e-10	-0.136161	0.51	0.486	1.36547e-05
RASSF5	6.34529e-12	-0.136425	0.595	0.562	1.65282e-07
SYNE2	1.03167e-12	-0.136483	0.719	0.688	2.6873e-08
RASGRP2	1.13501e-13	-0.136529	0.61	0.581	2.95649e-09
CHST11	1.74686e-06	-0.136599	0.359	0.348	0.0455022
SLC9A3R1	1.55332e-34	-0.13674	0.923	0.929	4.04609e-30
PTGER4	6.46237e-06	-0.136754	0.301	0.3	0.168332
OSBPL8	1.83856e-08	-0.136989	0.453	0.433	0.000478908
SAMHD1	1.75398e-18	-0.13705	0.756	0.752	4.56876e-14
GLIPR1	8.96707e-08	-0.137183	0.432	0.422	0.00233574
CD2BP2	1.61174e-06	-0.137418	0.425	0.402	0.0419827
CCDC115	2.4894e-06	-0.137426	0.361	0.346	0.0648438
IFI6	4.33953e-07	-0.137491	0.497	0.481	0.0113036
ACTB	2.69265e-40	-0.137512	1	1	7.01381e-36
ATG12	1.79976e-05	-0.137855	0.366	0.346	0.468802
OSTF1	1.77595e-24	-0.138141	0.709	0.702	4.62601e-20
IMP3	1.6454e-16	-0.138348	0.586	0.564	4.28593e-12
AHNAK	1.6765e-14	-0.138537	0.819	0.806	4.36695e-10
MYL6	1.2309e-88	-0.138632	0.995	0.998	3.20625e-84
LCP1	1.05738e-25	-0.13881	0.906	0.896	2.75426e-21
SELENOK	1.68437e-14	-0.138858	0.557	0.53	4.38745e-10
DEK	5.3957e-15	-0.139496	0.657	0.631	1.40547e-10
LNPEP	1.39055e-06	-0.139589	0.409	0.392	0.0362212
AC004865.2	3.35761e-05	-0.140319	0.232	0.234	0.874591
BTN3A3	9.02757e-06	-0.140347	0.315	0.309	0.23515
PREX1	4.42133e-05	-0.140682	0.379	0.362	1
JTB	2.67499e-28	-0.140807	0.755	0.749	6.9678e-24
PSMC4	6.96873e-11	-0.140883	0.479	0.456	1.81522e-06
CLEC2D	2.8828e-14	-0.141155	0.654	0.633	7.50912e-10
ST6GAL1	3.85532e-06	-0.141312	0.282	0.282	0.100423
MRFAP1L1	2.97143e-09	-0.141379	0.426	0.409	7.73998e-05
ENO1	3.53016e-34	-0.142359	0.876	0.881	9.19536e-30
IL32	5.46143e-81	-0.142549	0.994	0.996	1.42259e-76
SLC20A1	9.20577e-07	-0.143136	0.243	0.25	0.0239792
ARL6IP6	2.68062e-07	-0.143244	0.323	0.321	0.00698249
ICAM2	0.000718972	-0.143527	0.358	0.338	1
PDIA6	3.46777e-16	-0.143957	0.563	0.547	9.03284e-12
PTRH1	3.22257e-08	-0.144077	0.224	0.235	0.000839415
BANF1	5.26879e-17	-0.144112	0.544	0.529	1.37241e-12
RHOA	7.50211e-52	-0.144404	0.956	0.97	1.95415e-47
TMEM9B	3.07704e-12	-0.144567	0.477	0.455	8.01508e-08
MZT2A	3.10911e-09	-0.144678	0.517	0.491	8.09861e-05
AC116366.3	3.26817e-11	-0.144883	0.456	0.444	8.51294e-07
STARD3NL	2.29133e-05	-0.14506	0.285	0.279	0.596846
TUBB4B	7.28108e-07	-0.145148	0.357	0.347	0.0189658
BCL9L	1.20589e-05	-0.145203	0.255	0.257	0.314109
CCDC107	1.63322e-24	-0.145316	0.673	0.652	4.25422e-20
AES	9.05262e-41	-0.145434	0.945	0.95	2.35803e-36
DUSP23	2.16549e-10	-0.145745	0.357	0.355	5.64066e-06
TRGC2	0.000882246	-0.146101	0.234	0.234	1
C12orf75	9.82119e-33	-0.146117	0.874	0.872	2.55822e-28
FBXO6	4.47271e-08	-0.146185	0.269	0.275	0.00116505
ORAI1	1.5735e-11	-0.146431	0.508	0.489	4.09865e-07
NAXE	1.93844e-10	-0.147244	0.428	0.411	5.04925e-06
CD3D	3.55062e-68	-0.147485	0.986	0.993	9.24867e-64
ADCY7	1.21835e-06	-0.148057	0.261	0.264	0.0317356
NPTN	2.10085e-07	-0.148527	0.2	0.21	0.00547231
SAMSN1	3.13527e-05	-0.149283	0.259	0.257	0.816676
TPP1	4.50168e-07	-0.149291	0.352	0.342	0.011726
RNF166	6.98125e-10	-0.150102	0.455	0.437	1.81848e-05
TAOK3	2.39288e-09	-0.150146	0.508	0.479	6.23297e-05
APOL6	6.05371e-10	-0.151229	0.454	0.439	1.57687e-05
OASL	3.39733e-13	-0.151506	0.229	0.251	8.84937e-09
TFDP2	2.80928e-07	-0.15179	0.265	0.268	0.00731761
EVL	9.64102e-38	-0.15226	0.927	0.942	2.51129e-33
HNRNPA2B1	1.28019e-42	-0.153499	0.951	0.955	3.33463e-38
ZNF276	2.13464e-08	-0.153591	0.252	0.261	0.000556032
ZNF428	5.79566e-23	-0.153686	0.602	0.583	1.50965e-18
SNX3	6.3788e-21	-0.153718	0.577	0.566	1.66155e-16
PPP1CA	7.29741e-52	-0.15434	0.92	0.935	1.90083e-47
NFATC3	1.16262e-13	-0.15485	0.507	0.492	3.02838e-09
MMP24OS	4.10112e-06	-0.155636	0.327	0.318	0.106826
RNPEPL1	3.32455e-15	-0.156313	0.454	0.462	8.6598e-11
UBE2F	2.83176e-12	-0.156885	0.242	0.26	7.37616e-08
RORA	3.84951e-08	-0.157536	0.276	0.284	0.00100272
RAP1GAP2	6.58069e-09	-0.158238	0.221	0.234	0.000171414
SAMD3	3.43291e-26	-0.158452	0.68	0.67	8.94204e-22
THEMIS	4.20574e-12	-0.158825	0.474	0.463	1.09551e-07
SP4	4.21862e-09	-0.159705	0.217	0.232	0.000109887
RUNX3	4.4387e-16	-0.159786	0.505	0.495	1.15619e-11
TNFRSF1A	8.30978e-13	-0.159978	0.304	0.315	2.16453e-08
CHD3	6.55135e-08	-0.160341	0.404	0.391	0.0017065
GNB2	3.04924e-27	-0.16048	0.689	0.688	7.94265e-23
PRKCQ	1.16549e-09	-0.160617	0.38	0.371	3.03586e-05
TMSB10	2.99197e-150	-0.160973	1	1	7.79348e-146
CD79B	4.68731e-09	-0.162471	0.256	0.266	0.000122095
TLN1	1.22683e-15	-0.162521	0.646	0.618	3.19565e-11
CD47	6.5786e-26	-0.163461	0.668	0.655	1.71359e-21
CD164	2.74755e-21	-0.163699	0.595	0.577	7.15681e-17
UBE2E3	3.28366e-12	-0.164095	0.303	0.311	8.55329e-08
RAB5IF	5.47228e-19	-0.164818	0.549	0.533	1.42542e-14
RRBP1	2.92003e-10	-0.16483	0.264	0.274	7.60609e-06
AC004687.1	1.18012e-10	-0.165525	0.34	0.344	3.07397e-06
RNF187	6.12052e-13	-0.1668	0.303	0.315	1.59427e-08
THEMIS2	2.23658e-10	-0.167559	0.195	0.212	5.82584e-06
IQGAP1	2.31882e-18	-0.167805	0.655	0.624	6.04007e-14
PDIA4	7.3894e-12	-0.169157	0.363	0.362	1.92479e-07
PPIB	1.41843e-67	-0.169285	0.955	0.963	3.69473e-63
LASP1	9.13259e-14	-0.169347	0.472	0.46	2.37886e-09
RIN3	1.92598e-09	-0.169614	0.323	0.324	5.01678e-05
LAMP1	4.37816e-13	-0.17004	0.439	0.43	1.14042e-08
PARP15	4.17361e-12	-0.170094	0.223	0.241	1.08714e-07
STK10	7.12006e-13	-0.170687	0.571	0.543	1.85463e-08
ITGB2	1.85379e-67	-0.171403	0.976	0.983	4.82876e-63
RPA2	3.1351e-14	-0.171666	0.429	0.42	8.1663e-10
SDF2L1	1.04036e-21	-0.172561	0.489	0.494	2.70993e-17
CD247	2.5059e-41	-0.172702	0.838	0.843	6.52736e-37
CD151	5.93491e-15	-0.172726	0.191	0.216	1.54592e-10
SORL1	1.35437e-09	-0.172829	0.237	0.252	3.52786e-05
DNAJB6	2.28432e-20	-0.173434	0.518	0.505	5.95018e-16
GABARAPL1	4.96405e-13	-0.173486	0.187	0.21	1.29304e-08
SLC25A20	4.36655e-11	-0.17389	0.253	0.265	1.1374e-06
PLEKHF1	3.65673e-11	-0.174291	0.295	0.304	9.52505e-07
UTRN	1.74711e-10	-0.17483	0.428	0.421	4.55086e-06
TSPAN14	1.08078e-22	-0.176151	0.594	0.581	2.81521e-18
SRSF2	2.21083e-34	-0.177772	0.666	0.668	5.75878e-30
ARL6IP5	1.66057e-46	-0.179029	0.869	0.876	4.32546e-42
KIAA1551	2.33466e-23	-0.179115	0.652	0.645	6.08133e-19
CEMIP2	6.93864e-13	-0.179292	0.325	0.334	1.80738e-08
LDHA	4.1963e-42	-0.17964	0.763	0.775	1.09305e-37
CYTH1	1.82985e-27	-0.180476	0.588	0.586	4.7664e-23
MYO1F	1.52881e-33	-0.180551	0.708	0.697	3.98225e-29
TRBC1	1.49961e-08	-0.180792	0.624	0.608	0.00039062
CYB561D2	7.81544e-21	-0.181883	0.445	0.446	2.03577e-16
CARD16	2.75386e-35	-0.182088	0.688	0.688	7.17325e-31
OAS1	5.22494e-17	-0.18303	0.323	0.346	1.36099e-12
RBM3	5.51718e-46	-0.183186	0.786	0.803	1.43711e-41
VSIR	8.36703e-28	-0.183204	0.659	0.652	2.17945e-23
NPRL2	1.07433e-13	-0.183221	0.288	0.299	2.79841e-09
SH2D2A	1.02816e-24	-0.184312	0.56	0.56	2.67815e-20
ATP1B3	7.78196e-15	-0.186504	0.373	0.373	2.02704e-10
STAT3	5.40804e-23	-0.187481	0.555	0.545	1.40869e-18
CD320	1.73275e-08	-0.187762	0.237	0.245	0.000451347
SLA	1.93778e-09	-0.188713	0.257	0.265	5.04754e-05
CALHM2	5.49497e-14	-0.189189	0.216	0.236	1.43133e-09
LPCAT1	2.30504e-15	-0.189891	0.261	0.283	6.00418e-11
CTDSP1	1.56352e-20	-0.190433	0.473	0.47	4.07265e-16
BTN3A2	9.93086e-28	-0.190675	0.622	0.613	2.58679e-23
DBI	3.50228e-59	-0.191089	0.848	0.861	9.12274e-55
BSG	3.40863e-54	-0.192071	0.732	0.733	8.8788e-50
HLA-C	8.14749e-179	-0.192351	0.998	1	2.12226e-174
VPS26B	6.33948e-16	-0.19268	0.338	0.347	1.65131e-11
DIAPH1	1.09144e-21	-0.193427	0.525	0.519	2.84297e-17
HSPA5	2.60115e-37	-0.194388	0.696	0.696	6.77548e-33
UBXN11	2.33849e-10	-0.194511	0.244	0.258	6.0913e-06
PSAP	9.19423e-36	-0.194705	0.661	0.655	2.39491e-31
CFL1	3.38037e-142	-0.194884	0.994	0.999	8.8052e-138
SRSF9	2.4996e-29	-0.196298	0.553	0.562	6.51095e-25
MT-ATP6	1.04344e-107	-0.198416	0.993	0.995	2.71796e-103
CD53	1.11186e-59	-0.199171	0.84	0.852	2.89617e-55
ADGRG5	1.31944e-22	-0.199223	0.204	0.24	3.43688e-18
ARIH2	1.92942e-29	-0.200028	0.501	0.501	5.02575e-25
FOSL2	1.86569e-27	-0.200435	0.157	0.2	4.85974e-23
NEAT1	4.38975e-29	-0.201039	0.702	0.708	1.14344e-24
MANF	8.44383e-20	-0.201083	0.355	0.371	2.19945e-15
TMED9	2.17211e-42	-0.202492	0.585	0.59	5.65791e-38
ARL5A	4.79612e-20	-0.202989	0.42	0.419	1.24929e-15
NDUFA12	1.7487e-56	-0.20431	0.752	0.761	4.55502e-52
PTPRC	4.19355e-88	-0.205243	0.975	0.983	1.09234e-83
ARHGAP10	2.14837e-23	-0.20667	0.204	0.242	5.59607e-19
CAST	1.47948e-39	-0.206736	0.691	0.693	3.85375e-35
RPTOR	6.26876e-21	-0.207839	0.195	0.229	1.63289e-16
ADAM10	2.77142e-20	-0.209556	0.333	0.35	7.219e-16
DHRS7	3.19337e-44	-0.209915	0.606	0.613	8.31809e-40
HLA-F	1.38943e-59	-0.210411	0.836	0.843	3.61918e-55
PAXX	2.10812e-65	-0.210454	0.845	0.848	5.49123e-61
PATL2	2.23676e-14	-0.210695	0.284	0.3	5.8263e-10
PEPD	3.54653e-22	-0.21092	0.294	0.315	9.238e-18
SUPT4H1	2.03324e-31	-0.211092	0.521	0.525	5.29619e-27
PDE3B	2.7717e-18	-0.212091	0.273	0.297	7.21974e-14
CLSTN1	2.98793e-20	-0.213327	0.261	0.286	7.78297e-16
PLEKHA1	5.68892e-23	-0.213952	0.193	0.229	1.48185e-18
CD8B	5.03023e-69	-0.215454	0.931	0.942	1.31027e-64
USP28	4.55231e-24	-0.21646	0.278	0.309	1.18579e-19
CYFIP2	9.51078e-33	-0.217521	0.598	0.59	2.47737e-28
KLRB1	6.76878e-05	-0.218708	0.215	0.227	1
HSP90AA1	1.2247e-74	-0.218773	0.924	0.939	3.19011e-70
FUT11	8.18441e-29	-0.219261	0.2	0.243	2.13187e-24
STAT4	2.14992e-26	-0.220133	0.282	0.316	5.6001e-22
STK38	1.66111e-36	-0.220999	0.569	0.574	4.32686e-32
SERTAD3	1.48058e-40	-0.222058	0.144	0.201	3.85661e-36
ODC1	1.05469e-11	-0.222479	0.267	0.277	2.74725e-07
ITK	4.0614e-20	-0.223593	0.407	0.413	1.05791e-15
LITAF	3.0276e-110	-0.225337	0.946	0.964	7.88628e-106
GLIPR2	1.41868e-29	-0.227497	0.402	0.423	3.69539e-25
SSBP4	4.58993e-35	-0.229404	0.489	0.512	1.19558e-30
CD5	1.99888e-22	-0.229629	0.379	0.392	5.20669e-18
SSBP3	4.48949e-30	-0.22995	0.158	0.201	1.16942e-25
EMP3	9.54371e-138	-0.231614	0.979	0.987	2.48594e-133
TMBIM1	1.93764e-27	-0.232593	0.352	0.372	5.04715e-23
SLAMF7	3.10947e-32	-0.233705	0.392	0.418	8.09955e-28
C11orf21	3.96844e-26	-0.236588	0.257	0.29	1.0337e-21
APBB1IP	4.5727e-56	-0.237131	0.647	0.662	1.1911e-51
SYNE1	5.12126e-33	-0.239967	0.548	0.555	1.33398e-28
ANXA4	6.14105e-34	-0.240156	0.364	0.395	1.59962e-29
PTPN18	2.82187e-30	-0.240184	0.318	0.35	7.35042e-26
NDUFB2	8.74076e-93	-0.24034	0.828	0.842	2.27679e-88
GADD45B	2.16317e-40	-0.240518	0.48	0.511	5.63463e-36
GRAP2	5.33943e-35	-0.242282	0.377	0.405	1.39082e-30
PRNP	5.19343e-40	-0.24242	0.249	0.3	1.35278e-35
TCF25	1.08538e-56	-0.24347	0.73	0.725	2.82719e-52
PIM1	4.04471e-45	-0.243696	0.515	0.56	1.05357e-40
PGAM1	8.69929e-83	-0.245155	0.775	0.796	2.26599e-78
PRR5L	1.28013e-37	-0.245868	0.319	0.364	3.33449e-33
BCL2L1	1.08609e-30	-0.247735	0.265	0.301	2.82904e-26
MATK	5.07543e-46	-0.247848	0.438	0.488	1.32205e-41
IGF2R	7.4181e-18	-0.248721	0.302	0.318	1.93227e-13
ANXA6	1.89193e-104	-0.250874	0.888	0.909	4.9281e-100
ARHGEF3	1.29687e-36	-0.251132	0.396	0.423	3.37808e-32
MALAT1	2.67469e-140	-0.25163	0.999	1	6.96703e-136
SEPT7	2.38165e-91	-0.253535	0.817	0.833	6.20372e-87
MGST3	6.30199e-51	-0.254036	0.447	0.48	1.64154e-46
ZCCHC17	1.30347e-36	-0.254346	0.315	0.352	3.39529e-32
CISD3	4.59838e-40	-0.255058	0.447	0.469	1.19779e-35
ARPC2	4.91308e-177	-0.255648	0.978	0.991	1.27976e-172
HLA-E	1.05602e-237	-0.255693	0.991	0.997	2.75072e-233
PLAC8	8.88307e-24	-0.256076	0.175	0.213	2.31386e-19
GLRX	2.28758e-42	-0.256426	0.506	0.524	5.95869e-38
UBB	2.77421e-149	-0.256654	0.948	0.965	7.22625e-145
JAZF1	2.48623e-47	-0.257293	0.194	0.255	6.47612e-43
EBP	2.0935e-41	-0.259659	0.372	0.407	5.45316e-37
ITGA5	7.18659e-45	-0.259663	0.172	0.23	1.87196e-40
TTC16	5.92282e-36	-0.25967	0.205	0.254	1.54278e-31
CD300A	4.87959e-34	-0.260196	0.429	0.454	1.27104e-29
BIN2	2.70889e-92	-0.260795	0.843	0.854	7.05611e-88
IQGAP2	8.62149e-36	-0.26201	0.429	0.452	2.24572e-31
FNDC3B	3.7279e-50	-0.2624	0.156	0.218	9.71043e-46
GIMAP7	9.28262e-116	-0.263039	0.896	0.931	2.41794e-111
GK5	6.80875e-39	-0.263103	0.195	0.248	1.77354e-34
DSTN	2.71144e-56	-0.264186	0.514	0.54	7.06277e-52
KLF2	9.59676e-70	-0.26451	0.741	0.784	2.49976e-65
BCL2L11	1.74346e-30	-0.265559	0.271	0.309	4.54137e-26
TOB1	2.40743e-41	-0.265975	0.299	0.348	6.27087e-37
TSEN54	3.16192e-50	-0.268521	0.425	0.462	8.23617e-46
MAF	2.68919e-44	-0.269034	0.186	0.246	7.00481e-40
SERPINB9	6.5375e-46	-0.271655	0.301	0.352	1.70289e-41
PYHIN1	8.16002e-53	-0.272697	0.539	0.562	2.12552e-48
PDIA3	1.2621e-96	-0.273066	0.828	0.843	3.28752e-92
DYNLL1	3.51527e-81	-0.27583	0.744	0.782	9.15659e-77
ARF6	1.86192e-70	-0.278023	0.613	0.644	4.84993e-66
IFI16	2.85072e-67	-0.280119	0.582	0.622	7.42555e-63
SERPINB1	5.79464e-57	-0.281514	0.642	0.662	1.50939e-52
XBP1	1.67775e-56	-0.281659	0.573	0.61	4.37019e-52
ZFP36	2.67719e-44	-0.282085	0.776	0.783	6.97354e-40
S1PR1	1.60773e-48	-0.283603	0.381	0.426	4.18782e-44
ADGRE5	4.48921e-48	-0.286707	0.638	0.641	1.16935e-43
TSPAN32	1.8104e-50	-0.29009	0.34	0.389	4.71573e-46
CCND3	9.80418e-127	-0.290977	0.856	0.88	2.55379e-122
SELPLG	3.25271e-84	-0.290979	0.77	0.783	8.47267e-80
IFITM1	3.56057e-140	-0.291634	0.98	0.991	9.27458e-136
ADRB2	9.73793e-69	-0.295992	0.165	0.243	2.53654e-64
NR3C1	4.07113e-52	-0.296753	0.37	0.415	1.06045e-47
PXN	8.8238e-90	-0.296938	0.594	0.636	2.29842e-85
ABHD17A	2.17593e-50	-0.303731	0.389	0.431	5.66786e-46
HLA-B	0	-0.304662	1	1	0
UPP1	4.27782e-72	-0.305264	0.442	0.497	1.11429e-67
SCP2	1.12537e-91	-0.305853	0.6	0.637	2.93137e-87
GNG2	7.07037e-90	-0.30776	0.638	0.671	1.84169e-85
S100A4	4.03767e-285	-0.309373	0.997	1	1.05173e-280
RAC1	1.70757e-82	-0.31215	0.574	0.625	4.44789e-78
MBP	4.17741e-75	-0.314324	0.494	0.546	1.08813e-70
ERI1	1.21924e-69	-0.315551	0.217	0.295	3.17587e-65
CHST12	1.22164e-108	-0.316716	0.621	0.678	3.18212e-104
HLA-A	0	-0.317622	0.999	1	0
HAVCR2	1.1664e-64	-0.324805	0.489	0.538	3.03825e-60
RAP2B	7.25243e-64	-0.325326	0.24	0.309	1.88911e-59
ABI3	1.79219e-106	-0.334819	0.524	0.597	4.6683e-102
MRPS6	6.99829e-82	-0.336005	0.499	0.544	1.82291e-77
CD52	0	-0.343525	0.996	0.999	0
CD226	1.36583e-98	-0.343725	0.156	0.251	3.55772e-94
CD3G	2.08946e-221	-0.344934	0.918	0.943	5.44261e-217
SPN	5.93409e-114	-0.345128	0.7	0.733	1.54571e-109
HSP90B1	5.35398e-135	-0.348287	0.753	0.798	1.3946e-130
FGR	7.68771e-103	-0.351684	0.444	0.53	2.00249e-98
CEBPB	1.44655e-80	-0.353251	0.296	0.376	3.76797e-76
CYBA	1.65548e-212	-0.354705	0.948	0.97	4.31219e-208
CREM	1.19342e-47	-0.354922	0.29	0.342	3.10862e-43
TMEM173	1.43919e-108	-0.356187	0.474	0.549	3.7488e-104
YWHAQ	8.5551e-149	-0.3566	0.679	0.743	2.22843e-144
PTPN4	2.00875e-112	-0.358382	0.508	0.578	5.23239e-108
SUN2	2.59796e-118	-0.358445	0.706	0.753	6.76717e-114
CTSW	2.4974e-223	-0.361503	0.923	0.961	6.50524e-219
TPST2	4.94386e-120	-0.365813	0.609	0.665	1.28778e-115
CEP78	1.78208e-82	-0.366826	0.275	0.361	4.64197e-78
TSC22D3	4.63281e-123	-0.367763	0.655	0.734	1.20675e-118
VCL	8.30544e-91	-0.368521	0.176	0.266	2.1634e-86
CD6	8.44734e-86	-0.368882	0.347	0.428	2.20036e-81
CLIC3	4.31684e-74	-0.372936	0.539	0.592	1.12445e-69
PTGER2	2.62633e-115	-0.375015	0.466	0.563	6.84107e-111
NFATC2	4.77233e-95	-0.375526	0.387	0.462	1.2431e-90
APMAP	1.01397e-156	-0.375968	0.647	0.704	2.64118e-152
HCST	0	-0.377573	0.981	0.993	0
FLNA	3.11146e-206	-0.380798	0.928	0.948	8.10474e-202
TMEM273	1.92579e-171	-0.380799	0.089	0.209	5.01631e-167
ITGAL	2.45332e-129	-0.383074	0.635	0.689	6.39042e-125
KLRG1	1.70513e-146	-0.389975	0.588	0.692	4.44152e-142
B2M	0	-0.391881	1	1	0
SH3BGRL3	0	-0.395059	0.999	1	0
MSN	1.09989e-218	-0.401779	0.879	0.911	2.865e-214
TNFRSF1B	6.11736e-142	-0.405504	0.57	0.643	1.59345e-137
CCL4	4.428e-140	-0.407865	0.858	0.911	1.1534e-135
PCBP1	2.47321e-202	-0.407918	0.791	0.874	6.44222e-198
LAIR1	3.33339e-124	-0.409022	0.237	0.349	8.68281e-120
ITGB1	1.59562e-150	-0.41186	0.647	0.747	4.15628e-146
FCRL6	3.39142e-106	-0.420556	0.184	0.287	8.83398e-102
CTSC	5.18487e-283	-0.435997	0.867	0.923	1.35055e-278
ITGAM	1.70375e-140	-0.437308	0.195	0.316	4.43793e-136
SRGN	0	-0.437924	0.953	0.984	0
RAP1B	0	-0.452455	0.841	0.907	0
GZMM	7.8025e-306	-0.475132	0.761	0.872	2.03239e-301
IFITM2	2.77134e-283	-0.483635	0.902	0.936	7.21879e-279
KLRC1	1.74767e-86	-0.492895	0.336	0.431	4.55233e-82
FCER1G	2.37513e-120	-0.503821	0.114	0.222	6.18675e-116
DDIT4	5.52867e-148	-0.504393	0.458	0.568	1.44011e-143
CALR	8.57774e-260	-0.516456	0.847	0.896	2.23433e-255
GNPTAB	2.50084e-191	-0.522077	0.376	0.502	6.51418e-187
TTC38	6.76373e-181	-0.522129	0.334	0.471	1.76182e-176
C1orf21	4.56903e-256	-0.535829	0.184	0.356	1.19014e-251
ID2	7.33485e-219	-0.539508	0.68	0.766	1.91058e-214
PRF1	0	-0.540403	0.952	0.989	0
NKG7	0	-0.542053	1	1	0
HPGD	2.74198e-212	-0.54611	0.17	0.325	7.1423e-208
ZNF683	1.16447e-104	-0.558542	0.147	0.251	3.0332e-100
PRSS23	4.10764e-250	-0.578777	0.252	0.425	1.06996e-245
TGFBR3	1.34839e-277	-0.580806	0.423	0.587	3.51228e-273
HOPX	5.76634e-202	-0.611949	0.493	0.651	1.50202e-197
LY6E	0	-0.616121	0.934	0.974	0
ANXA1	0	-0.619561	0.84	0.946	0
KLF3	5.18555e-268	-0.624575	0.339	0.511	1.35073e-263
EFHD2	0	-0.660757	0.414	0.586	0
ASCL2	0	-0.677418	0.266	0.462	0
PLEK	0	-0.680777	0.777	0.913	0
TXNIP	0	-0.681986	0.917	0.974	0
CD8A	0	-0.689486	0.927	0.978	0
LAIR2	6.82291e-204	-0.71237	0.232	0.391	1.77723e-199
AKR1C3	0	-0.732317	0.102	0.317	0
GNLY	0	-0.766085	0.974	0.982	0
S1PR5	0	-0.768154	0.182	0.441	0
TBX21	0	-0.803923	0.406	0.64	0
GZMB	0	-0.832974	0.827	0.974	0
KIR2DL3	0	-0.84049	0.091	0.3	0
KIR3DL1	0	-0.886582	0.069	0.247	0
ZEB2	0	-0.891935	0.295	0.58	0
GZMH	0	-0.937279	0.876	0.985	0
CX3CR1	0	-1.04686	0.646	0.884	0
ADGRG1	0	-1.11205	0.478	0.808	0
FCGR3A	0	-1.12281	0.493	0.802	0
KLRD1	0	-1.30593	0.412	0.795	0
SPON2	0	-1.38837	0.334	0.662	0
FGFBP2	0	-1.75967	0.594	0.973	0

## Sheet: TableS5
Supplementary Table 5. Assessing performance of different strategies to define CAR T cell
lineages by tracking T cell receptors across time points.
Patient	α only	β only	one α & one β	Strict
0	N/A	N/A	N/A	N/A
1	N/A	N/A	N/A	N/A
2	42	13	9	7
3	4	1	0	1
4	119	87	74	65
5	271	75	32	27
6	133	96	100	81
7	13	13	11	11
8	367	114	70	62
9	228	52	41	29
10	566	242	163	139
11	658	452	385	361
12	1	0	0	0
13	72	12	1	1
14	22	13	11	11
15	198	175	165	163
Total:	2694	1345	1062	958
The complementarity determining regin 3 (CDR3) of each α and β chain were sequenced to
determine expressed alleles of each chain. α only: classifying two CAR cells as lineages when
all a observed alleles match exactly with disregarding the β chain. β only: classifying two CAR
cells as lineages based on matching in only the β chain. Neither of these approaches fully
represents the TCR by neglecting the contribuiton of the other chain. Since cells can
differentially express distinct alleles of both the α and β chains of the TCR, the strictest definition
of a lineage would be cases where all alphas and all betas must match between two or more
cells (Strict). We detected the fewest numbers of lineages when requiring exact matches of all
alleles, and thus defined lineages using a "one-from-each" approach (one α & one β), where
cells that match their most highly expressed α and β chains (as a stringency filter) are
designated as lineages. N/A= not applicable due to unavailability of either GMP or post-infusion
samples.

## Sheet: TableS6
Supplementary Table 6. Assessing clonal expansion among post-infusion CAR T cells. For
each patient's post-infusion samples, we show the number of unique clones across a range of
clone sizes. E.g., clone size = 1 corresponds to the number of unique clones only found in a
single cell.
Patient	clone size = 1	1 < clone size <= 10	clone size > 10
0	N/A	N/A	N/A
1	N/A	N/A	N/A
2	979	11	0
3	169	0	0
4	1150	133	1
5	5184	178	0
6	1302	185	2
7	87	4	0
8	4958	129	1
9	3323	107	0
10	7.085	396	12
11	8028	639	4
12	180	1	0
13	2824	209	0
14	4807	156	4
15	4905	472	43
Total:	44981	2620	67
N/A= not applicable due to unavailability of post-infusion samples.

## Sheet: TableS7
Supplementary Table 7. Differentially expressed genes between effector precursors and all other CD8+ GMP cells. Pct.1 corresponds to the percentage of effector precursors expressing a gene, and pct.2 corresponds to the percentage of all other CD8+ GMP cells expressing a gene.
Gene	p_val	avg_log2FC	pct.1	pct.2	p_val_adj
PLEK	2.31321e-296	0.364542	0.292	0.016	6.02544e-292
TIGIT	1.74629e-212	0.68609	0.48	0.06	4.54875e-208
EOMES	8.41267e-184	0.217757	0.226	0.016	2.19133e-179
ELOVL4	3.92333e-176	0.254744	0.313	0.031	1.02195e-171
MSC	9.21197e-155	0.480344	0.439	0.067	2.39953e-150
GZMH	4.99737e-153	0.552716	0.345	0.043	1.30171e-148
AC017002.3	1.09828e-144	0.524068	0.464	0.079	2.8608e-140
KLRD1	3.1203e-139	0.344266	0.27	0.029	8.12775e-135
CCL4	3.27127e-126	1.04582	0.295	0.037	8.52101e-122
LINC01943	1.33088e-122	1.08806	0.668	0.199	3.46669e-118
CCL3	5.18249e-116	0.707193	0.266	0.033	1.34994e-111
GZMK	6.23907e-114	1.22226	0.48	0.103	1.62515e-109
HLA-DQA1	2.60064e-97	1.12712	0.624	0.197	6.77415e-93
HLA-DPA1	2.33478e-92	1.52377	0.934	0.664	6.08162e-88
HLA-DRB1	2.8734e-89	1.31846	0.987	0.827	7.48464e-85
CD52	7.84091e-88	-1.24865	0.987	0.995	2.0424e-83
MAL	5.9585e-81	-1.25104	0.414	0.885	1.55207e-76
HLA-DRB5	7.25872e-81	1.08436	0.972	0.666	1.89075e-76
LTB	2.40869e-67	-1.30687	0.978	0.994	6.27416e-63
CD74	2.98854e-65	0.759303	1	0.999	7.78456e-61
CAPG	5.23014e-65	-0.972763	0.539	0.928	1.36235e-60
SH3BGRL3	1.7837e-64	-0.737578	1	0.998	4.64617e-60
IFITM3	2.47116e-64	-1.08223	0.58	0.889	6.43688e-60
HLA-DQA2	4.90094e-64	0.762851	0.552	0.188	1.2766e-59
HLA-DPB1	1.21514e-60	0.897488	0.934	0.658	3.1652e-56
FLT3LG	1.45919e-60	-0.852034	0.696	0.906	3.80091e-56
NPM1	1.69949e-59	0.607037	1	0.993	4.42682e-55
HLA-DRA	2.92084e-59	0.901164	0.978	0.832	7.6082e-55
CD86	1.36976e-58	0.284958	0.448	0.136	3.56795e-54
CD7	5.94582e-58	-0.692552	0.953	0.995	1.54877e-53
PPP2R2B	7.55057e-57	0.25164	0.31	0.075	1.96677e-52
IFNG	1.93878e-51	0.494949	0.527	0.193	5.05014e-47
CD27	1.60423e-50	-0.783349	0.589	0.869	4.17869e-46
RPL12	1.18305e-49	0.414022	1	0.998	3.08162e-45
TIMP1	1.20103e-48	-0.825793	0.467	0.827	3.12844e-44
FABP5	3.5334e-47	0.772625	0.934	0.737	9.2038e-43
HSPD1	1.75863e-46	0.683846	0.978	0.921	4.58089e-42
NOSIP	2.40523e-45	-0.69279	0.903	0.954	6.26514e-41
F2R	3.10638e-45	0.38164	0.574	0.238	8.0915e-41
GSTP1	4.33554e-45	0.56311	1	0.961	1.12932e-40
LIMD2	1.55218e-44	-0.56939	0.991	0.994	4.04312e-40
RPLP0	2.04752e-44	0.345877	1	0.999	5.33338e-40
IFITM1	2.52978e-44	-0.795113	0.947	0.989	6.58957e-40
SPOCK2	3.6931e-44	-0.691181	0.555	0.83	9.61978e-40
HLA-DQB1	3.208e-43	0.808195	0.824	0.548	8.35619e-39
ITM2B	2.74098e-42	-0.570348	0.953	0.968	7.1397e-38
TPT1	5.08125e-42	-0.341936	1	0.999	1.32356e-37
IFITM2	5.11204e-42	-0.739581	0.884	0.978	1.33158e-37
RPL8	8.97992e-41	0.283226	1	0.999	2.33909e-36
SEC11C	9.36133e-41	0.573464	0.865	0.63	2.43844e-36
EVL	3.24279e-40	-0.558475	0.975	0.992	8.44682e-36
RNASE6	2.52014e-39	0.182618	0.219	0.053	6.56446e-35
LRRN3	2.57473e-39	-0.645434	0.357	0.696	6.70665e-35
SUB1	1.25652e-37	0.43444	0.997	0.982	3.27298e-33
ITM2C	2.7644e-37	-0.672762	0.574	0.884	7.2007e-33
CD8B	5.22323e-37	-0.573188	0.972	0.968	1.36055e-32
CST7	8.10835e-37	0.840627	0.994	0.944	2.11206e-32
HSP90AB1	1.63202e-36	0.786892	0.987	0.955	4.25109e-32
RPL5	6.63297e-36	0.373615	1	0.996	1.72775e-31
PARK7	8.19726e-36	0.366106	0.994	0.977	2.13522e-31
GPSM3	3.11456e-35	-0.450611	0.972	0.988	8.11279e-31
SELL	8.53664e-34	-0.653632	0.806	0.939	2.22363e-29
CD3E	9.22287e-34	-0.364223	1	0.997	2.40237e-29
GALM	2.23709e-33	0.491303	0.815	0.56	5.82716e-29
RPS27	1.60275e-32	-0.377252	1	0.998	4.17483e-28
GAPDH	2.37934e-32	0.463539	1	1	6.19771e-28
DRAP1	1.01817e-31	-0.383346	0.984	0.988	2.65213e-27
RPS7	1.75732e-31	0.252076	1	0.998	4.57746e-27
PPIA	2.37894e-31	0.248034	1	0.998	6.19665e-27
CENPU	8.39536e-31	0.432574	0.875	0.651	2.18682e-26
S100A4	1.07015e-30	-0.583007	0.997	0.996	2.78751e-26
RPL7	1.47781e-30	0.364734	1	0.994	3.8494e-26
VSIR	1.7874e-30	-0.500181	0.636	0.802	4.65581e-26
TMSB10	2.7518e-30	-0.328881	1	1	7.16788e-26
STK17B	4.01029e-30	-0.546103	0.903	0.948	1.0446e-25
BCAT1	4.51702e-30	0.290221	0.574	0.278	1.17659e-25
EEF2	4.7636e-30	0.344809	0.997	0.996	1.24082e-25
UCP2	7.35095e-30	-0.543236	0.966	0.965	1.91478e-25
F8	7.59873e-30	0.134724	0.226	0.066	1.97932e-25
B2M	9.79767e-30	-0.263489	1	1	2.5521e-25
OSTF1	1.7536e-29	0.423216	0.978	0.953	4.56777e-25
PIM1	1.86204e-29	-0.531306	0.922	0.947	4.85024e-25
ARG2	1.35839e-28	0.183793	0.216	0.064	3.53835e-24
RNF213	2.32753e-28	0.534216	0.925	0.823	6.06274e-24
INSIG1	2.90546e-28	0.627948	0.893	0.701	7.56813e-24
OASL	4.82751e-28	0.275431	0.549	0.272	1.25747e-23
OAZ1	2.16534e-27	0.305905	1	0.994	5.64027e-23
FAM3C	2.72617e-27	0.227502	0.458	0.208	7.10113e-23
IER2	2.82365e-27	-0.529273	0.978	0.986	7.35505e-23
PPA1	2.97569e-27	0.388347	0.984	0.909	7.75108e-23
CTH	4.15282e-27	0.236701	0.288	0.104	1.08173e-22
FYN	7.58963e-27	0.335035	0.467	0.225	1.97695e-22
RPS6	1.20515e-26	0.241621	1	0.999	3.13918e-22
LYAR	1.35122e-26	0.394531	0.715	0.438	3.51965e-22
PLAC8	1.66566e-26	-0.568947	0.395	0.663	4.33871e-22
RPL3	1.68152e-26	0.259626	1	0.999	4.38003e-22
RGS1	2.10411e-26	0.250142	0.295	0.108	5.48078e-22
EMP3	2.2718e-26	-0.372505	0.997	0.994	5.91759e-22
TMBIM6	2.5208e-26	0.338155	0.997	0.981	6.56619e-22
RPL7A	4.93571e-26	0.243024	1	0.999	1.28565e-21
FXYD5	8.39805e-26	-0.347189	0.997	0.997	2.18752e-21
RAN	1.00645e-25	0.339958	0.991	0.987	2.6216e-21
PRDX4	1.06984e-25	0.347073	0.759	0.499	2.78672e-21
IMPDH2	2.83665e-25	0.424348	0.962	0.903	7.38892e-21
CD44	3.39358e-25	-0.586604	0.746	0.845	8.83961e-21
LEF1	4.43442e-25	-0.467619	0.335	0.598	1.15508e-20
HLA-DMA	4.93094e-25	0.425711	0.853	0.643	1.28441e-20
PYHIN1	4.99844e-25	0.18495	0.298	0.111	1.30199e-20
LAPTM5	5.9433e-25	-0.353391	0.991	0.989	1.54811e-20
ASB2	7.45292e-25	0.30472	0.442	0.208	1.94134e-20
GNLY	8.76217e-25	1.4188	0.245	0.086	2.28237e-20
RGS10	1.09792e-24	-0.363711	0.959	0.973	2.85985e-20
AHCY	1.46854e-24	0.391016	0.878	0.738	3.82524e-20
LAG3	3.88523e-24	0.428553	0.699	0.413	1.01203e-19
CISH	4.11841e-24	-0.433591	0.959	0.975	1.07276e-19
GLIPR2	4.52751e-24	-0.466722	0.411	0.64	1.17933e-19
BAX	5.46295e-24	-0.513505	0.95	0.966	1.42299e-19
MYL12A	6.03001e-24	-0.313187	1	0.997	1.5707e-19
CD70	7.29692e-24	0.371027	0.749	0.465	1.9007e-19
CCT8	1.1085e-23	0.364334	0.984	0.932	2.88742e-19
PCBP2	1.16927e-23	-0.309902	1	0.995	3.04572e-19
ACTA2	1.43674e-23	0.26265	0.379	0.168	3.74243e-19
CSTB	1.79066e-23	-0.454386	0.937	0.929	4.6643e-19
HLA-E	1.87902e-23	-0.39784	0.997	0.995	4.89447e-19
RPL18A	2.57022e-23	0.193505	1	0.999	6.6949e-19
MFSD10	2.59843e-23	0.352862	0.859	0.653	6.76839e-19
AES	3.82565e-23	-0.501491	0.846	0.892	9.96506e-19
PDIA6	5.34164e-23	0.364897	0.95	0.849	1.39139e-18
SUSD3	5.94042e-23	-0.408172	0.611	0.771	1.54736e-18
RPS5	8.49192e-23	0.222551	1	0.998	2.21198e-18
PGAM1	1.09122e-22	0.426531	1	0.977	2.84242e-18
XBP1	1.11173e-22	-0.474342	0.84	0.899	2.89584e-18
PTGER2	1.36788e-22	-0.496545	0.661	0.792	3.56306e-18
FAM216A	1.53619e-22	0.243517	0.586	0.319	4.00147e-18
IL2RA	1.61063e-22	0.579418	0.85	0.656	4.19537e-18
CACYBP	1.93265e-22	0.386203	0.975	0.901	5.03416e-18
RPSA	2.77374e-22	0.204452	1	0.999	7.22505e-18
LAT	2.7962e-22	-0.373607	0.95	0.962	7.28354e-18
TUBB4A	4.86929e-22	0.116336	0.226	0.077	1.26835e-17
BPGM	4.96933e-22	0.261628	0.382	0.179	1.29441e-17
SLC25A3	7.07508e-22	0.299645	0.997	0.982	1.84292e-17
EIF1AY	7.48232e-22	0.3262	0.492	0.253	1.94899e-17
AL158071.3	8.5348e-22	0.141855	0.226	0.079	2.22314e-17
CD3D	8.75474e-22	-0.337272	1	0.994	2.28043e-17
RPS3A	2.10685e-21	0.212653	1	0.999	5.48792e-17
MCUB	3.51494e-21	-0.411249	0.705	0.801	9.15572e-17
MTHFD2	3.64153e-21	0.441025	0.947	0.844	9.48547e-17
SLC43A3	3.80818e-21	0.270568	0.549	0.304	9.91955e-17
RPL32	3.91697e-21	0.193393	1	0.999	1.02029e-16
NUCB2	4.69587e-21	-0.435124	0.834	0.894	1.22318e-16
ATP6V1G1	4.8038e-21	-0.322761	0.953	0.948	1.25129e-16
APOBEC3B	4.8954e-21	0.190515	0.31	0.13	1.27515e-16
DDX3Y	8.00602e-21	0.181404	0.389	0.175	2.08541e-16
SHMT2	8.72209e-21	0.338559	0.975	0.929	2.27193e-16
AMZ2	9.23471e-21	0.336464	0.871	0.702	2.40546e-16
HLA-B	9.87801e-21	-0.285236	1	1	2.57302e-16
SKAP2	1.14364e-20	0.21102	0.461	0.23	2.97896e-16
CDC25B	1.38561e-20	-0.462184	0.815	0.896	3.60924e-16
ELL2	1.86164e-20	0.1803	0.329	0.143	4.8492e-16
PTTG1	2.86023e-20	0.384121	0.978	0.863	7.45033e-16
LMAN1	5.91183e-20	0.367964	0.922	0.812	1.53991e-15
RPS4Y1	6.82833e-20	0.557601	0.605	0.332	1.77864e-15
AIM2	1.13552e-19	0.104812	0.216	0.078	2.95779e-15
CALM1	1.44604e-19	-0.312363	1	0.997	3.76663e-15
LCK	1.92528e-19	-0.299067	0.978	0.99	5.01498e-15
H2AFV	2.0852e-19	-0.44041	0.94	0.92	5.43153e-15
MDH2	2.41267e-19	0.276264	0.972	0.951	6.28452e-15
RPS12	4.02444e-19	0.178877	1	0.999	1.04828e-14
PAICS	5.86065e-19	0.385548	0.834	0.663	1.52658e-14
ASNS	6.46464e-19	0.346132	0.705	0.478	1.68391e-14
ALOX5AP	6.69405e-19	0.353353	0.997	0.972	1.74367e-14
H3F3A	7.10848e-19	-0.286753	0.997	0.995	1.85162e-14
PRDX3	1.21463e-18	0.340839	0.978	0.904	3.16386e-14
SLF1	1.46594e-18	0.224856	0.69	0.417	3.81849e-14
MALAT1	1.47121e-18	-0.582482	1	1	3.83221e-14
CD55	1.8419e-18	-0.259069	0.737	0.826	4.79778e-14
SYNE2	1.94401e-18	-0.485468	0.527	0.685	5.06375e-14
H3F3B	1.97915e-18	-0.262323	0.997	0.999	5.1553e-14
MT-ND4	1.98489e-18	0.351637	1	0.998	5.17023e-14
GSTK1	2.24841e-18	0.314541	0.997	0.981	5.85667e-14
IL7R	2.33835e-18	-0.420412	0.254	0.509	6.09094e-14
CCDC107	2.42828e-18	-0.368578	0.683	0.79	6.32518e-14
SFT2D1	2.58518e-18	0.286148	0.755	0.552	6.73387e-14
FBL	2.79017e-18	0.334288	0.981	0.893	7.26784e-14
FCER1G	3.42625e-18	-0.515933	0.06	0.276	8.9247e-14
CDKN2D	4.08319e-18	-0.516248	0.561	0.693	1.06359e-13
CD69	4.53299e-18	-0.412543	0.865	0.893	1.18075e-13
TXNIP	5.81283e-18	-0.607235	0.759	0.824	1.51413e-13
MT-ND4L	1.16696e-17	0.258746	1	0.999	3.0397e-13
RPS18	1.27667e-17	0.20424	1	0.999	3.32547e-13
S100A6	1.37883e-17	-0.292359	1	0.998	3.59157e-13
ZNF683	1.39189e-17	-0.565353	0.147	0.38	3.62559e-13
GTDC1	1.43469e-17	0.135358	0.373	0.178	3.73709e-13
LGALS3	1.44937e-17	-0.555006	0.765	0.84	3.77533e-13
EIF4EBP1	1.5194e-17	0.370191	0.897	0.753	3.95773e-13
RPL6	1.70986e-17	0.216228	1	0.997	4.45385e-13
ACAT1	1.86703e-17	0.332347	0.752	0.557	4.86324e-13
B3GNTL1	2.19122e-17	0.153572	0.408	0.209	5.70768e-13
AQP3	2.81869e-17	-0.545666	0.282	0.49	7.34212e-13
RPL11	3.19079e-17	0.179951	1	0.999	8.31137e-13
SMS	4.06171e-17	0.308196	0.89	0.733	1.05799e-12
LYRM4	5.91298e-17	0.239747	0.602	0.385	1.54021e-12
IL32	7.25899e-17	-0.380901	1	0.996	1.89082e-12
RIPOR2	7.6027e-17	-0.396192	0.558	0.683	1.98035e-12
RPL36	7.68887e-17	0.236737	1	0.997	2.0028e-12
S100A10	8.21809e-17	-0.237817	1	0.997	2.14065e-12
GLIPR1	9.4776e-17	0.296838	0.639	0.412	2.46873e-12
ITGB7	9.53766e-17	-0.366504	0.931	0.941	2.48437e-12
GSTM4	1.03304e-16	0.153372	0.423	0.221	2.69086e-12
IDH2	1.15318e-16	-0.348292	0.928	0.949	3.0038e-12
PDE6G	1.20264e-16	-0.312185	0.135	0.35	3.13262e-12
SLC27A5	1.38483e-16	0.186128	0.533	0.305	3.60722e-12
PLP2	1.44614e-16	-0.329369	0.969	0.971	3.76691e-12
CDC42SE1	1.53847e-16	-0.378848	0.636	0.755	4.00739e-12
SLC25A4	1.69298e-16	0.124475	0.238	0.098	4.40988e-12
CTNNAL1	1.90304e-16	0.284896	0.762	0.534	4.95703e-12
VDAC1	1.92235e-16	0.297602	0.984	0.937	5.00735e-12
MUC20-OT1	2.00239e-16	0.235035	0.687	0.466	5.21581e-12
CD82	2.22433e-16	-0.359633	0.746	0.848	5.79393e-12
NINJ2	2.54285e-16	0.142901	0.351	0.17	6.62361e-12
MRPL10	2.73732e-16	0.320054	0.796	0.622	7.13018e-12
BIN2	2.85114e-16	-0.340406	0.752	0.839	7.42665e-12
AK2	3.03007e-16	0.27343	0.903	0.765	7.89272e-12
CCT4	3.21233e-16	0.305736	0.947	0.908	8.36747e-12
ISG20	3.28166e-16	-0.474744	0.749	0.839	8.54807e-12
EID1	3.35243e-16	0.273114	0.984	0.94	8.73242e-12
BTG2	3.44774e-16	-0.37565	0.317	0.503	8.98066e-12
DEF6	4.40604e-16	-0.299309	0.871	0.893	1.14768e-11
ATP5F1E	5.27444e-16	-0.276206	0.994	0.993	1.37389e-11
LIMS2	5.47158e-16	-0.349783	0.204	0.414	1.42524e-11
WDR41	6.50696e-16	0.172146	0.47	0.256	1.69493e-11
LEPROTL1	8.9153e-16	-0.336735	0.862	0.874	2.32226e-11
FANCL	9.71534e-16	0.11035	0.276	0.12	2.53065e-11
DDAH2	1.51792e-15	-0.366254	0.552	0.659	3.95388e-11
RPL10A	1.68238e-15	0.17116	1	0.997	4.38227e-11
GIMAP7	2.1219e-15	-0.39146	0.787	0.826	5.52713e-11
RPL9	2.29709e-15	0.1878	1	0.997	5.98347e-11
LST1	2.48513e-15	-0.364272	0.351	0.545	6.47326e-11
CD300A	2.63093e-15	0.216842	0.467	0.265	6.85305e-11
PCBD1	2.63735e-15	0.28079	0.784	0.573	6.86978e-11
TGIF1	2.79151e-15	0.107687	0.257	0.111	7.27132e-11
RPL4	2.93631e-15	0.201117	1	0.997	7.64851e-11
MT-CYB	3.91427e-15	0.313603	1	0.999	1.01959e-10
SH2D2A	4.15475e-15	0.334596	0.881	0.746	1.08223e-10
ISG15	4.23031e-15	-0.368374	0.636	0.731	1.10191e-10
ARL3	4.39421e-15	0.252585	0.665	0.437	1.1446e-10
CCND3	5.13801e-15	-0.314137	0.981	0.965	1.33835e-10
CD3G	6.08412e-15	-0.307742	0.928	0.931	1.58479e-10
PEBP1	6.91189e-15	0.288346	0.956	0.867	1.80041e-10
TRABD2A	7.00164e-15	-0.295497	0.298	0.485	1.82379e-10
BST2	7.21833e-15	0.263656	0.959	0.911	1.88023e-10
MIR155HG	7.42762e-15	0.123052	0.238	0.102	1.93475e-10
MECR	8.0715e-15	0.122346	0.373	0.187	2.10246e-10
UNG	8.1489e-15	0.305828	0.473	0.279	2.12262e-10
SRI	8.55869e-15	0.242031	0.984	0.936	2.22937e-10
SNAP47	9.48496e-15	0.216558	0.646	0.426	2.47064e-10
METTL9	1.34216e-14	-0.288849	0.455	0.609	3.49607e-10
GINS2	1.6389e-14	0.312159	0.777	0.561	4.26901e-10
DOK2	1.81702e-14	-0.363792	0.734	0.799	4.73298e-10
RHOF	1.94043e-14	-0.295021	0.875	0.873	5.05442e-10
C9orf16	1.94907e-14	-0.249059	0.984	0.977	5.07695e-10
HNRNPC	2.14127e-14	0.220929	0.997	0.976	5.57758e-10
FAH	2.23225e-14	0.23444	0.708	0.493	5.81457e-10
GPI	2.51044e-14	0.340733	0.997	0.975	6.5392e-10
TMIGD2	2.85987e-14	-0.25116	0.082	0.267	7.44938e-10
PTPN6	3.48457e-14	-0.341679	0.743	0.81	9.0766e-10
AP3S1	4.83059e-14	0.321655	0.824	0.667	1.25827e-09
UBA52	5.03017e-14	-0.173936	1	0.997	1.31026e-09
S100A11	5.2785e-14	-0.31684	0.984	0.99	1.37494e-09
RPL22L1	6.73433e-14	0.382118	0.875	0.737	1.75416e-09
CTLA4	8.31892e-14	0.144721	0.401	0.213	2.16691e-09
CD8B2	8.34003e-14	-0.239337	0.085	0.263	2.17241e-09
R3HDM4	8.63993e-14	-0.28743	0.32	0.49	2.25053e-09
SOCS2	9.00012e-14	0.216841	0.542	0.333	2.34435e-09
C20orf27	9.11559e-14	0.201628	0.643	0.424	2.37443e-09
STYXL1	9.45801e-14	0.182853	0.599	0.377	2.46362e-09
LOXL1-AS1	1.08623e-13	0.117747	0.26	0.119	2.82941e-09
MRPL11	1.12475e-13	0.264603	0.887	0.763	2.92975e-09
HLA-A	1.26527e-13	-0.217868	1	1	3.29579e-09
FARSB	1.37273e-13	0.204357	0.539	0.333	3.57568e-09
BACH2	1.56397e-13	-0.199	0.038	0.204	4.07383e-09
H2AFZ	1.56943e-13	0.299288	0.997	0.99	4.08804e-09
PLA2G16	1.76507e-13	0.206661	0.461	0.274	4.59765e-09
NPDC1	1.77457e-13	-0.330821	0.339	0.513	4.6224e-09
GARS	1.85211e-13	0.346611	0.937	0.817	4.82438e-09
RPL19	2.45355e-13	0.130572	1	0.999	6.391e-09
C1orf21	2.67914e-13	0.166167	0.386	0.214	6.97863e-09
SIT1	2.82527e-13	-0.297954	0.969	0.966	7.35926e-09
POLR2L	2.92327e-13	-0.335264	0.815	0.855	7.61454e-09
PCK2	2.98327e-13	0.25122	0.755	0.555	7.77082e-09
LYRM1	3.00972e-13	0.230174	0.618	0.421	7.83971e-09
IL16	3.32339e-13	-0.373843	0.724	0.782	8.65677e-09
RILPL2	3.32841e-13	0.200797	0.677	0.459	8.66984e-09
CNN2	3.35126e-13	-0.283134	0.987	0.985	8.72937e-09
CMC1	3.72196e-13	0.216121	0.683	0.477	9.69496e-09
TMEM273	3.89447e-13	0.143469	0.395	0.215	1.01443e-08
TRBC2	4.8724e-13	-0.459593	0.787	0.853	1.26916e-08
SOD1	5.09539e-13	0.276322	0.997	0.946	1.32725e-08
ARHGAP18	5.21068e-13	0.181905	0.524	0.322	1.35728e-08
WARS	5.36083e-13	0.275482	0.74	0.557	1.39639e-08
GYG1	5.4976e-13	0.277249	0.765	0.605	1.43202e-08
NDUFV2	5.6465e-13	0.213464	0.994	0.972	1.4708e-08
EEPD1	6.60838e-13	0.108835	0.248	0.115	1.72135e-08
SARAF	7.14843e-13	-0.242571	0.984	0.986	1.86202e-08
ARF6	7.40528e-13	-0.275421	0.715	0.775	1.92893e-08
LDHA	7.85621e-13	0.347309	1	0.991	2.04639e-08
RASA3	8.26308e-13	-0.256596	0.122	0.296	2.15237e-08
SPON2	8.29131e-13	0.0974309	0.26	0.122	2.15972e-08
PRKX	9.31805e-13	-0.312313	0.241	0.403	2.42717e-08
TXN	9.45759e-13	0.220623	0.994	0.986	2.46351e-08
VAMP8	9.89337e-13	-0.275704	0.912	0.926	2.57703e-08
OXCT1	1.02742e-12	0.208471	0.749	0.544	2.67621e-08
SLC26A4-AS1	1.28278e-12	0.0977456	0.21	0.092	3.34139e-08
TNFSF10	1.38448e-12	-0.401128	0.812	0.84	3.60629e-08
CSK	1.63282e-12	-0.309443	0.752	0.798	4.25316e-08
PRELID1	1.75314e-12	-0.306961	0.734	0.805	4.56659e-08
HAPLN3	2.06133e-12	-0.283216	0.226	0.397	5.36936e-08
TYW5	2.31192e-12	0.109054	0.292	0.147	6.02209e-08
EIF4H	2.68623e-12	0.231956	0.966	0.917	6.9971e-08
SP140	2.96552e-12	0.219686	0.784	0.587	7.7246e-08
LRRCC1	2.97184e-12	0.135536	0.401	0.228	7.74104e-08
ILK	3.11087e-12	-0.270476	0.871	0.887	8.1032e-08
CYFIP2	3.19007e-12	-0.320497	0.737	0.805	8.30949e-08
ZBTB38	3.33438e-12	0.114839	0.342	0.176	8.68539e-08
POLE4	3.67381e-12	0.22148	0.787	0.583	9.56955e-08
HNRNPLL	3.75354e-12	0.178882	0.592	0.391	9.77721e-08
ATIC	3.80239e-12	0.262769	0.721	0.532	9.90446e-08
OTULINL	3.82979e-12	-0.257351	0.285	0.452	9.97584e-08
TMSB4X	3.85832e-12	-0.191186	1	1	1.00502e-07
DBN1	4.26341e-12	-0.244957	0.232	0.432	1.11053e-07
IDS	4.39719e-12	0.215032	0.746	0.556	1.14538e-07
DENND3	4.66277e-12	0.106551	0.329	0.171	1.21456e-07
RFLNB	5.32884e-12	-0.285225	0.382	0.521	1.38806e-07
PYCARD	5.4797e-12	-0.273918	0.944	0.953	1.42735e-07
BATF3	5.58234e-12	0.116231	0.345	0.186	1.45409e-07
ZFP36L1	5.82246e-12	-0.325865	0.524	0.643	1.51663e-07
TPI1	5.98494e-12	0.257448	1	0.997	1.55896e-07
CCDC74A	6.32928e-12	0.10881	0.279	0.138	1.64865e-07
DHRS3	6.37853e-12	-0.245316	0.16	0.341	1.66148e-07
SORD	6.39506e-12	0.0864631	0.204	0.09	1.66579e-07
PTGES3	6.59923e-12	0.214482	0.981	0.961	1.71897e-07
RGS19	7.19352e-12	-0.287297	0.875	0.878	1.87377e-07
MGAT4A	7.65706e-12	-0.269108	0.411	0.542	1.99451e-07
TRAC	8.03254e-12	-0.419793	0.846	0.869	2.09232e-07
SNRPC	8.05414e-12	0.205082	0.972	0.918	2.09794e-07
LGALS3BP	8.06872e-12	-0.285004	0.248	0.427	2.10174e-07
RPS8	8.34019e-12	0.143148	1	0.999	2.17245e-07
LINC01184	8.7724e-12	0.107542	0.292	0.149	2.28503e-07
PAXX	9.37051e-12	-0.283956	0.821	0.831	2.44083e-07
PYCR1	9.49097e-12	0.175537	0.505	0.32	2.47221e-07
GSTM1	9.61171e-12	0.170927	0.633	0.429	2.50366e-07
MRPL37	9.86508e-12	0.233422	0.937	0.864	2.56966e-07
FAR2	1.08788e-11	0.088388	0.213	0.096	2.8337e-07
LIMA1	1.45792e-11	0.188933	0.502	0.318	3.79758e-07
CCDC69	1.59976e-11	-0.271716	0.398	0.545	4.16706e-07
LY6E	1.60304e-11	-0.313143	0.975	0.972	4.17559e-07
DESI1	1.64762e-11	0.209873	0.755	0.592	4.29171e-07
HSD17B7	1.78095e-11	0.116396	0.48	0.283	4.63903e-07
NMRAL1	1.82955e-11	0.206293	0.649	0.458	4.76561e-07
GHITM	1.8434e-11	0.194485	0.956	0.91	4.80168e-07
TGFB1	1.92102e-11	-0.297157	0.646	0.705	5.00388e-07
AZI2	2.04128e-11	0.152616	0.542	0.341	5.31714e-07
GALNT3	2.21666e-11	0.0872519	0.32	0.168	5.77395e-07
CORO1B	2.68719e-11	-0.452813	0.765	0.784	6.99959e-07
CYC1	2.79722e-11	-0.267085	0.683	0.762	7.28619e-07
MSMO1	2.88365e-11	0.191932	0.618	0.413	7.51133e-07
RAC2	2.89139e-11	-0.181497	1	0.997	7.53149e-07
TESC	2.90593e-11	-0.307179	0.542	0.626	7.56937e-07
COQ6	3.17163e-11	0.113158	0.351	0.193	8.26147e-07
PHGDH	3.38691e-11	0.316482	0.903	0.794	8.82223e-07
P2RX4	3.39262e-11	-0.215695	0.226	0.391	8.8371e-07
SLC1A5	3.97061e-11	0.279386	0.922	0.817	1.03426e-06
TRBC1	4.2123e-11	-0.55621	0.433	0.576	1.09722e-06
NUDT21	4.53958e-11	0.214346	0.95	0.922	1.18247e-06
GCAT	4.80689e-11	0.119686	0.335	0.186	1.2521e-06
HSPA9	4.92969e-11	0.217813	0.897	0.761	1.28408e-06
RGS14	4.98774e-11	-0.283249	0.533	0.638	1.29921e-06
AP002360.1	5.42501e-11	0.11062	0.273	0.14	1.41311e-06
CPPED1	5.43815e-11	0.158515	0.442	0.275	1.41653e-06
RPS3	5.54966e-11	0.1212	1	0.999	1.44557e-06
CXCR3	5.87922e-11	-0.404093	0.674	0.758	1.53142e-06
LSP1	5.92532e-11	0.257904	0.994	0.989	1.54343e-06
AC009948.1	5.99709e-11	0.101057	0.317	0.169	1.56212e-06
HTATSF1	6.02915e-11	-0.308657	0.705	0.754	1.57047e-06
MYDGF	6.10169e-11	0.232701	0.887	0.787	1.58937e-06
PDE4B	6.30145e-11	0.18317	0.564	0.369	1.6414e-06
MDH1	6.64022e-11	0.227603	0.962	0.923	1.72965e-06
HLA-DOA	6.70315e-11	0.0815717	0.207	0.096	1.74604e-06
NCR3	6.91272e-11	-0.338992	0.803	0.862	1.80063e-06
JAK1	7.88101e-11	-0.33277	0.592	0.655	2.05285e-06
FYB1	7.92328e-11	-0.29207	0.953	0.948	2.06385e-06
SERF2	8.21563e-11	-0.140766	1	0.998	2.14001e-06
EHD4	8.26887e-11	0.113624	0.361	0.201	2.15387e-06
FDPS	8.27176e-11	0.26779	0.956	0.902	2.15463e-06
RPL29	1.03504e-10	0.118657	1	0.999	2.69608e-06
CD248	1.03604e-10	-0.237115	0.11	0.264	2.69869e-06
PSMG1	1.04552e-10	0.208593	0.777	0.604	2.72336e-06
STAP1	1.17134e-10	-0.201295	0.166	0.32	3.0511e-06
CYSTM1	1.22363e-10	0.204725	0.687	0.497	3.1873e-06
NAP1L1	1.23733e-10	0.180295	0.991	0.975	3.223e-06
TMEM123	1.27653e-10	-0.268943	0.868	0.863	3.32509e-06
MAD2L1	1.29051e-10	0.212976	0.931	0.779	3.36153e-06
H1FX	1.35131e-10	-0.329737	0.238	0.394	3.51988e-06
GBE1	1.39035e-10	0.191429	0.473	0.297	3.62157e-06
ARL4C	1.44631e-10	-0.311142	0.893	0.916	3.76736e-06
BOLA2-SMG1P6	1.47268e-10	0.149236	0.473	0.299	3.83603e-06
UBALD2	1.48218e-10	-0.342877	0.48	0.598	3.86078e-06
OXNAD1	1.48786e-10	-0.285394	0.586	0.675	3.87559e-06
SQLE	1.51998e-10	0.182865	0.668	0.454	3.95924e-06
RIOX2	1.61788e-10	0.190481	0.489	0.311	4.21424e-06
EEF1B2	1.6249e-10	0.15934	1	0.997	4.23254e-06
TK1	1.6465e-10	0.226306	0.918	0.749	4.2888e-06
LINC00539	1.91816e-10	0.119588	0.339	0.189	4.99641e-06
SERINC5	2.06832e-10	-0.222531	0.166	0.32	5.38756e-06
RHOH	2.15339e-10	-0.276059	0.865	0.878	5.60915e-06
PIGP	2.56034e-10	0.168765	0.52	0.353	6.66917e-06
RUVBL2	2.59167e-10	0.229227	0.884	0.754	6.75078e-06
PARP1	2.6744e-10	0.203658	0.959	0.861	6.96629e-06
MT-ND5	2.67658e-10	0.232713	1	0.997	6.97196e-06
OLA1	2.6789e-10	0.191458	0.922	0.798	6.978e-06
ITPR1	2.70149e-10	0.104744	0.464	0.281	7.03683e-06
CEMIP2	2.73291e-10	0.1113	0.354	0.203	7.11869e-06
CCDC85B	2.94169e-10	-0.293239	0.915	0.924	7.66251e-06
NDUFA12	2.94508e-10	-0.237022	0.972	0.949	7.67135e-06
SURF4	3.16123e-10	0.221146	0.897	0.749	8.23436e-06
CLU	3.18237e-10	0.151241	0.364	0.207	8.28943e-06
DNAJB6	3.24252e-10	0.206877	0.815	0.673	8.44612e-06
ETFA	3.40138e-10	0.225284	0.862	0.759	8.85991e-06
MPC2	3.44667e-10	0.193486	0.956	0.871	8.97789e-06
PERP	3.77897e-10	0.15255	0.47	0.299	9.84346e-06
VARS2	3.86282e-10	0.0904451	0.326	0.178	1.00619e-05
RPP30	3.94524e-10	0.153229	0.658	0.467	1.02766e-05
ACOT13	4.14883e-10	0.19203	0.712	0.54	1.08069e-05
SNRPA	4.42174e-10	0.207385	0.966	0.883	1.15178e-05
AUH	4.52323e-10	0.156078	0.417	0.262	1.17821e-05
SPATS2L	4.55775e-10	0.0942626	0.266	0.14	1.1872e-05
GGH	4.66856e-10	0.202945	0.799	0.623	1.21607e-05
CASP3	4.76878e-10	0.236041	0.639	0.471	1.24217e-05
PARVG	4.78738e-10	-0.272645	0.608	0.686	1.24702e-05
CD47	5.06691e-10	-0.255488	0.809	0.834	1.31983e-05
BIN1	5.39579e-10	-0.26725	0.875	0.876	1.40549e-05
ALDH6A1	5.50315e-10	0.111714	0.351	0.2	1.43346e-05
ANXA11	5.5937e-10	-0.216772	0.972	0.97	1.45705e-05
TMEM173	5.69562e-10	0.245282	0.743	0.606	1.4836e-05
UBL5	5.96402e-10	-0.213246	0.972	0.971	1.55351e-05
MZT2B	6.16621e-10	-0.300409	0.687	0.741	1.60617e-05
RAB9A	6.63983e-10	0.133684	0.429	0.266	1.72954e-05
MCM2	7.31776e-10	0.1929	0.69	0.504	1.90613e-05
HLA-C	7.80064e-10	-0.201796	1	0.999	2.03191e-05
CD247	8.01255e-10	-0.22724	0.978	0.946	2.08711e-05
RSL24D1	8.20144e-10	0.212749	0.959	0.903	2.13631e-05
TYMS	8.55651e-10	-0.575037	0.777	0.758	2.2288e-05
ID3	8.56939e-10	-0.215566	0.179	0.324	2.23215e-05
HAT1	8.58238e-10	0.175211	0.762	0.555	2.23554e-05
RAD51C	8.65308e-10	0.180948	0.759	0.584	2.25395e-05
WDR18	9.00971e-10	0.170861	0.639	0.462	2.34685e-05
ELOVL5	9.4975e-10	0.213651	0.906	0.809	2.47391e-05
PDLIM1	9.54015e-10	0.181892	0.467	0.302	2.48502e-05
RTTN	9.75252e-10	0.0752364	0.223	0.11	2.54034e-05
MTX2	9.85987e-10	0.13275	0.558	0.364	2.5683e-05
ARHGAP45	1.02004e-09	-0.279428	0.574	0.649	2.65701e-05
HSPE1	1.03211e-09	0.31641	0.89	0.798	2.68843e-05
DCUN1D5	1.08158e-09	0.181321	0.762	0.596	2.81731e-05
ATP5MG	1.0851e-09	-0.146024	0.997	0.995	2.82646e-05
HTATIP2	1.09399e-09	0.198765	0.715	0.539	2.84961e-05
C9orf78	1.15108e-09	-0.250173	0.768	0.799	2.99832e-05
HBS1L	1.19904e-09	0.155821	0.683	0.489	3.12326e-05
XRCC6	1.21802e-09	0.222897	0.978	0.937	3.1727e-05
GDI2	1.24825e-09	0.165114	0.978	0.92	3.25144e-05
YARS2	1.276e-09	0.100989	0.492	0.305	3.32373e-05
TCP1	1.33309e-09	0.283909	0.871	0.785	3.47243e-05
GOT2	1.35817e-09	0.188144	0.777	0.61	3.53775e-05
CASP9	1.3676e-09	0.116748	0.373	0.222	3.56231e-05
ACAT2	1.36817e-09	0.236209	0.865	0.741	3.5638e-05
SATB1	1.3869e-09	-0.332618	0.649	0.713	3.61259e-05
CYBA	1.44691e-09	-0.216691	0.987	0.985	3.76892e-05
DUT	1.51983e-09	0.213482	0.981	0.932	3.95884e-05
C11orf1	1.52045e-09	0.124889	0.401	0.248	3.96046e-05
LTA4H	1.62216e-09	0.205039	0.824	0.667	4.2254e-05
HCST	1.65322e-09	-0.286663	0.978	0.969	4.3063e-05
IRF1	1.7416e-09	-0.396349	0.768	0.789	4.53651e-05
TMX1	1.75284e-09	0.198176	0.831	0.658	4.56579e-05
MSN	1.79498e-09	-0.278449	0.928	0.927	4.67557e-05
LONP1	1.8098e-09	0.116016	0.411	0.252	4.71417e-05
ELP3	1.82821e-09	0.135198	0.439	0.281	4.76213e-05
CDCA7	1.83645e-09	0.236577	0.846	0.714	4.78358e-05
ZCCHC17	1.96738e-09	0.145249	0.715	0.506	5.12463e-05
ACSL5	1.98605e-09	0.133899	0.464	0.295	5.17327e-05
CLNS1A	2.13062e-09	0.183565	0.9	0.786	5.54985e-05
RACK1	2.15001e-09	0.115605	1	0.999	5.60036e-05
IL9R	2.15227e-09	-0.253831	0.263	0.412	5.60623e-05
SCCPDH	2.19851e-09	0.158487	0.536	0.361	5.72667e-05
MRPS2	2.25693e-09	0.170038	0.708	0.555	5.87886e-05
CCL5	2.35123e-09	0.221699	0.962	0.836	6.12449e-05
LAIR1	2.45764e-09	-0.221192	0.154	0.295	6.40165e-05
DTL	2.51916e-09	0.144405	0.627	0.431	6.5619e-05
DHRS4L2	2.55071e-09	0.144236	0.514	0.337	6.64409e-05
BHLHE40	2.58289e-09	-0.348491	0.875	0.893	6.72791e-05
CDKAL1	2.78131e-09	0.0991227	0.32	0.183	7.24476e-05
TOX	2.84275e-09	0.0948497	0.245	0.128	7.4048e-05
NT5DC1	2.89234e-09	0.167176	0.649	0.457	7.53396e-05
PRDM1	2.94203e-09	0.150975	0.357	0.213	7.6634e-05
TMEM154	3.04462e-09	0.110311	0.329	0.188	7.93063e-05
ZFP36L2	3.04848e-09	-0.347718	0.451	0.556	7.94068e-05
ATP5MC2	3.117e-09	0.144052	1	0.995	8.11916e-05
FAM162A	3.21427e-09	0.317444	0.944	0.845	8.37254e-05
VAMP5	3.62459e-09	-0.258847	0.887	0.883	9.44134e-05
LAT2	3.65754e-09	-0.227598	0.313	0.452	9.52716e-05
RPA3	3.77716e-09	0.190326	0.95	0.885	9.83874e-05
SARS2	3.99657e-09	0.0971596	0.436	0.264	0.000104103
RCAN3	4.01208e-09	-0.203242	0.188	0.325	0.000104507
RPS14	4.20677e-09	0.120358	1	0.998	0.000109578
NDUFV1	4.57848e-09	0.175348	0.947	0.893	0.00011926
GPX7	4.6009e-09	0.135803	0.473	0.304	0.000119844
BNIP3	4.68391e-09	0.390787	0.721	0.57	0.000122006
PNPLA2	4.72331e-09	-0.224056	0.539	0.613	0.000123033
BCAP29	5.13501e-09	0.159781	0.636	0.465	0.000133757
TRMT11	5.29679e-09	0.0882468	0.276	0.152	0.000137971
SAMHD1	5.52672e-09	-0.304632	0.661	0.738	0.00014396
MTHFD1	5.94845e-09	0.155257	0.718	0.539	0.000154945
AIFM2	6.2526e-09	0.0582699	0.201	0.097	0.000162868
KIF3A	6.72939e-09	0.104288	0.411	0.246	0.000175287
EIF3E	6.74092e-09	0.174125	0.975	0.929	0.000175587
SLC25A26	6.94797e-09	0.124378	0.511	0.333	0.000180981
FRA10AC1	7.0859e-09	0.100506	0.404	0.25	0.000184573
CD8A	7.23866e-09	-0.237615	0.987	0.979	0.000188553
PIM2	7.2502e-09	0.206091	0.768	0.597	0.000188853
SORBS3	7.28382e-09	0.0532144	0.201	0.097	0.000189729
ARHGEF1	7.58625e-09	-0.263766	0.853	0.865	0.000197607
CALHM2	7.61634e-09	-0.241491	0.545	0.63	0.00019839
GPX4	8.05985e-09	-0.209608	0.978	0.985	0.000209943
SNAI3	8.39852e-09	-0.208472	0.204	0.339	0.000218765
ICAM3	8.5193e-09	-0.199738	0.975	0.959	0.000221911
CENPH	8.54294e-09	0.166367	0.828	0.69	0.000222527
WRB	9.03937e-09	0.135	0.492	0.331	0.000235457
IL10RA	9.26519e-09	-0.262838	0.596	0.683	0.00024134
H2AFJ	9.46667e-09	-0.242204	0.865	0.875	0.000246588
CLPB	9.93739e-09	0.0983111	0.317	0.184	0.000258849
CCDC28B	1.18584e-08	-0.234496	0.614	0.661	0.000308889
SMCO4	1.19155e-08	0.155731	0.63	0.448	0.000310374
DHCR7	1.19264e-08	0.144999	0.542	0.362	0.00031066
RCHY1	1.2065e-08	0.0922426	0.326	0.189	0.00031427
PCBP1	1.23821e-08	-0.289388	0.599	0.677	0.000322529
MCCC1	1.30254e-08	0.0895715	0.342	0.203	0.000339287
KLF2	1.41584e-08	-0.258034	0.238	0.366	0.000368798
ACAP2	1.44883e-08	-0.237472	0.696	0.735	0.000377391
ZNF580	1.48873e-08	-0.209939	0.307	0.425	0.000387784
ATP5MC3	1.53903e-08	0.176243	0.997	0.987	0.000400886
CSNK1G1	1.5464e-08	0.0870891	0.248	0.134	0.000402805
TXK	1.58832e-08	-0.215582	0.204	0.335	0.000413725
RBMS1	1.59181e-08	-0.214975	0.414	0.535	0.000414636
FARS2	1.60944e-08	0.111667	0.392	0.246	0.000419227
RRM1	1.61654e-08	0.186245	0.893	0.795	0.000421077
RPS9	1.6228e-08	0.131648	1	0.998	0.000422707
ABLIM1	1.65641e-08	-0.210488	0.188	0.324	0.000431461
MRPS9	1.6868e-08	0.129845	0.527	0.355	0.000439378
SSR2	1.75602e-08	-0.177881	0.991	0.987	0.000457408
RPL13	1.91374e-08	0.103131	1	1	0.000498491
RPS11	2.03986e-08	-0.172174	0.997	0.994	0.000531342
FAM102A	2.06164e-08	-0.188964	0.138	0.264	0.000537016
ETHE1	2.22508e-08	-0.220615	0.903	0.897	0.000579589
SLFN5	2.32332e-08	-0.2756	0.386	0.491	0.000605177
ARL6IP4	2.44906e-08	-0.178428	0.987	0.974	0.000637931
PHB2	2.49566e-08	0.160649	0.981	0.949	0.000650069
NAMPT	2.51709e-08	0.150252	0.74	0.561	0.000655652
PECAM1	2.53002e-08	-0.242553	0.53	0.615	0.000659018
C12orf57	2.54235e-08	-0.286867	0.918	0.91	0.00066223
HSD17B8	2.60746e-08	0.118991	0.53	0.356	0.00067919
HSP90AA1	2.63086e-08	0.251701	0.994	0.99	0.000685286
UBASH3B	2.71796e-08	-0.165114	0.116	0.24	0.000707973
CCT3	2.73583e-08	0.201872	0.944	0.874	0.000712629
MRPL4	2.74169e-08	0.189716	0.828	0.727	0.000714156
SRGN	2.74237e-08	0.196658	0.997	0.969	0.000714333
SNRNP25	2.75524e-08	0.177375	0.815	0.667	0.000717685
IL17RA	2.78895e-08	-0.228661	0.295	0.411	0.000726466
SCAMP2	2.79636e-08	0.193813	0.915	0.826	0.000728397
SPINT2	2.80631e-08	-0.221203	0.226	0.375	0.000730989
LGALS1	2.8636e-08	-0.26627	0.997	0.997	0.000745911
TCAF2	2.87318e-08	0.0970354	0.408	0.255	0.000748406
CCNH	2.95342e-08	0.149737	0.715	0.539	0.000769306
CREM	3.02577e-08	0.217534	0.737	0.579	0.000788152
MAD1L1	3.08016e-08	0.221639	0.737	0.596	0.000802319
NINJ1	3.13799e-08	-0.236988	0.646	0.714	0.000817383
WDR54	3.1673e-08	0.2313	0.925	0.825	0.000825019
STAMBP	3.26073e-08	0.152501	0.624	0.448	0.000849354
NOP58	4.04543e-08	0.18421	0.815	0.681	0.00105375
ESYT1	4.14789e-08	-0.294014	0.621	0.687	0.00108044
IDI1	4.51484e-08	0.209808	0.774	0.645	0.00117603
RPL15	4.55271e-08	0.109508	1	0.998	0.00118589
FAAP20	4.60126e-08	-0.235059	0.555	0.614	0.00119854
ALDOA	4.94837e-08	0.234989	1	0.979	0.00128895
ASB1	5.02578e-08	0.102791	0.417	0.266	0.00130912
STK4	5.24894e-08	-0.247499	0.834	0.845	0.00136724
DLD	5.27087e-08	0.176981	0.724	0.574	0.00137296
C9orf64	5.29448e-08	0.0716097	0.263	0.144	0.00137911
RUVBL1	5.63275e-08	0.137253	0.618	0.445	0.00146722
SLFN11	5.89956e-08	0.0733384	0.219	0.117	0.00153672
CDC123	6.04294e-08	0.186601	0.809	0.696	0.00157406
C17orf49	6.1837e-08	0.16297	0.602	0.432	0.00161073
THG1L	6.25482e-08	0.0861031	0.389	0.24	0.00162926
CD79B	6.26545e-08	-0.231333	0.279	0.394	0.00163202
TOMM34	6.32814e-08	0.10647	0.408	0.258	0.00164835
ITGB1	6.77018e-08	0.139401	0.614	0.442	0.0017635
ISOC2	6.78283e-08	0.152504	0.611	0.432	0.00176679
MRPS18B	6.78752e-08	0.178951	0.743	0.605	0.00176801
TMEM160	6.89373e-08	-0.203844	0.893	0.878	0.00179568
ATP5F1B	6.92529e-08	0.159164	0.994	0.985	0.0018039
OST4	6.99837e-08	-0.173976	0.984	0.981	0.00182293
CXorf40A	7.51606e-08	0.104682	0.423	0.268	0.00195778
MRPL13	7.68168e-08	0.178196	0.853	0.761	0.00200092
C11orf49	7.96205e-08	0.0998483	0.342	0.207	0.00207395
EPRS	8.27996e-08	0.180887	0.862	0.72	0.00215676
AC004687.1	8.72123e-08	-0.283432	0.505	0.592	0.00227171
MYL6B	8.8034e-08	0.168672	0.859	0.703	0.00229311
ANTXR2	8.92412e-08	0.123164	0.414	0.274	0.00232455
PRMT2	9.48312e-08	-0.242366	0.837	0.84	0.00247016
EAF2	9.72969e-08	0.114853	0.505	0.328	0.00253439
TMEM97	9.85818e-08	0.111438	0.492	0.334	0.00256786
TTC32	1.00727e-07	0.116462	0.473	0.316	0.00262372
INPP4B	1.03795e-07	0.118308	0.552	0.384	0.00270364
LAMTOR4	1.05087e-07	-0.202291	0.944	0.941	0.0027373
COMMD3	1.05576e-07	0.0493078	0.223	0.117	0.00275004
ABI2	1.06244e-07	0.109223	0.386	0.246	0.00276744
IKBIP	1.11155e-07	0.196626	0.746	0.607	0.00289537
RMDN1	1.12408e-07	0.122836	0.658	0.483	0.00292801
RPLP1	1.14925e-07	0.104139	1	0.999	0.00299355
COX4I1	1.18357e-07	-0.119704	1	0.997	0.00308297
RENBP	1.23792e-07	-0.157623	0.107	0.227	0.00322455
INF2	1.24276e-07	-0.174206	0.144	0.265	0.00323714
PRIMPOL	1.24366e-07	0.0683494	0.31	0.181	0.00323947
SMCHD1	1.25796e-07	-0.24962	0.536	0.604	0.00327674
IKZF1	1.31464e-07	-0.249815	0.621	0.685	0.00342439
SSB	1.35125e-07	0.212642	0.89	0.777	0.00351975
NT5C3B	1.37319e-07	0.0973262	0.42	0.271	0.00357687
NOC2L	1.38123e-07	0.0923265	0.605	0.402	0.00359784
MIS18A	1.40115e-07	0.126452	0.68	0.505	0.00364973
SPRYD7	1.4233e-07	0.0481494	0.241	0.131	0.00370741
COPG2	1.47106e-07	0.0748848	0.301	0.176	0.00383182
TMEM204	1.53972e-07	-0.200722	0.254	0.376	0.00401066
SOCS1	1.55561e-07	-0.317253	0.119	0.236	0.00405204
SSBP3	1.56846e-07	-0.169823	0.163	0.285	0.00408553
NFS1	1.59606e-07	0.0749617	0.404	0.251	0.0041574
MZT2A	1.59639e-07	-0.227435	0.749	0.774	0.00415827
EPSTI1	1.6071e-07	-0.221027	0.235	0.351	0.00418616
RPL35	1.65609e-07	0.121351	1	0.997	0.00431378
PSMB2	1.66539e-07	0.185919	0.975	0.92	0.00433801
SEPT6	1.84497e-07	-0.199764	0.984	0.974	0.00480579
RIN3	1.85693e-07	-0.197288	0.182	0.304	0.00483692
TUFM	1.88862e-07	0.170778	0.959	0.927	0.00491947
POLR2H	1.99739e-07	0.19639	0.85	0.753	0.00520281
AP002884.1	2.0175e-07	0.165057	0.313	0.197	0.00525519
UQCRC1	2.08151e-07	0.157418	0.975	0.929	0.00542191
EXOSC5	2.13036e-07	0.12306	0.489	0.331	0.00554916
COMMD6	2.13185e-07	-0.185826	0.956	0.952	0.00555306
NBDY	2.14622e-07	-0.24231	0.734	0.758	0.00559048
MRPL39	2.29533e-07	0.149349	0.636	0.473	0.00597887
CCT2	2.36021e-07	0.219	0.897	0.806	0.00614789
P4HA1	2.43274e-07	0.191207	0.621	0.47	0.00633679
GYPC	2.45412e-07	-0.173367	0.991	0.986	0.0063925
TFDP2	2.47882e-07	0.096496	0.445	0.294	0.00645682
DNAJC18	2.52447e-07	0.0881826	0.238	0.135	0.00657574
FAU	2.60135e-07	-0.107118	1	0.999	0.006776
ISYNA1	2.62028e-07	0.106369	0.571	0.397	0.0068253
HSDL2	2.86877e-07	0.126039	0.58	0.417	0.00747256
FOXP1	2.90841e-07	-0.232498	0.367	0.458	0.00757582
MFNG	3.00089e-07	-0.22753	0.743	0.753	0.00781671
CYTIP	3.00127e-07	0.203661	0.969	0.949	0.00781771
SNRPB2	3.00136e-07	0.185794	0.922	0.84	0.00781794
NME7	3.06226e-07	0.0968536	0.498	0.337	0.00797658
ANKRD37	3.23944e-07	0.316329	0.382	0.262	0.0084381
FAM96B	3.30976e-07	0.145247	0.984	0.949	0.00862126
TIPIN	3.32619e-07	0.105996	0.476	0.326	0.00866406
C12orf75	3.3813e-07	-0.19608	0.975	0.961	0.00880762
BZW2	3.51339e-07	0.175859	0.643	0.497	0.00915169
HSH2D	3.53677e-07	0.1308	0.727	0.567	0.00921258
CD9	3.58393e-07	-0.254041	0.16	0.278	0.00933542
REXO2	3.82458e-07	0.184601	0.837	0.735	0.00996226
VKORC1	3.90012e-07	0.0726937	0.304	0.182	0.010159
IMPACT	4.03184e-07	0.0663387	0.213	0.117	0.0105021
EDF1	4.07455e-07	-0.153931	0.991	0.987	0.0106134
PSMA7	4.14158e-07	-0.178387	0.978	0.982	0.010788
NDFIP1	4.14956e-07	-0.210527	0.815	0.813	0.0108088
HSPBP1	4.17534e-07	0.09214	0.442	0.293	0.0108759
C1QBP	4.22418e-07	0.188893	0.871	0.754	0.0110032
HPF1	4.25568e-07	0.132363	0.577	0.412	0.0110852
E2F4	4.40293e-07	0.157668	0.464	0.321	0.0114688
PA2G4	4.42425e-07	0.161003	0.987	0.968	0.0115243
ACP1	4.53683e-07	0.154341	0.953	0.883	0.0118175
PCCB	4.62472e-07	0.12149	0.549	0.394	0.0120465
PPIL1	4.68674e-07	0.112638	0.417	0.285	0.012208
MRPS33	4.70844e-07	0.13938	0.765	0.599	0.0122645
CHCHD2	4.77969e-07	0.111391	1	0.998	0.0124501
NPM3	4.7924e-07	0.0999551	0.342	0.219	0.0124833
SELENOS	4.98705e-07	0.140874	0.618	0.462	0.0129903
ST8SIA4	4.9981e-07	0.141177	0.655	0.493	0.013019
HSPA1A	5.16454e-07	0.174971	0.658	0.513	0.0134526
HMGN5	5.28661e-07	0.0674874	0.216	0.12	0.0137706
PRDX2	5.3612e-07	0.151456	0.994	0.979	0.0139649
LITAF	5.4247e-07	0.226619	0.893	0.794	0.0141302
PFDN5	5.43751e-07	-0.137114	0.997	0.991	0.0141636
RARS	5.4605e-07	0.0909443	0.508	0.34	0.0142235
TKFC	5.52573e-07	0.0692415	0.282	0.168	0.0143934
MYL6	5.67354e-07	-0.181019	1	0.998	0.0147784
CDC6	5.75877e-07	0.176418	0.589	0.45	0.0150004
REXO5	5.91655e-07	0.0696085	0.229	0.13	0.0154114
NUDT1	5.96986e-07	-0.194355	0.934	0.915	0.0155503
RPL22	6.0266e-07	0.127782	1	0.995	0.0156981
PBK	6.05845e-07	0.118096	0.545	0.385	0.0157811
SUGT1	6.0897e-07	0.162417	0.84	0.698	0.0158625
RAB27A	6.12959e-07	0.185603	0.831	0.701	0.0159663
TMEM14B	6.1395e-07	0.143521	0.944	0.86	0.0159922
VDAC3	6.14767e-07	0.168826	0.969	0.91	0.0160134
DCTD	6.14894e-07	0.128064	0.567	0.412	0.0160168
CAMK2G	6.30506e-07	-0.206938	0.502	0.571	0.0164234
AP2B1	6.62255e-07	0.131924	0.646	0.478	0.0172504
SNRPA1	6.70469e-07	0.172393	0.887	0.813	0.0174644
HLA-DMB	6.83036e-07	0.106917	0.429	0.287	0.0177917
KLF6	6.92676e-07	-0.249891	0.875	0.886	0.0180428
RPS23	6.94248e-07	0.0941809	1	0.999	0.0180838
CYP51A1	7.05292e-07	0.0888652	0.436	0.286	0.0183714
MAPK13	7.07316e-07	0.0884316	0.32	0.202	0.0184242
KDM5B	7.1318e-07	-0.223252	0.21	0.323	0.0185769
CTNNA1	7.15042e-07	0.0764905	0.219	0.123	0.0186254
STOM	7.20657e-07	0.119128	0.498	0.344	0.0187717
XPO5	7.23723e-07	0.0690427	0.339	0.209	0.0188515
CFL1	7.46717e-07	-0.176033	1	0.998	0.0194505
SNHG8	7.63935e-07	0.176906	0.768	0.624	0.019899
KCNAB2	7.71051e-07	0.158348	0.878	0.773	0.0200843
PTRH2	7.72386e-07	0.0805844	0.376	0.239	0.0201191
POLR2D	7.73672e-07	0.120766	0.671	0.49	0.0201526
MLLT11	7.84085e-07	-0.183	0.263	0.376	0.0204238
MTO1	8.11491e-07	0.0915325	0.429	0.288	0.0211377
ZCRB1	8.21415e-07	0.141777	0.897	0.764	0.0213962
HMOX2	8.89792e-07	-0.196146	0.837	0.834	0.0231773
CDKN1B	8.93923e-07	-0.249566	0.498	0.551	0.0232849
ATP5F1D	9.02763e-07	-0.42417	0.345	0.443	0.0235152
PPID	9.26274e-07	0.300591	0.658	0.537	0.0241276
TUBA1B	9.29896e-07	0.185976	0.997	0.958	0.0242219
PGK1	9.31327e-07	0.263683	1	0.989	0.0242592
RPF2	9.33895e-07	0.0922077	0.417	0.276	0.0243261
NDFIP2	9.35136e-07	0.135105	0.68	0.517	0.0243584
TMEM106C	9.40542e-07	0.174111	0.931	0.824	0.0244992
TMED8	9.52529e-07	0.0659291	0.251	0.144	0.0248115
EGLN3	9.58392e-07	-0.217864	0.138	0.247	0.0249642
RASGRP2	9.6728e-07	-0.202548	0.445	0.55	0.0251957
COX20	9.74258e-07	0.134285	0.661	0.491	0.0253775
IPO5	9.80681e-07	0.111376	0.52	0.368	0.0255448
PLPP1	1.01874e-06	-0.204636	0.342	0.435	0.0265362
LIME1	1.04229e-06	-0.25588	0.643	0.69	0.0271496
SCD	1.04295e-06	0.111653	0.599	0.435	0.0271667
PPP1CC	1.11326e-06	0.151104	0.953	0.847	0.0289982
TIPRL	1.13211e-06	0.160377	0.818	0.706	0.0294892
MAPK8	1.13531e-06	0.0644959	0.295	0.178	0.0295726
C1orf162	1.15001e-06	-0.243786	0.176	0.278	0.0299553
TNFSF8	1.20877e-06	-0.187479	0.154	0.265	0.031486
MCOLN2	1.22404e-06	0.0663886	0.288	0.173	0.0318838
SNRPD1	1.22756e-06	0.171809	0.962	0.92	0.0319754
AC084033.3	1.22992e-06	0.13358	0.718	0.555	0.0320369
MRPL3	1.24183e-06	0.1916	0.752	0.626	0.0323471
ABHD17A	1.28296e-06	-0.18229	0.191	0.296	0.0334187
HIST1H1D	1.29154e-06	-0.347961	0.755	0.801	0.033642
GMNN	1.29966e-06	0.137764	0.815	0.669	0.0338535
OCIAD1	1.30181e-06	0.159707	0.837	0.753	0.0339095
NCAPH	1.33662e-06	0.129893	0.806	0.642	0.0348163
ATP6V0E2	1.33888e-06	-0.200813	0.721	0.759	0.0348752
MRPL34	1.33941e-06	-0.174345	0.871	0.857	0.034889
PAAF1	1.3408e-06	0.108441	0.467	0.323	0.0349252
RPL39	1.3489e-06	0.121091	1	0.996	0.0351362
RFC4	1.3548e-06	0.165322	0.806	0.647	0.0352898
YY1	1.35655e-06	-0.192832	0.417	0.501	0.0353355
EIF5A	1.35972e-06	-0.17935	0.972	0.956	0.0354179
ZYX	1.43648e-06	-0.335066	0.514	0.57	0.0374175
FIGNL1	1.44448e-06	0.0809864	0.386	0.253	0.0376257
RPS29	1.49976e-06	-0.181295	0.994	0.987	0.0390657
ZAP70	1.50968e-06	-0.214708	0.897	0.922	0.0393241
BUB3	1.51839e-06	0.18166	0.975	0.927	0.0395511
ERI1	1.54704e-06	0.0846444	0.549	0.379	0.0402974
NME2	1.58742e-06	0.144882	0.937	0.844	0.0413491
ERCC8	1.63427e-06	0.0492591	0.207	0.114	0.0425695
OSM	1.69921e-06	-0.386265	0.564	0.643	0.0442611
JAML	1.71022e-06	-0.228128	0.552	0.621	0.0445478
CCDC51	1.73885e-06	0.0813155	0.411	0.267	0.0452937
SF3B6	1.76859e-06	0.15147	0.934	0.882	0.0460683
BLVRB	1.77165e-06	0.160112	0.712	0.56	0.046148
NADSYN1	1.78597e-06	0.122969	0.68	0.517	0.0465209
TP53TG1	1.82128e-06	0.114058	0.464	0.329	0.0474408
CCT7	1.94275e-06	0.17977	0.925	0.882	0.0506049
STK32C	1.96723e-06	0.154554	0.574	0.435	0.0512423
TPMT	1.99983e-06	0.090781	0.27	0.164	0.0520916
RCC1	2.05219e-06	0.103995	0.605	0.433	0.0534554
TSPAN32	2.06249e-06	-0.183657	0.172	0.274	0.0537239
VPS28	2.14575e-06	-0.171303	0.922	0.892	0.0558925
TTLL1	2.17084e-06	0.0649759	0.245	0.145	0.056546
SELPLG	2.19221e-06	-0.223098	0.937	0.947	0.0571027
ORAI1	2.20191e-06	-0.166199	0.232	0.346	0.0573553
CAPZB	2.21818e-06	-0.14927	1	0.99	0.0577791
MT2A	2.25976e-06	-0.0142863	0.934	0.938	0.0588623
RPL39L	2.27292e-06	0.145775	0.831	0.682	0.059205
BCKDHA	2.31316e-06	0.123718	0.455	0.318	0.0602531
LYPLA1	2.31858e-06	0.142797	0.818	0.683	0.0603943
CAMK4	2.3286e-06	-0.22306	0.549	0.606	0.0606554
HINT1	2.34365e-06	0.1017	1	0.997	0.0610475
DKC1	2.34896e-06	0.156084	0.599	0.467	0.0611858
PTPRCAP	2.3576e-06	-0.242923	0.63	0.643	0.0614107
LIPA	2.39137e-06	0.0804744	0.342	0.217	0.0622905
KLHL12	2.41353e-06	0.0787948	0.342	0.219	0.0628676
LCP2	2.47377e-06	-0.211716	0.875	0.878	0.0644366
GCA	2.55308e-06	0.0683321	0.339	0.215	0.0665025
QTRT1	2.55687e-06	0.0892503	0.379	0.25	0.0666012
IVD	2.56331e-06	0.0695051	0.48	0.322	0.0667691
ALKBH2	2.62327e-06	0.0483755	0.204	0.113	0.068331
SEC63	2.64996e-06	0.112042	0.668	0.502	0.0690262
DGKA	2.69599e-06	-0.223221	0.58	0.624	0.0702251
GM2A	2.69943e-06	0.0652228	0.229	0.132	0.0703148
MRPL22	2.71666e-06	0.140588	0.868	0.755	0.0707636
TAF9	2.73376e-06	0.145697	0.721	0.598	0.071209
UXT	2.73871e-06	-0.167793	0.969	0.965	0.0713379
CDK2AP2	2.86402e-06	-0.191523	0.953	0.939	0.0746019
TRIM22	2.94921e-06	-0.234804	0.304	0.416	0.076821
TOMM7	2.96762e-06	-0.183934	0.972	0.975	0.0773004
NOB1	3.03062e-06	0.135215	0.793	0.655	0.0789417
RAP1B	3.0749e-06	-0.153742	0.956	0.93	0.0800949
GALK2	3.14648e-06	0.062023	0.364	0.234	0.0819595
GADD45B	3.15105e-06	-0.258196	0.718	0.721	0.0820785
BTD	3.23439e-06	0.0807696	0.332	0.214	0.0842494
SERBP1	3.2783e-06	0.141044	0.969	0.963	0.0853931
STOML2	3.42727e-06	0.140046	0.944	0.848	0.0892735
SYNRG	3.44336e-06	-0.215226	0.552	0.605	0.0896928
FTH1	3.51613e-06	0.148744	1	0.998	0.0915883
CD53	3.53873e-06	-0.171889	0.978	0.966	0.0921768
TSPAN4	3.59586e-06	-0.147845	0.163	0.264	0.0936649
PDLIM7	3.62487e-06	-0.180645	0.392	0.472	0.0944205
CD81	3.6416e-06	0.0368874	0.282	0.172	0.0948563
UBE2L6	3.6719e-06	-0.207413	0.887	0.89	0.0956456
RHEB	3.68701e-06	-0.231697	0.784	0.786	0.0960392
TEDC2	3.69414e-06	0.0580786	0.282	0.171	0.096225
GSTZ1	3.7531e-06	0.0935846	0.445	0.307	0.0977606
HLA-F	3.76813e-06	-0.187874	0.853	0.849	0.0981521
SH2D1A	3.92999e-06	0.178665	0.824	0.732	0.102368
NFKBIA	4.12915e-06	-0.300892	0.423	0.503	0.107556
PELP1	4.24336e-06	0.0910906	0.552	0.402	0.110531
GNL2	4.25886e-06	0.116411	0.589	0.443	0.110935
JAKMIP1	4.29817e-06	0.0657236	0.357	0.232	0.111959
ACOX3	4.33541e-06	0.0634051	0.251	0.151	0.112929
PGGHG	4.45688e-06	-0.150306	0.138	0.244	0.116093
DDX41	4.51815e-06	0.0918334	0.696	0.52	0.117689
WARS2	4.67696e-06	0.0520463	0.295	0.183	0.121825
PDLIM2	4.71304e-06	-0.213859	0.373	0.452	0.122765
FUCA2	4.72913e-06	0.0856814	0.317	0.202	0.123184
ACACA	4.78725e-06	0.0695714	0.26	0.158	0.124698
RORA	4.8129e-06	0.12325	0.439	0.301	0.125366
AGTRAP	4.83883e-06	-0.261491	0.636	0.666	0.126042
CDC45	4.83974e-06	0.130627	0.652	0.506	0.126066
FBXO6	5.03557e-06	-0.153893	0.223	0.324	0.131167
MSH6	5.11105e-06	0.117448	0.533	0.379	0.133133
CYCS	5.14485e-06	0.189013	0.94	0.862	0.134013
EXOSC9	5.29091e-06	0.127864	0.677	0.531	0.137818
NAA50	5.54349e-06	0.140004	0.605	0.445	0.144397
ACTN1	5.69035e-06	-0.208338	0.439	0.535	0.148222
RHEBL1	5.75991e-06	0.0727505	0.417	0.275	0.150034
MOSPD3	5.84413e-06	-0.234564	0.571	0.604	0.152228
DECR1	5.85631e-06	0.128662	0.906	0.772	0.152545
POFUT1	5.88238e-06	0.0359362	0.232	0.133	0.153224
RPL14	5.90424e-06	0.0955191	1	0.999	0.153794
BTG1	5.96631e-06	-0.26295	0.715	0.731	0.15541
MYH9	5.98135e-06	-0.296162	0.931	0.913	0.155802
SMIM37	6.08806e-06	0.102555	0.765	0.598	0.158582
CCT5	6.42407e-06	0.222224	0.884	0.834	0.167334
PSAT1	6.55031e-06	0.243103	0.818	0.709	0.170623
PRDX1	6.62964e-06	0.209845	0.984	0.96	0.172689
SP100	6.65964e-06	-0.192735	0.793	0.797	0.17347
PTPRC	6.70314e-06	-0.175455	0.984	0.986	0.174603
MTFR2	6.72759e-06	0.0804914	0.517	0.363	0.17524
C11orf21	6.75628e-06	-0.173087	0.238	0.339	0.175988
PPME1	6.80926e-06	0.0714541	0.408	0.272	0.177368
GTF2H5	6.94773e-06	0.106452	0.715	0.554	0.180975
CTSH	7.24063e-06	0.171164	0.715	0.575	0.188604
NPRL3	7.31079e-06	0.0640969	0.398	0.264	0.190431
MYL12B	7.34692e-06	-0.107702	0.997	0.992	0.191372
NIT2	7.42581e-06	0.125815	0.63	0.5	0.193427
TCF19	7.47246e-06	0.166437	0.608	0.474	0.194643
MIF	7.53841e-06	0.131357	1	0.997	0.196361
UCK2	7.78552e-06	0.0972303	0.467	0.324	0.202797
HSD17B12	7.83016e-06	0.0991756	0.561	0.409	0.20396
PXN	8.03645e-06	-0.193865	0.502	0.592	0.209333
SLC39A8	8.04249e-06	0.154443	0.724	0.602	0.209491
MRM3	8.13241e-06	0.0690317	0.364	0.237	0.211833
CDCA7L	8.21478e-06	0.096537	0.602	0.439	0.213979
SMARCA5	8.31596e-06	0.102517	0.727	0.551	0.216614
TLN1	8.38934e-06	-0.2203	0.721	0.729	0.218526
ATPAF2	8.59061e-06	0.0602165	0.298	0.188	0.223768
NAF1	8.60767e-06	0.0472344	0.245	0.146	0.224212
ARF5	8.67167e-06	-0.138592	0.962	0.947	0.22588
YWHAE	8.69502e-06	0.128432	0.95	0.877	0.226488
LYST	8.74046e-06	0.112789	0.458	0.331	0.227672
TBC1D10C	8.90636e-06	-0.198671	0.871	0.872	0.231993
NDUFA3	9.05391e-06	-0.20752	0.724	0.747	0.235836
ERG28	9.25624e-06	0.126558	0.759	0.619	0.241107
HAX1	9.39973e-06	0.16329	0.922	0.867	0.244844
TNFRSF25	9.4593e-06	-0.14522	0.188	0.287	0.246396
ARID5B	9.59062e-06	0.115535	0.687	0.507	0.249817
TCEA1	9.675e-06	0.140829	0.969	0.93	0.252014
CFAP36	9.67885e-06	0.0993973	0.549	0.396	0.252115
CD68	9.75923e-06	0.117016	0.464	0.333	0.254209
MMP25	9.79179e-06	-0.195191	0.288	0.392	0.255057
BRCA1	9.84328e-06	0.102505	0.621	0.459	0.256398
ILVBL	9.92309e-06	0.0959746	0.574	0.435	0.258477
COPS9	1.01731e-05	-0.171633	0.724	0.733	0.264988
PQLC3	1.02036e-05	0.111248	0.486	0.354	0.265784
TNF	1.03576e-05	0.114617	0.539	0.388	0.269795
COQ5	1.04514e-05	0.11179	0.511	0.38	0.272239
SYTL1	1.04535e-05	-0.200049	0.599	0.656	0.272292
CCM2	1.05989e-05	-0.216223	0.605	0.627	0.27608
EXT2	1.07476e-05	0.0568633	0.285	0.18	0.279955
EIF4EBP3	1.08165e-05	0.071855	0.232	0.14	0.281749
UBE4B	1.0907e-05	0.0454785	0.332	0.212	0.284104
MCM6	1.09211e-05	0.165603	0.759	0.619	0.284473
RAD50	1.09929e-05	0.0819193	0.404	0.276	0.286343
ADD3	1.13057e-05	-0.190106	0.834	0.839	0.294491
CD37	1.14239e-05	-0.146856	0.984	0.962	0.297571
NDUFS5	1.16668e-05	0.153014	0.987	0.957	0.303897
LIMS1	1.16819e-05	0.102994	0.655	0.503	0.30429
DDX1	1.17358e-05	0.0667698	0.411	0.276	0.305694
HNRNPA2B1	1.17649e-05	0.134887	0.997	0.992	0.306453
MRPL51	1.17904e-05	0.126696	0.966	0.917	0.307116
MAPKAPK3	1.18572e-05	-0.170565	0.862	0.845	0.308856
CDIP1	1.22527e-05	-0.19176	0.464	0.532	0.319158
CDC25C	1.22776e-05	0.0741439	0.376	0.252	0.319807
OCIAD2	1.22895e-05	-0.183799	0.831	0.825	0.320117
C15orf39	1.26497e-05	-0.169765	0.251	0.347	0.329501
ARHGAP4	1.28164e-05	-0.202949	0.687	0.712	0.333842
CCNC	1.29044e-05	0.100781	0.605	0.464	0.336134
MRPL19	1.29221e-05	0.0986783	0.571	0.424	0.336595
MNAT1	1.31027e-05	0.10221	0.586	0.44	0.3413
TARS2	1.32455e-05	0.0848095	0.37	0.251	0.345019
DCPS	1.33606e-05	0.11139	0.837	0.684	0.348018
MCM3	1.35468e-05	0.184535	0.828	0.687	0.352867
TESPA1	1.35564e-05	-0.178038	0.348	0.44	0.353118
LAMP2	1.36287e-05	0.0911653	0.567	0.409	0.355
ADPRHL2	1.36547e-05	0.0987524	0.618	0.459	0.355677
FBXO4	1.3712e-05	0.0617537	0.307	0.196	0.357171
SLC12A7	1.40223e-05	-0.149555	0.144	0.235	0.365253
RTRAF	1.40822e-05	0.117713	0.987	0.964	0.366812
COX5A	1.43818e-05	0.120822	0.997	0.989	0.374616
AASDH	1.44162e-05	0.0387115	0.223	0.131	0.375512
CUL5	1.46036e-05	0.0816799	0.451	0.311	0.380396
SRFBP1	1.46918e-05	0.036249	0.245	0.147	0.382692
PPP1R18	1.48921e-05	-0.161647	0.947	0.936	0.38791
MCM5	1.49519e-05	0.145708	0.821	0.705	0.389468
GSS	1.51464e-05	0.109544	0.768	0.608	0.394533
TXNL4B	1.51559e-05	0.0552848	0.241	0.147	0.39478
ETS1	1.54523e-05	-0.22926	0.558	0.601	0.402502
PRMT1	1.55421e-05	0.134975	0.868	0.766	0.404841
FKBP15	1.55754e-05	0.0405882	0.376	0.245	0.405708
TOB1	1.58332e-05	-0.18137	0.345	0.433	0.412424
COA4	1.59931e-05	0.129058	0.752	0.611	0.416588
CEP68	1.6059e-05	0.0573644	0.263	0.164	0.418304
AKR1B1	1.64321e-05	0.152096	0.947	0.836	0.428023
TENT5C	1.64801e-05	0.0888308	0.624	0.47	0.429274
PHB	1.6592e-05	0.164133	0.865	0.778	0.432189
MAD2L2	1.67481e-05	-0.184353	0.868	0.859	0.436255
AKIRIN2	1.67762e-05	0.131052	0.611	0.479	0.436987
WDR45B	1.70763e-05	0.0871684	0.502	0.359	0.444804
PARP9	1.72122e-05	-0.182249	0.219	0.308	0.448342
BIRC5	1.75661e-05	0.158271	0.85	0.697	0.457562
IMPA1	1.79238e-05	0.0921035	0.442	0.308	0.46688
PGRMC1	1.79504e-05	0.100678	0.577	0.43	0.467571
NIPSNAP1	1.82704e-05	0.113176	0.69	0.542	0.475908
SUPT16H	1.82715e-05	0.118752	0.818	0.685	0.475936
C12orf45	1.84332e-05	0.0743339	0.411	0.284	0.480149
PFKFB4	1.84485e-05	0.0648368	0.37	0.249	0.480546
NDUFB5	1.84927e-05	0.133785	0.928	0.82	0.481699
YARS	1.85226e-05	0.138751	0.89	0.763	0.482477
THOC7	1.85909e-05	0.137344	0.893	0.783	0.484255
C16orf58	1.86427e-05	0.0664765	0.313	0.204	0.485606
EIF2AK2	1.88387e-05	0.0855767	0.47	0.335	0.49071
SNRPB	1.88675e-05	0.121537	0.981	0.943	0.491459
LYRM7	1.91003e-05	0.0815524	0.37	0.25	0.497524
CHPF	1.95813e-05	0.0523838	0.238	0.146	0.510052
PRKCB	1.96609e-05	-0.21041	0.577	0.619	0.512126
LASP1	1.97259e-05	-0.196942	0.611	0.638	0.513819
SDHAF4	1.9865e-05	0.0418298	0.241	0.146	0.517445
SNRPE	1.99556e-05	0.132181	0.887	0.806	0.519802
VRK1	2.03564e-05	0.134283	0.824	0.69	0.530244
THOP1	2.0929e-05	0.0960226	0.561	0.419	0.54516
PNRC1	2.10736e-05	-0.229904	0.571	0.619	0.548926
RASSF1	2.16838e-05	-0.206219	0.831	0.803	0.564821
IQCB1	2.18143e-05	0.0845463	0.429	0.297	0.568218
ARL6IP5	2.20598e-05	-0.164941	0.994	0.972	0.574614
IFT57	2.22986e-05	0.058423	0.408	0.274	0.580835
EMD	2.24566e-05	0.144509	0.925	0.868	0.58495
CHMP4B	2.25847e-05	-0.171571	0.295	0.377	0.588287
PRDX5	2.26515e-05	0.131759	0.978	0.949	0.590025
CCT6A	2.27993e-05	0.182656	0.931	0.847	0.593877
MIB1	2.30265e-05	0.038304	0.329	0.211	0.599794
GFPT1	2.31816e-05	0.0579081	0.395	0.267	0.603834
MINDY3	2.32055e-05	0.0519644	0.201	0.118	0.604457
EXOSC8	2.32604e-05	0.166461	0.843	0.763	0.605887
NUP37	2.34318e-05	0.111758	0.721	0.564	0.610352
MRPL45	2.34634e-05	0.0943486	0.514	0.374	0.611176
EPOR	2.39104e-05	0.0490596	0.348	0.228	0.622818
CAP1	2.48967e-05	-0.160255	0.991	0.978	0.648508
TPST2	2.60947e-05	-0.239245	0.677	0.691	0.679715
SAAL1	2.62254e-05	0.0735825	0.486	0.346	0.68312
CCDC47	2.63493e-05	0.11424	0.674	0.534	0.686347
SSBP1	2.63765e-05	0.122588	0.922	0.88	0.687054
ANKRD44	2.6925e-05	-0.193608	0.693	0.72	0.701342
CHID1	2.70151e-05	0.101971	0.633	0.493	0.703691
DUS3L	2.75659e-05	0.0580786	0.345	0.23	0.718037
DYNC1LI2	2.77563e-05	0.0525489	0.382	0.258	0.722996
GNPNAT1	2.7861e-05	0.0545412	0.207	0.124	0.725724
GOLPH3L	2.82992e-05	0.0482711	0.232	0.141	0.737138
SYNE1	2.83863e-05	0.0601779	0.342	0.228	0.739406
TCERG1	2.85893e-05	0.1116	0.799	0.652	0.744694
NEK7	2.86102e-05	0.0463551	0.21	0.125	0.745238
CCNG1	2.86185e-05	0.147697	0.868	0.752	0.745454
RNF166	2.90552e-05	-0.179537	0.285	0.369	0.75683
PPM1G	2.90987e-05	-0.159113	0.903	0.887	0.757962
TMC6	2.91577e-05	-0.184236	0.774	0.76	0.759499
COPS2	2.91632e-05	0.112965	0.705	0.557	0.759643
TRGV3	2.92574e-05	0.053881	0.223	0.137	0.762098
TBRG4	2.93743e-05	0.077584	0.552	0.411	0.765142
RALB	2.95764e-05	0.0811344	0.527	0.388	0.770406
ENOSF1	2.97772e-05	0.0795992	0.58	0.433	0.775636
OSBPL8	3.00846e-05	-0.18788	0.727	0.722	0.783644
TMA16	3.02972e-05	0.063473	0.332	0.223	0.789182
C16orf95	3.07625e-05	0.0489505	0.313	0.202	0.801302
SLC30A9	3.1235e-05	0.0809511	0.439	0.309	0.813609
TMC8	3.13217e-05	-0.196364	0.545	0.588	0.815869
CD48	3.15852e-05	-0.162391	0.975	0.967	0.82273
SIGIRR	3.17661e-05	-0.172439	0.702	0.722	0.827443
TBPL1	3.18845e-05	0.0867048	0.502	0.359	0.830529
EIF3K	3.22075e-05	-0.104981	0.997	0.994	0.83894
NARS2	3.28871e-05	0.073253	0.282	0.185	0.856643
PELO	3.35295e-05	0.118459	0.561	0.427	0.873376
CRIPT	3.39469e-05	0.0779726	0.558	0.403	0.884249
TMEM254	3.39554e-05	0.054362	0.27	0.172	0.88447
MSRB1	3.40217e-05	0.0822704	0.455	0.325	0.886196
EIF4G1	3.45914e-05	0.0990557	0.63	0.495	0.901037
MICAL2	3.4961e-05	0.0684768	0.329	0.219	0.910665
NDUFA10	3.49962e-05	0.109741	0.875	0.768	0.911581
MALSU1	3.5224e-05	0.115012	0.768	0.637	0.917515
ST13	3.54007e-05	0.114615	0.947	0.912	0.922117
UBXN11	3.55408e-05	-0.165913	0.248	0.341	0.925768
THYN1	3.58559e-05	0.137616	0.834	0.764	0.933975
CHD6	3.6522e-05	0.0518882	0.345	0.229	0.951325
HIBADH	3.68959e-05	0.0965198	0.404	0.288	0.961064
UBAC2	3.74487e-05	-0.156029	0.589	0.644	0.975465
SERGEF	3.78329e-05	0.0631616	0.498	0.353	0.985471
PKM	3.79519e-05	0.145949	1	0.994	0.98857
EED	3.79841e-05	0.0874027	0.574	0.43	0.989409
PIGT	3.88278e-05	0.118801	0.715	0.575	1
PDAP1	3.88805e-05	0.132304	0.915	0.854	1
MAP3K13	3.9254e-05	0.0585852	0.276	0.176	1
TTC38	3.98859e-05	0.0535868	0.245	0.152	1
HIF1AN	4.01943e-05	0.0764671	0.389	0.267	1
ANKRD28	4.02248e-05	0.0766202	0.395	0.271	1
DHFR	4.05918e-05	0.115656	0.881	0.738	1
HSPB1	4.12616e-05	0.148833	0.815	0.692	1
STIP1	4.14306e-05	0.159208	0.85	0.738	1
FAM104A	4.16575e-05	0.125874	0.79	0.625	1
HMGCL	4.18051e-05	0.110702	0.524	0.395	1
NKG7	4.19555e-05	0.355257	0.991	0.981	1
DPH6	4.20528e-05	0.0372993	0.226	0.136	1
OMA1	4.21667e-05	0.0412703	0.248	0.153	1
MED31	4.26062e-05	0.0614353	0.408	0.278	1
TIMM8A	4.26645e-05	0.0592196	0.26	0.165	1
ACTR6	4.27913e-05	0.0801477	0.545	0.393	1
TUBA1C	4.28696e-05	0.17809	0.843	0.716	1
NAXD	4.2909e-05	0.0507952	0.254	0.162	1
HACD3	4.31672e-05	0.136205	0.665	0.534	1
PRNP	4.39016e-05	-0.163696	0.643	0.667	1
CHMP2B	4.42456e-05	0.0790121	0.558	0.409	1
MMAB	4.44825e-05	0.091805	0.445	0.327	1
SCPEP1	4.4488e-05	0.0757538	0.414	0.288	1
SPATC1L	4.45849e-05	0.0611557	0.382	0.268	1
COX5B	4.52528e-05	0.0932534	0.994	0.986	1
LRPPRC	4.54557e-05	0.0545801	0.455	0.321	1
TGFBR2	4.54581e-05	-0.118066	0.135	0.222	1
SRD5A3	4.62481e-05	0.0506772	0.201	0.121	1
SUV39H1	4.63957e-05	0.0883068	0.514	0.376	1
HPCAL1	4.656e-05	-0.16994	0.426	0.491	1
MRPS27	4.65977e-05	0.0921555	0.574	0.439	1
NUP98	4.66749e-05	0.0685449	0.498	0.363	1
ARHGEF3	4.67118e-05	-0.179988	0.323	0.397	1
NAA20	4.71255e-05	0.133886	0.74	0.628	1
METAP2	4.72759e-05	0.107842	0.799	0.634	1
NUBP1	4.79479e-05	0.0878592	0.508	0.371	1
DDX17	4.81055e-05	-0.220024	0.787	0.771	1
DZIP3	4.82362e-05	0.0472172	0.279	0.177	1
OAT	4.92391e-05	0.0801322	0.364	0.252	1
UNC119	4.92969e-05	-0.185183	0.53	0.588	1
C19orf48	4.94503e-05	0.140066	0.856	0.723	1
ATP6V1B2	4.95047e-05	0.0887379	0.558	0.421	1
SLC29A1	5.03927e-05	0.0863656	0.367	0.257	1
RAB7A	5.08717e-05	-0.156708	0.884	0.871	1
PTDSS1	5.09451e-05	-0.187869	0.856	0.85	1
PHF7	5.11142e-05	0.0729146	0.398	0.278	1
PMS2	5.13236e-05	0.0898522	0.533	0.403	1
SYT11	5.13647e-05	0.0435522	0.241	0.153	1
RPS17	5.15312e-05	0.0836913	0.464	0.336	1
XIST	5.20765e-05	-0.234812	0.226	0.314	1
UCHL3	5.21107e-05	0.102539	0.602	0.463	1
FKBP1A	5.21268e-05	-0.153397	0.969	0.952	1
AGK	5.26573e-05	0.0836238	0.567	0.415	1
LIN7C	5.27733e-05	0.0476074	0.21	0.128	1
DDX5	5.33668e-05	-0.187742	0.95	0.942	1
HMGCS1	5.34075e-05	0.103012	0.467	0.343	1
EVI2A	5.39989e-05	-0.167488	0.301	0.388	1
SH3YL1	5.40899e-05	0.0387949	0.307	0.198	1
IFI27L1	5.42642e-05	0.105156	0.777	0.628	1
UQCRQ	5.43335e-05	0.138786	0.975	0.93	1
PFN1	5.5145e-05	-0.161258	1	0.999	1
STAT3	5.56459e-05	-0.16766	0.614	0.656	1
CD58	5.592e-05	0.14043	0.743	0.64	1
MYC	5.67809e-05	0.139104	0.436	0.328	1
PITHD1	5.74996e-05	-0.173993	0.577	0.612	1
SEPHS1	5.76277e-05	0.0878764	0.423	0.304	1
NDUFA1	5.76592e-05	-0.157951	0.944	0.944	1
GTF2H3	5.81133e-05	0.0513437	0.423	0.291	1
G6PC3	5.82251e-05	0.0599806	0.448	0.314	1
TXN2	5.90261e-05	0.122519	0.928	0.857	1
CWC27	5.95767e-05	0.0725014	0.599	0.436	1
ACTR8	5.96088e-05	0.0660269	0.307	0.209	1
TRAF3IP3	6.11532e-05	-0.191425	0.906	0.929	1
RBBP4	6.12669e-05	0.116811	0.918	0.839	1
CHCHD6	6.13518e-05	0.0495602	0.251	0.16	1
COTL1	6.18002e-05	-0.387968	0.803	0.815	1
COX10	6.19864e-05	0.0613306	0.317	0.21	1
PSMB10	6.4759e-05	-0.162188	0.959	0.962	1
CYB561A3	6.47789e-05	0.0843258	0.52	0.374	1
DTD1	6.48792e-05	0.0741752	0.282	0.19	1
MED21	6.57854e-05	0.061953	0.404	0.276	1
NUDCD2	6.60866e-05	0.122747	0.881	0.762	1
CRELD2	6.839e-05	-0.10245	0.157	0.247	1
SWI5	6.86498e-05	0.0752824	0.527	0.377	1
DEK	6.96388e-05	-0.158199	0.981	0.952	1
RALY	7.00421e-05	-0.143096	0.984	0.964	1
WASL	7.06963e-05	0.0430149	0.204	0.125	1
SUN2	7.07706e-05	-0.232648	0.417	0.465	1
RBM17	7.08191e-05	-0.158801	0.843	0.834	1
MUT	7.201e-05	0.0581025	0.326	0.217	1
HPRT1	7.32693e-05	0.137704	0.925	0.849	1
DLG3	7.3569e-05	0.0497138	0.248	0.159	1
VAMP2	7.60169e-05	-0.186289	0.332	0.394	1
GNPDA1	7.64612e-05	-0.179553	0.251	0.325	1
IDH1	7.66901e-05	0.0621418	0.342	0.237	1
CALCOCO2	7.7211e-05	-0.173347	0.853	0.838	1
RCSD1	7.81112e-05	-0.196506	0.762	0.745	1
HOOK2	7.81339e-05	0.0534841	0.232	0.146	1
UFSP2	7.81513e-05	0.0798924	0.398	0.278	1
GSEC	7.8778e-05	0.0519976	0.219	0.136	1
HEXIM2	7.96514e-05	0.0468119	0.207	0.129	1
DOCK10	8.1393e-05	-0.195103	0.555	0.582	1
PGRMC2	8.14581e-05	0.0360635	0.282	0.183	1
ERAL1	8.17063e-05	0.106107	0.683	0.536	1
SON	8.17989e-05	-0.180456	0.846	0.849	1
TPRA1	8.27496e-05	0.0629691	0.395	0.277	1
TFDP1	8.27538e-05	0.0727148	0.442	0.316	1
RUNX1	8.32287e-05	0.0545091	0.251	0.163	1
PEMT	8.3641e-05	0.0793471	0.382	0.277	1
TMEM218	8.48061e-05	0.0656629	0.304	0.207	1
BANF1	8.53717e-05	0.14154	0.984	0.912	1
ACSL4	8.54593e-05	0.0551997	0.326	0.217	1
NHP2	8.56415e-05	0.130324	0.925	0.859	1
CANX	8.58743e-05	0.136765	0.871	0.789	1
CDK4	8.72912e-05	0.146371	0.862	0.747	1
RINT1	8.73156e-05	0.0428812	0.251	0.161	1
RAD54L	8.73583e-05	0.0590846	0.458	0.329	1
MT-ND2	8.77368e-05	0.0964059	0.994	0.981	1
NUDT6	8.83232e-05	0.0564422	0.27	0.177	1
LEPROT	8.86819e-05	0.0657249	0.495	0.357	1
FCMR	8.91731e-05	-0.137299	0.129	0.209	1
MT-CO2	8.93467e-05	0.120854	1	0.999	1
SEH1L	9.08001e-05	0.0448366	0.37	0.251	1
CDKN1A	9.17368e-05	0.363393	0.492	0.375	1
UROS	9.20457e-05	0.0911448	0.542	0.403	1
ING3	9.25208e-05	0.0535472	0.345	0.237	1
MRPL14	9.38783e-05	-0.159902	0.777	0.78	1
TIMM21	9.56211e-05	0.0639286	0.401	0.273	1
CCDC90B	9.57276e-05	0.120692	0.652	0.528	1
AC107871.1	9.62038e-05	0.0532836	0.21	0.129	1
CCDC25	9.70458e-05	0.0970685	0.752	0.63	1
UBE2N	9.71836e-05	0.124936	0.912	0.854	1
NNT-AS1	9.75708e-05	0.0707298	0.257	0.168	1
VAPB	9.76354e-05	0.0554964	0.398	0.271	1
NDUFAB1	9.85618e-05	0.142378	0.944	0.904	1
UBAC1	9.89924e-05	0.0611171	0.357	0.248	1
SUCLG2	9.91274e-05	0.10005	0.699	0.564	1
ATAD5	9.95279e-05	0.0640743	0.639	0.48	1
AJM1	9.98378e-05	0.0587815	0.348	0.239	1
KDELR2	0.000101133	-0.223563	0.536	0.573	1
SLC27A2	0.000101153	0.045142	0.27	0.176	1
TIMM17B	0.000101171	0.101739	0.89	0.794	1
HBEGF	0.000102433	-0.25179	0.351	0.424	1
LDLRAP1	0.000102556	-0.125021	0.129	0.206	1
NAGA	0.000103098	0.0635539	0.439	0.315	1
ZNF544	0.000104013	0.035719	0.201	0.122	1
COX7C	0.000104307	-0.10913	0.994	0.991	1
SPACA9	0.000104559	-0.138857	0.141	0.221	1
SEPT7	0.000104688	-0.154667	0.959	0.937	1
CXorf40B	0.000105313	0.0682343	0.489	0.356	1
CDC23	0.000106844	0.059465	0.386	0.265	1
TARS	0.000106943	0.0935081	0.771	0.635	1
BTF3	0.000107809	0.0759847	1	0.996	1
RRM2	0.000108056	0.0983813	0.74	0.599	1
COX6B1	0.000108659	-0.106248	0.994	0.991	1
LSM5	0.000109409	0.110782	0.95	0.897	1
POU2F2	0.000110315	-0.156092	0.185	0.268	1
SEM1	0.000110729	0.126445	0.969	0.94	1
MLST8	0.000110961	0.100148	0.58	0.448	1
UBXN1	0.000111229	-0.15146	0.984	0.97	1
ANKRD26	0.000111234	0.0517927	0.348	0.24	1
HLTF	0.000112542	0.0938711	0.533	0.406	1
METTL17	0.000113871	0.0908837	0.646	0.486	1
ECI2	0.00011393	0.112731	0.793	0.651	1
HSPB11	0.000115013	0.140558	0.9	0.815	1
SLC2A1	0.000117557	0.100141	0.646	0.506	1
TIMELESS	0.000117989	0.0528699	0.47	0.338	1
PIK3CD	0.000119647	-0.198868	0.483	0.52	1
CD40LG	0.000120538	-0.251053	0.176	0.265	1
PRUNE1	0.000120905	0.0335322	0.254	0.162	1
PGD	0.000121557	0.133512	0.853	0.742	1
VDAC2	0.000121859	0.118824	0.984	0.936	1
RPN2	0.000122084	0.105811	0.931	0.87	1
IFRD1	0.000125072	0.0693046	0.502	0.366	1
C16orf87	0.000126712	0.0775509	0.533	0.402	1
BCAT2	0.000127078	0.0764164	0.661	0.514	1
KLHL22	0.000128133	-0.135662	0.245	0.328	1
GRPEL2	0.000128314	0.0551968	0.304	0.207	1
WASHC5	0.000128619	0.0552497	0.304	0.205	1
MMP25-AS1	0.000129287	-0.20192	0.489	0.534	1
METTL22	0.000130433	0.0540504	0.285	0.192	1
POLD1	0.000130687	0.075738	0.608	0.462	1
RABGAP1L	0.000131055	0.0731635	0.473	0.345	1
BAG2	0.000131663	0.0758905	0.47	0.352	1
KLHDC2	0.000131743	-0.124754	0.147	0.225	1
ERLIN1	0.000132864	0.0294119	0.207	0.127	1
ZNF714	0.000133099	-0.117769	0.191	0.276	1
CORO1A	0.000133927	-0.138051	1	0.999	1
AP001816.1	0.0001356	0.048356	0.254	0.161	1
PPAT	0.000136115	0.0500141	0.298	0.197	1
DCP1B	0.000136334	0.0559881	0.266	0.179	1
POLD2	0.000136533	0.0887674	0.762	0.645	1
MVP	0.000137807	-0.190388	0.552	0.598	1
KRI1	0.00014075	-0.169485	0.414	0.473	1
TRMT6	0.000142347	0.0647783	0.301	0.205	1
CYB5B	0.000142975	0.0946803	0.828	0.693	1
MT1E	0.000144587	0.428875	0.618	0.504	1
LSM3	0.000144851	0.100032	0.94	0.853	1
TMEM161B-AS1	0.000145667	0.0503263	0.21	0.134	1
ERO1A	0.000147065	0.250975	0.671	0.592	1
MTCH1	0.000149294	-0.156011	0.558	0.588	1
RPS15	0.00014957	0.0614277	1	0.999	1
HMGB2	0.000150409	0.147168	0.997	0.959	1
CNOT9	0.000150938	0.0632653	0.605	0.444	1
MT-CO3	0.000151053	0.0979279	1	0.999	1
IFI6	0.000152093	0.131897	0.746	0.608	1
GUK1	0.000152973	-0.114813	0.997	0.989	1
G3BP2	0.000154384	-0.189172	0.737	0.717	1
CARHSP1	0.000157424	-0.147507	0.994	0.965	1
YIPF6	0.000158105	0.0545848	0.364	0.253	1
ACD	0.000158281	0.103131	0.768	0.617	1
SYTL3	0.00015924	0.169761	0.871	0.775	1
USP15	0.00015944	-0.191591	0.627	0.646	1
TXLNA	0.000160948	0.0743038	0.386	0.279	1
ALG8	0.000161006	0.0547723	0.467	0.333	1
TRAP1	0.000161044	0.103272	0.636	0.497	1
IL2RG	0.000161122	-0.232987	0.483	0.525	1
DPP4	0.000161224	-0.154185	0.897	0.878	1
RAB5IF	0.000161262	-0.163595	0.571	0.603	1
MRPL24	0.000162587	0.115486	0.564	0.456	1
PPIE	0.000163557	0.106589	0.755	0.629	1
KLF13	0.000163651	-0.179393	0.301	0.363	1
EBNA1BP2	0.000164248	0.114136	0.574	0.456	1
SCAMP1	0.000164455	0.0330316	0.226	0.143	1
BDH2	0.000166142	0.0291624	0.411	0.282	1
TIMM44	0.000166201	0.0544591	0.345	0.24	1
CPSF3	0.00016674	0.0730844	0.533	0.393	1
SF3A3	0.000167055	0.12098	0.734	0.614	1
LCP1	0.000167214	-0.191159	0.991	0.989	1
CAPN2	0.000169234	-0.166793	0.658	0.683	1
CAMK1	0.000169384	-0.123555	0.172	0.255	1
ELOB	0.000169468	-0.125388	0.984	0.989	1
SMDT1	0.000170418	-0.153506	0.918	0.903	1
PRICKLE3	0.000170621	0.0378857	0.232	0.146	1
ATOX1	0.000171209	0.100232	0.771	0.648	1
SMAP1	0.000171323	-0.1681	0.777	0.763	1
COQ3	0.000172086	0.047638	0.273	0.178	1
SPIDR	0.000172488	0.0445909	0.342	0.232	1
MMS19	0.000173691	0.0466865	0.489	0.345	1
CERS5	0.000174576	0.0580332	0.433	0.304	1
TLK1	0.000174682	-0.143127	0.263	0.333	1
ARHGAP15	0.000175608	-0.174725	0.815	0.797	1
RMND1	0.000175809	0.0573564	0.351	0.242	1
UTP4	0.000181134	0.0633448	0.345	0.241	1
ETFB	0.000184059	-0.165508	0.79	0.795	1
NLE1	0.000185066	0.0508367	0.26	0.173	1
SLC37A4	0.000187243	0.0673132	0.414	0.293	1
HMGN3	0.000188801	0.131946	0.912	0.851	1
TSPAN3	0.000190211	0.0381575	0.282	0.187	1
ECHS1	0.000191757	0.0987302	0.799	0.681	1
MCM7	0.000194237	0.114817	0.918	0.804	1
CARM1	0.000194803	0.0441247	0.226	0.146	1
PDE4DIP	0.000195498	0.0322493	0.298	0.198	1
ZNF519	0.00019656	0.0483429	0.216	0.138	1
BBIP1	0.000196788	0.0584036	0.567	0.42	1
TTI2	0.000198328	0.0460117	0.31	0.21	1
TFB1M	0.000198562	0.0654262	0.48	0.353	1
CD38	0.000200873	-0.187314	0.361	0.433	1
ARHGAP25	0.000203601	0.101744	0.555	0.428	1
ACO2	0.000204295	0.0965648	0.702	0.567	1
SRSF3	0.00020535	0.109116	0.984	0.946	1
PHF21A	0.000205845	0.0333546	0.223	0.142	1
RPL26L1	0.000206334	0.10933	0.708	0.585	1
MAP7D1	0.000206543	-0.142219	0.216	0.298	1
CHORDC1	0.000211334	0.0845258	0.461	0.342	1
PTGER4	0.000212255	-0.208657	0.473	0.505	1
CAPNS1	0.000212342	-0.199294	0.533	0.548	1
NCL	0.000213114	0.135942	0.972	0.959	1
PPP2R1B	0.000214255	0.0395961	0.364	0.25	1
FGD3	0.000215908	-0.182476	0.508	0.54	1
AARS	0.000217779	0.0909499	0.737	0.591	1
PIH1D1	0.000218906	0.107494	0.878	0.804	1
TM9SF2	0.000220552	0.103125	0.665	0.535	1
OARD1	0.000222064	0.0930416	0.627	0.499	1
BCLAF1	0.000226753	0.134962	0.708	0.584	1
RFC2	0.000228261	0.10686	0.777	0.657	1
ARL6IP6	0.000229189	0.109158	0.793	0.649	1
NDC1	0.000230929	0.0371217	0.37	0.256	1
RNF181	0.000231134	0.133597	0.962	0.896	1
SDF2L1	0.000232562	-0.174181	0.646	0.682	1
ANAPC11	0.000234002	0.105904	0.987	0.94	1
QSOX1	0.000234613	0.0722482	0.348	0.252	1
ELP5	0.000234661	0.0830575	0.793	0.649	1
ITGB2	0.000235237	-0.140844	0.994	0.987	1
RAD54B	0.000238775	0.0427402	0.292	0.197	1
NCALD	0.000238951	0.0706553	0.254	0.172	1
FAHD2B	0.000239778	0.0792832	0.508	0.375	1
LINC01871	0.000240784	0.0874784	0.658	0.539	1
TMEM258	0.000243138	-0.120114	0.975	0.967	1
NFKB1	0.000243254	-0.127843	0.229	0.311	1
PDE4D	0.000244705	-0.206809	0.592	0.633	1
RASSF5	0.000246513	-0.191468	0.668	0.678	1
TSPAN14	0.000246931	-0.157812	0.502	0.539	1
DDX55	0.000247547	0.0685665	0.37	0.262	1
BRMS1	0.000247639	-0.164302	0.517	0.559	1
TSEN15	0.000249666	0.116745	0.821	0.703	1
SLC9A9	0.000251344	0.0373709	0.288	0.193	1
ORC6	0.000251782	0.0924323	0.699	0.545	1
HDAC3	0.000252012	0.102372	0.687	0.548	1
CDKN2AIP	0.00025217	0.0557139	0.58	0.444	1
KIFAP3	0.000252483	0.0551427	0.42	0.297	1
APAF1	0.000252945	0.0503901	0.317	0.222	1
ATM	0.000253103	-0.187879	0.439	0.483	1
PITPNB	0.000253462	0.0619914	0.533	0.399	1
APRT	0.000253928	0.0822312	0.969	0.925	1
EIF4A3	0.000255889	-0.213982	0.63	0.612	1
HNRNPD	0.000256194	0.111295	0.903	0.82	1
RNFT1	0.000256392	0.0389554	0.307	0.206	1
GPN3	0.000257764	0.101222	0.621	0.497	1
BSCL2	0.000258978	0.0555179	0.392	0.278	1
PLCD1	0.000259122	0.0303667	0.361	0.246	1
SORL1	0.000259834	-0.181774	0.257	0.322	1
KIAA1586	0.000260287	0.0534595	0.31	0.217	1
PSME1	0.000262704	-0.135856	0.997	0.99	1
ENO2	0.000263024	0.121727	0.834	0.681	1
P4HA2	0.000263979	0.078647	0.323	0.227	1
ABCE1	0.000264915	0.10662	0.467	0.354	1
SRSF5	0.000265676	-0.144136	0.953	0.917	1
GADD45GIP1	0.000268631	0.12049	0.856	0.787	1
RPUSD3	0.000269895	0.103856	0.721	0.604	1
SUMO1	0.000270672	0.101544	0.931	0.896	1
SFXN4	0.000271349	0.0756475	0.42	0.309	1
GOT1	0.000273456	0.082345	0.589	0.464	1
PRPF4	0.000273674	0.0586025	0.483	0.353	1
HSF1	0.000273882	-0.153659	0.342	0.406	1
AC006064.4	0.000274059	0.0843065	0.216	0.142	1
MAN2A1	0.000278697	0.0300684	0.26	0.171	1
IDH3A	0.000282117	0.087012	0.511	0.388	1
KIAA1551	0.000283015	-0.15466	0.58	0.602	1
EPS8L2	0.000284693	0.074475	0.395	0.29	1
CCPG1	0.000285187	0.0691686	0.398	0.292	1
RPL35A	0.00028714	0.0892083	1	0.997	1
LRRC61	0.000288461	0.0529796	0.329	0.227	1
TATDN3	0.000291619	0.0681537	0.42	0.306	1
NUDCD1	0.000292126	0.0648586	0.439	0.323	1
IKBKE	0.00029234	-0.156441	0.339	0.395	1
ANP32B	0.00029333	-0.116331	0.997	0.993	1
CCDC43	0.000294086	0.067456	0.451	0.333	1
DUSP4	0.000295978	0.0926407	0.668	0.504	1
RAB11FIP1	0.000301512	-0.175351	0.68	0.696	1
TMA7	0.000302872	-0.111004	0.997	0.991	1
INTS13	0.000304043	0.0816445	0.517	0.387	1
SCRN3	0.000304645	0.0463593	0.21	0.135	1
GMPPA	0.000308209	0.0506789	0.436	0.316	1
RAB24	0.000310032	-0.152424	0.803	0.8	1
AGL	0.000313148	0.051027	0.266	0.179	1
TMEM141	0.000313614	-0.171025	0.567	0.596	1
C6orf89	0.000316114	0.0948966	0.621	0.483	1
LAP3	0.000316706	0.0933695	0.727	0.598	1
SH3BP1	0.000317128	-0.170012	0.724	0.732	1
ZFAND2B	0.000320311	-0.147861	0.53	0.564	1
GTPBP3	0.000320886	0.0467369	0.332	0.228	1
PGAP1	0.00032222	0.0555909	0.263	0.18	1
CORO1C	0.000322261	0.0446564	0.348	0.243	1
HIBCH	0.000327844	0.0499269	0.329	0.228	1
SDHA	0.000330608	0.105704	0.906	0.828	1
AP1S2	0.000330734	-0.149448	0.292	0.359	1
PSMB5	0.00033142	0.105979	0.809	0.687	1
ANXA2R	0.000335107	-0.157479	0.505	0.558	1
STUB1	0.000337581	-0.139953	0.172	0.245	1
MCM4	0.000338766	0.0866446	0.63	0.503	1
DOCK8	0.000338857	-0.188349	0.821	0.797	1
APEX2	0.000339694	0.0644722	0.505	0.375	1
SUFU	0.000343753	0.0376948	0.238	0.156	1
FAM50B	0.00034571	0.0505479	0.266	0.18	1
AAK1	0.00034642	-0.161967	0.354	0.415	1
RINL	0.000346597	0.0465628	0.433	0.311	1
TM9SF4	0.000352991	0.0619063	0.373	0.264	1
ZNF460	0.000354402	0.0218463	0.21	0.133	1
CNPPD1	0.000357848	-0.145282	0.661	0.681	1
FUZ	0.000358626	0.0401978	0.26	0.173	1
CISD1	0.000360033	0.0872158	0.724	0.578	1
RPS13	0.000364517	0.0812106	1	0.998	1
DPM1	0.000370418	0.0674309	0.517	0.396	1
PUDP	0.000372059	0.0573838	0.357	0.25	1
RPL37A	0.000377514	0.0970025	1	0.995	1
TMEM60	0.000378228	0.0670618	0.502	0.377	1
SCO1	0.000378519	0.0648932	0.37	0.268	1
RBFA	0.000381719	0.0851758	0.373	0.276	1
ATXN7L1	0.000382739	0.0450158	0.26	0.174	1
CHD1L	0.000384978	0.0924851	0.571	0.443	1
DRG1	0.00038546	0.121042	0.708	0.605	1
PTMS	0.000385651	0.0445751	0.21	0.133	1
FAM114A2	0.000386311	0.0376742	0.298	0.205	1
MRPS15	0.000395998	0.113729	0.956	0.929	1
FGFR1	0.000399531	-0.12271	0.135	0.207	1
HSD17B10	0.000403458	0.113605	0.831	0.735	1
EXOSC2	0.000404474	0.0459086	0.348	0.244	1
RPL27A	0.000414237	-0.157037	0.994	0.988	1
PIP4P2	0.000414592	0.0316733	0.26	0.173	1
EPB41	0.000416519	-0.197567	0.511	0.534	1
SLC25A19	0.000419709	0.0471134	0.279	0.19	1
GINS3	0.00042472	0.0445672	0.238	0.157	1
ICAM1	0.000426592	0.0492119	0.279	0.194	1
BMS1	0.000426869	0.0568408	0.398	0.29	1
UBE2T	0.000428896	0.112923	0.906	0.778	1
FKBP3	0.00043083	0.119734	0.803	0.676	1
CEP152	0.000432596	0.0708209	0.476	0.363	1
CARD19	0.000433305	-0.166608	0.627	0.645	1
ANXA6	0.000445336	-0.161407	0.978	0.97	1
NDUFS6	0.000449602	-0.131452	0.89	0.887	1
TFRC	0.000451962	0.0728838	0.342	0.245	1
ENY2	0.000453413	0.0959997	0.918	0.853	1
KCTD18	0.000453732	0.0354457	0.245	0.162	1
STT3A	0.000458158	0.0846296	0.555	0.44	1
ANKZF1	0.000460009	0.0557013	0.608	0.463	1
ZNF331	0.000463656	0.0220716	0.251	0.162	1
TP53	0.000464519	0.0353297	0.37	0.258	1
TSN	0.000469886	0.0551291	0.558	0.414	1
LRRFIP2	0.000474192	0.0768547	0.665	0.529	1
TMEM69	0.000477243	0.0444906	0.379	0.266	1
IL27RA	0.000481086	-0.167459	0.408	0.463	1
CMTM7	0.000482325	-0.146284	0.31	0.371	1
PTCD3	0.000483853	0.0402688	0.408	0.294	1
COA1	0.000483939	0.114964	0.693	0.571	1
INTS7	0.000484254	0.0448759	0.248	0.165	1
MRPS22	0.000485558	0.0655993	0.561	0.431	1
KANSL1-AS1	0.000486938	-0.118061	0.163	0.236	1
CAAP1	0.000489917	0.056842	0.386	0.28	1
PDIA3	0.00049239	-0.153487	0.953	0.925	1
CDCA5	0.000492748	0.120753	0.755	0.647	1
GLMN	0.000497568	0.0360323	0.323	0.223	1
AL133415.1	0.000500651	0.172044	0.417	0.318	1
DHRS4	0.00051063	0.074212	0.599	0.461	1
HSP90B1	0.000510848	0.126266	0.959	0.913	1
DLGAP4	0.000515069	-0.133058	0.232	0.303	1
GMPS	0.000516583	0.0981895	0.862	0.766	1
OXSM	0.000516824	0.0591988	0.257	0.175	1
TAP1	0.000516857	-0.208432	0.95	0.92	1
UFL1	0.000519068	0.0954444	0.614	0.495	1
SP140L	0.000520935	-0.164219	0.561	0.579	1
HSBP1	0.000522623	0.103409	0.881	0.79	1
SLC25A37	0.00052317	0.0418692	0.213	0.14	1
IQGAP1	0.000523844	-0.171131	0.834	0.848	1
COX8A	0.000524722	-0.0887436	1	0.995	1
WDR43	0.000535056	0.0596601	0.351	0.257	1
C1orf43	0.000536442	0.119812	0.862	0.812	1
INTS14	0.00053783	0.0576549	0.411	0.298	1
GGT1	0.000538937	0.0667353	0.295	0.207	1
PNPT1	0.000541446	0.0241182	0.216	0.139	1
SLC25A32	0.000543075	0.0820694	0.351	0.256	1
SELENOT	0.000547328	0.108783	0.868	0.772	1
EIF3D	0.000549109	0.0990633	0.944	0.925	1
PRMT5	0.000550532	0.0485914	0.329	0.232	1
REC8	0.000550812	0.0352569	0.295	0.201	1
UBE2V2	0.000551221	0.100857	0.85	0.744	1
POLA1	0.000557779	0.029435	0.245	0.16	1
RPL17	0.000562395	0.118805	0.956	0.885	1
CASP2	0.000568291	0.0511646	0.389	0.282	1
NEDD8	0.000569033	-0.134191	0.871	0.865	1
HACL1	0.000569081	0.0671484	0.414	0.302	1
ATP5MC1	0.000576735	0.120976	0.878	0.762	1
PRKDC	0.00057731	0.0840803	0.793	0.673	1
APMAP	0.000577563	0.10838	0.718	0.601	1
RAPGEF1	0.000578819	0.030694	0.241	0.159	1
NDUFS3	0.000579988	0.0968323	0.906	0.815	1
STX18	0.000581411	0.0474212	0.357	0.259	1
RAD9A	0.000582342	0.0501668	0.417	0.3	1
NR2C2AP	0.000583322	0.0487975	0.335	0.237	1
OSGEP	0.000584097	-0.152722	0.489	0.522	1
DCAF13	0.000586183	0.0788197	0.517	0.396	1
PSMA3	0.000586954	0.107024	0.918	0.827	1
SCAND1	0.000592401	-0.147033	0.922	0.9	1
FIS1	0.000592422	-0.135681	0.815	0.829	1
AKR7A2	0.000596976	-0.168844	0.32	0.382	1
ANXA2	0.000598414	-0.131915	0.969	0.962	1
ANAPC13	0.00060184	0.056282	0.47	0.352	1
AK4	0.000602506	0.0755254	0.48	0.363	1
NSDHL	0.000603761	0.0554368	0.298	0.206	1
NDUFA2	0.000606891	-0.119577	0.944	0.931	1
MBD2	0.000610468	0.0516653	0.345	0.244	1
MRPS24	0.000610544	0.0607779	0.455	0.337	1
UQCRC2	0.000611656	0.126287	0.909	0.862	1
CYP2R1	0.000612717	0.046859	0.451	0.328	1
PSMF1	0.000613485	0.100511	0.903	0.791	1
KRBOX4	0.000616587	0.0450121	0.307	0.21	1
MRPL46	0.000618211	0.0891357	0.505	0.381	1
AP3M2	0.000619843	0.0502649	0.429	0.315	1
PDCL3	0.000628166	0.0645279	0.639	0.491	1
P4HB	0.000633152	0.13632	0.984	0.966	1
ZNF574	0.0006368	0.0493198	0.223	0.151	1
CSTF3	0.000637106	0.0355946	0.213	0.139	1
NBPF14	0.000638766	-0.151282	0.298	0.355	1
PSMA1	0.000640293	-0.150225	0.768	0.751	1
NBEAL1	0.000646785	0.0753214	0.398	0.298	1
NEIL3	0.000654205	0.0776134	0.577	0.453	1
BATF	0.000654474	0.117268	0.781	0.647	1
ANKRD17	0.000654582	0.0467581	0.354	0.252	1
TSEN34	0.000654654	0.069218	0.542	0.417	1
TBC1D1	0.000657498	-0.145807	0.282	0.343	1
RAB8A	0.000658047	0.100254	0.887	0.778	1
DHRS13	0.000658763	-0.109052	0.144	0.211	1
SMPD1	0.000659725	-0.153116	0.348	0.396	1
PARP4	0.000661966	0.0466579	0.379	0.271	1
JUNB	0.000669225	-0.225865	0.925	0.918	1
UBQLN2	0.000675093	-0.149606	0.313	0.373	1
FANCA	0.00067584	0.0236848	0.379	0.269	1
ERGIC2	0.000685841	0.0916273	0.633	0.5	1
ZGPAT	0.000686529	-0.14227	0.408	0.446	1
SEC61G	0.000686869	0.109801	0.962	0.932	1
TMEM101	0.000687681	0.0775256	0.605	0.489	1
MRTO4	0.000690074	0.066371	0.373	0.268	1
PKMYT1	0.000693284	0.0781772	0.809	0.674	1
TAGAP	0.000702568	-0.174322	0.398	0.453	1
GLG1	0.000707081	-0.193821	0.687	0.71	1
MCTP2	0.000715122	0.0722433	0.389	0.289	1
SYNJ2	0.00071595	-0.109311	0.216	0.287	1
UBE2J2	0.000725656	-0.149184	0.48	0.499	1
CDC5L	0.000726803	0.0917398	0.693	0.58	1
MKL1	0.0007282	-0.114361	0.194	0.262	1
WBP2	0.000731321	0.0964901	0.809	0.698	1
NOP53	0.000733741	-0.156902	0.966	0.95	1
RNF149	0.000735638	-0.171309	0.818	0.799	1
RPS20	0.000736014	-0.160998	0.959	0.947	1
ANXA1	0.000736357	0.207417	0.875	0.818	1
CLPTM1	0.00073655	0.0483775	0.605	0.452	1
TOMM20	0.000755094	0.101571	0.959	0.927	1
CASP7	0.000755515	0.0588654	0.364	0.266	1
PIGL	0.000764069	0.0359298	0.292	0.201	1
SMIM15	0.00076424	0.0772442	0.577	0.459	1
FECH	0.000770229	0.0467521	0.219	0.146	1
ALDH18A1	0.000776747	0.0761625	0.445	0.337	1
TNFSF14	0.000782233	-0.110541	0.147	0.22	1
PSMC2	0.000783634	0.101734	0.799	0.679	1
KIF20B	0.000786296	0.060998	0.781	0.646	1
BABAM2	0.000787206	0.0421427	0.354	0.256	1
FBXO8	0.000787669	0.0296062	0.216	0.142	1
SLC39A4	0.000789154	0.0430115	0.348	0.246	1
RPL7L1	0.000797924	0.0638993	0.69	0.547	1
LRSAM1	0.000805135	0.035955	0.204	0.134	1
ATP5F1C	0.000809444	0.0943557	0.997	0.964	1
RAVER1	0.000812137	0.040442	0.439	0.317	1
LIAS	0.000815649	0.0254051	0.292	0.198	1
LSG1	0.000822399	0.0394715	0.332	0.234	1
USP28	0.000823708	0.0536367	0.317	0.225	1
PUM3	0.000828517	0.0500282	0.439	0.321	1
P2RY8	0.000829618	0.0771171	0.605	0.47	1
MKRN2	0.000829755	0.0302668	0.345	0.238	1
GK	0.000834813	0.0622484	0.31	0.225	1
CCDC12	0.00084031	-0.137123	0.74	0.715	1
LSM6	0.000842649	0.0886578	0.871	0.77	1
FRG1	0.000842987	0.100224	0.799	0.667	1
NFIC	0.000856116	0.0319745	0.266	0.179	1
DCLRE1B	0.000858512	0.033687	0.307	0.212	1
ATXN3	0.000859464	0.0445221	0.357	0.256	1
KLHL6	0.000864267	-0.105913	0.135	0.2	1
PLEC	0.000870227	-0.199771	0.238	0.299	1
BUD23	0.000870676	0.0987477	0.69	0.598	1
ODR4	0.000874488	0.0428885	0.219	0.147	1
NDUFAF1	0.000882405	0.0405644	0.307	0.215	1
PYM1	0.000885732	0.0538574	0.608	0.469	1
TRUB2	0.000885817	0.04207	0.348	0.249	1
HAUS1	0.000886682	0.0810025	0.812	0.698	1
SRSF7	0.000892854	0.126219	0.975	0.939	1
MINPP1	0.000895014	0.0245686	0.235	0.155	1
GNGT2	0.000904191	0.0322378	0.332	0.231	1
PHTF1	0.000904392	0.050287	0.361	0.26	1
PRKCH	0.000911774	-0.17304	0.737	0.73	1
OTUB1	0.000916484	-0.128472	0.9	0.877	1
DCTPP1	0.000924447	0.0923283	0.674	0.565	1
KYAT3	0.000930458	0.0893569	0.545	0.424	1
IVNS1ABP	0.000932215	-0.182217	0.624	0.631	1
BRAT1	0.000933522	0.057055	0.458	0.342	1
MARF1	0.000938268	0.0199911	0.219	0.144	1
PRMT3	0.000938425	0.00810409	0.26	0.171	1
MDP1	0.000941071	0.0324948	0.21	0.139	1
MED6	0.00095172	0.0212451	0.21	0.138	1
SENP7	0.000953761	-0.1065	0.194	0.261	1
FN3KRP	0.000964383	0.0741473	0.524	0.412	1
STX11	0.000982289	0.0340735	0.37	0.266	1
STX3	0.000984221	-0.113827	0.135	0.2	1
OS9	0.000987444	0.0800296	0.746	0.606	1
MIER1	0.000989046	-0.170088	0.53	0.55	1
SOS1	0.000999275	-0.164019	0.263	0.314	1
FASTKD1	0.00100126	0.0264619	0.257	0.174	1
MRPL47	0.0010026	0.0839047	0.749	0.637	1
PTPN7	0.0010029	-0.158041	0.818	0.804	1
RAD51D	0.0010043	0.0467539	0.273	0.191	1
TUBGCP4	0.00100558	0.0453454	0.304	0.217	1
YWHAB	0.00100569	0.101719	0.987	0.979	1
BAG1	0.00100909	-0.107259	0.204	0.278	1
PEX3	0.00100934	0.0409921	0.288	0.202	1
PPIB	0.00101081	0.0969023	0.987	0.988	1
FH	0.00101561	0.0969037	0.743	0.633	1
PLCG1	0.0010161	-0.164279	0.251	0.308	1
NSMAF	0.00101652	0.0355565	0.273	0.189	1
CDCA4	0.00101755	0.0891441	0.743	0.605	1
PEX2	0.00102119	0.0602782	0.639	0.502	1
LAGE3	0.00102206	-0.177894	0.762	0.726	1
UROD	0.00103694	0.0788009	0.724	0.59	1
SNHG15	0.00104377	0.0847126	0.796	0.653	1
RFX5	0.0010455	0.0665801	0.445	0.332	1
HSPA1B	0.00105375	0.04993	0.232	0.161	1
PSMD14	0.00106344	0.109688	0.824	0.735	1
TIMM50	0.00106652	0.0875178	0.608	0.496	1
TXNRD2	0.00107777	0.0314653	0.263	0.181	1
FAM122A	0.00108111	0.033475	0.295	0.205	1
ITGA4	0.00108916	0.143445	0.708	0.594	1
NOL10	0.00109273	0.0126385	0.301	0.203	1
GRPEL1	0.00109749	0.112791	0.646	0.543	1
LINC02273	0.0011016	-0.122376	0.241	0.309	1
PTPN2	0.00110171	0.0682807	0.818	0.689	1
MOB1A	0.00110787	0.0874913	0.89	0.798	1
LAS1L	0.00111002	0.0510572	0.48	0.359	1
SRRT	0.0011112	0.104165	0.592	0.481	1
SNAPC1	0.00113106	0.0348535	0.426	0.317	1
DERA	0.00113487	0.0538657	0.574	0.432	1
INTS9	0.00114846	0.0362684	0.213	0.143	1
NFATC3	0.00115288	-0.16979	0.508	0.542	1
NOC3L	0.00115652	0.0440197	0.263	0.185	1
SMIM26	0.00115921	-0.123172	0.865	0.833	1
MED29	0.00117185	-0.117658	0.357	0.41	1
PTPN4	0.00117978	-0.151443	0.379	0.423	1
MESD	0.00118319	0.0769184	0.809	0.705	1
EBAG9	0.00118416	0.0331141	0.389	0.276	1
ZNRD1	0.00118615	0.0851156	0.909	0.866	1
PIGF	0.00119232	0.0601841	0.517	0.392	1
WASF2	0.00120001	-0.146332	0.862	0.828	1
DNAJB1	0.00120616	-0.149926	0.699	0.685	1
PSMD3	0.00121042	0.109268	0.784	0.684	1
ELMOD2	0.00121375	0.036233	0.226	0.154	1
LNPEP	0.00121852	-0.18104	0.423	0.466	1
CSTF2	0.00123065	0.0662326	0.436	0.334	1
ATF3	0.00123686	0.0267911	0.351	0.255	1
PSMB1	0.0012373	0.0929903	0.987	0.973	1
MAP4K4	0.00124799	-0.133549	0.219	0.28	1
GPAT4	0.0012536	0.0348053	0.298	0.209	1
CCNA2	0.00126299	0.101723	0.796	0.679	1
RNF141	0.00126454	0.0405852	0.304	0.212	1
CEP295	0.00126713	0.0462504	0.392	0.292	1
STK39	0.00127953	0.0441159	0.226	0.152	1
DPY30	0.00129246	0.0842195	0.793	0.676	1
TAPBP	0.00129749	-0.11391	0.865	0.84	1
PITPNC1	0.00130929	-0.127274	0.26	0.322	1
WBP11	0.0013117	0.0995332	0.746	0.626	1
SLC39A1	0.00131206	0.053905	0.586	0.449	1
TMEM185A	0.00131445	0.0282044	0.235	0.158	1
GGCT	0.00131566	0.100409	0.871	0.766	1
MAPK6	0.00131884	0.0336723	0.313	0.218	1
GATB	0.00132044	0.0343796	0.223	0.149	1
KRTCAP2	0.00132064	-0.11424	0.928	0.921	1
TBC1D25	0.001321	0.0268554	0.26	0.179	1
BCKDK	0.00132149	0.0816991	0.677	0.572	1
CSE1L	0.00132339	0.107509	0.502	0.395	1
DDX27	0.00132814	0.0512922	0.58	0.445	1
RPL18	0.00133156	0.0588103	1	0.999	1
NQO1	0.00133195	0.0644709	0.445	0.34	1
TAF9B	0.00133422	0.0614827	0.292	0.208	1
RIDA	0.00133759	0.0381129	0.348	0.253	1
YBX1	0.0013404	0.173372	0.987	0.97	1
CMAS	0.0013449	0.0694243	0.596	0.475	1
DHX40	0.0013456	0.0434568	0.216	0.146	1
GSDMD	0.0013479	-0.176492	0.718	0.706	1
RTN3	0.00134926	0.10049	0.871	0.741	1
GLO1	0.00135148	0.103845	0.878	0.823	1
KEAP1	0.00135254	0.0805071	0.781	0.63	1
COX6A1	0.00135326	0.0837255	0.991	0.985	1
NASP	0.00135585	0.102263	0.944	0.908	1
ARFGAP1	0.00137522	0.0244953	0.232	0.156	1
COX16	0.0013757	0.104542	0.737	0.62	1
SKAP1	0.00138221	-0.14546	0.89	0.887	1
PDHA1	0.00139212	0.102481	0.652	0.561	1
ARHGAP30	0.00139836	-0.183605	0.749	0.75	1
GBP2	0.00139922	-0.150239	0.884	0.876	1
APOO	0.00140124	0.0665617	0.455	0.347	1
DCXR	0.00140367	-0.153419	0.912	0.887	1
EGR1	0.00140882	-0.146196	0.16	0.227	1
EIF2A	0.00141251	0.0827326	0.831	0.7	1
MTMR2	0.00142846	0.0222194	0.251	0.171	1
CPSF6	0.00143412	0.0930176	0.649	0.559	1
ITGB3BP	0.00143605	0.0958676	0.712	0.602	1
OSER1	0.00143954	0.0562094	0.458	0.355	1
RBM12	0.00144939	0.0170971	0.229	0.153	1
THEMIS2	0.00146107	-0.133443	0.292	0.349	1
NFKBIZ	0.00146294	-0.15657	0.223	0.283	1
TYW1	0.00147189	0.022353	0.248	0.167	1
GART	0.00147564	0.0592501	0.533	0.411	1
COPS8	0.00148411	0.0764055	0.708	0.569	1
FRMD4B	0.00148666	0.0318249	0.498	0.384	1
SMC4	0.00149286	0.092619	0.918	0.819	1
TBL3	0.00149984	0.0686257	0.417	0.304	1
HADHB	0.00150083	0.079989	0.765	0.65	1
PRPF19	0.00150558	0.0826936	0.724	0.591	1
ABI1	0.00150783	0.0668017	0.624	0.491	1
TMEM106B	0.00150859	-0.14745	0.408	0.438	1
UPP1	0.00151481	0.0910629	0.734	0.621	1
GSTM3	0.00152241	0.0526772	0.213	0.147	1
MTIF2	0.00152613	0.0481424	0.332	0.245	1
ISY1	0.00153227	0.0414809	0.263	0.186	1
MPRIP	0.00153812	-0.158731	0.408	0.447	1
COQ8A	0.00154792	0.0284138	0.251	0.171	1
TMEM43	0.00155155	0.0225257	0.32	0.224	1
MRPS18A	0.00155827	0.0661917	0.68	0.554	1
KHDC4	0.00155899	0.0337102	0.288	0.204	1
ACSS2	0.00155925	0.038963	0.229	0.16	1
PCSK7	0.00157403	-0.140628	0.373	0.427	1
CENPW	0.00158177	0.0989339	0.846	0.724	1
HRH2	0.00159495	-0.10353	0.147	0.212	1
ANP32E	0.0015964	0.0576833	0.956	0.857	1
PSMB7	0.0016012	0.0832811	0.821	0.737	1
CARD11	0.00160696	-0.142348	0.254	0.315	1
KCTD13	0.00161358	0.0280172	0.329	0.232	1
YPEL3	0.0016373	-0.146137	0.204	0.268	1
ZNF146	0.00164967	0.0467638	0.455	0.337	1
BCKDHB	0.0016547	0.0359582	0.292	0.203	1
PMVK	0.00166539	0.075406	0.762	0.632	1
RRM2B	0.00166633	0.0328315	0.288	0.204	1
SDHB	0.00166875	0.101086	0.85	0.748	1
PSMA4	0.00166978	0.0922714	0.931	0.876	1
JPT1	0.00169229	0.138126	0.981	0.948	1
KIAA1109	0.00170499	0.00780745	0.288	0.197	1
CLINT1	0.00171755	-0.133634	0.489	0.529	1
PABPC4	0.0017311	0.0293673	0.37	0.271	1
VEZT	0.00173305	0.0590773	0.317	0.232	1
TOMM5	0.00173625	0.112352	0.865	0.76	1
RNF114	0.00173768	0.0840984	0.771	0.669	1
SEC61A1	0.00173824	0.0356136	0.639	0.504	1
SCOC	0.00174828	0.0631527	0.583	0.452	1
COG6	0.00175063	0.0434751	0.216	0.145	1
C6orf136	0.00175064	0.0488556	0.511	0.389	1
CGAS	0.00175493	0.0399583	0.442	0.332	1
ARL1	0.00175559	0.0709272	0.549	0.433	1
UBE2R2	0.00175732	0.0295182	0.329	0.236	1
MRPS10	0.00178306	0.0730268	0.661	0.542	1
UHRF1	0.00178362	0.0769787	0.611	0.484	1
C16orf54	0.00178676	-0.131157	0.245	0.307	1
WDR48	0.0017993	0.0311096	0.248	0.169	1
NDUFB4	0.0018053	0.108498	0.984	0.953	1
SNAP29	0.00181189	0.0533409	0.658	0.527	1
APEX1	0.00183246	0.0688008	0.84	0.73	1
VBP1	0.00185631	0.0911881	0.834	0.72	1
BRCA2	0.00187982	0.0413314	0.451	0.341	1
MRPL36	0.00190639	-0.134344	0.727	0.738	1
FDX1	0.0019086	-0.143396	0.382	0.427	1
HEBP1	0.00192069	-0.107658	0.254	0.314	1
PIR	0.00192353	0.0507395	0.288	0.206	1
EIF3I	0.00193864	0.0853256	0.959	0.936	1
ACOT8	0.00194094	0.0959145	0.683	0.573	1
PFKP	0.00194524	0.0742425	0.846	0.737	1
RCN1	0.0019566	0.0390384	0.295	0.212	1
TMEM143	0.00196327	0.0490675	0.288	0.206	1
IARS	0.0019634	0.0919315	0.627	0.5	1
POLR2E	0.00196462	0.0865146	0.975	0.936	1
AKNA	0.00197268	-0.179858	0.646	0.623	1
IFT52	0.00198711	0.0639903	0.351	0.261	1
ADAM15	0.0019899	-0.142725	0.379	0.418	1
FGFR1OP	0.00199648	0.0204105	0.382	0.274	1
RHOA	0.0020011	0.0729764	1	0.991	1
PPP2R5C	0.00200329	-0.157219	0.643	0.65	1
COPS3	0.00201369	0.0865207	0.862	0.785	1
YIF1A	0.00201696	0.070591	0.712	0.585	1
CRNKL1	0.00203341	0.030302	0.367	0.266	1
AC243960.1	0.00203435	-0.143474	0.379	0.417	1
ZNF22	0.00203464	-0.158475	0.658	0.651	1
HMMR	0.00203852	0.0814401	0.63	0.516	1
HMGA1	0.00204334	-0.18211	0.897	0.89	1
TIMMDC1	0.00204457	0.0834746	0.614	0.503	1
BCL2L1	0.00205158	-0.133288	0.364	0.423	1
VRK3	0.00205746	0.0605703	0.564	0.433	1
GPRIN3	0.00206034	0.0261262	0.602	0.474	1
TMEM120A	0.00206748	0.0451927	0.451	0.342	1
GCHFR	0.00206808	-0.120214	0.809	0.801	1
RFC3	0.00206829	0.0351728	0.445	0.329	1
SLC39A9	0.00207098	0.0173831	0.219	0.149	1
CEP72	0.00208848	0.0362011	0.216	0.148	1
HUWE1	0.00209352	0.0544553	0.649	0.525	1
ACADSB	0.00209502	0.0311958	0.201	0.134	1
PRKD2	0.00209725	-0.131172	0.307	0.365	1
TRAF5	0.00210074	-0.139378	0.332	0.38	1
BRD3	0.00210335	-0.122017	0.292	0.351	1
PSMA6	0.00210684	0.0866003	0.947	0.871	1
RHOC	0.00213701	0.0366151	0.31	0.225	1
SLC4A1AP	0.00214122	0.0525109	0.592	0.464	1
RABGGTB	0.00214442	0.0429583	0.464	0.349	1
C20orf204	0.00214716	-0.196567	0.339	0.392	1
MYO1F	0.00215562	-0.147735	0.636	0.639	1
GPR174	0.00215708	0.0400101	0.295	0.213	1
AK6	0.00216036	0.0999545	0.605	0.498	1
TXNL1	0.00216959	0.0916672	0.881	0.817	1
PAPOLA	0.00218018	0.098289	0.878	0.807	1
PAG1	0.00218276	-0.180959	0.458	0.476	1
UBE2V1	0.00219014	0.0379863	0.348	0.253	1
GNB2	0.00219571	-0.200589	0.652	0.631	1
MYO19	0.00219594	0.0621834	0.339	0.252	1
FEN1	0.00221804	0.0959843	0.815	0.693	1
IL4R	0.00221845	-0.149124	0.502	0.536	1
YWHAQ	0.00223137	0.0881365	0.981	0.935	1
MRPL50	0.00223938	0.0593894	0.448	0.346	1
GLE1	0.00224057	0.0673573	0.442	0.347	1
GIMAP5	0.00224601	0.0492791	0.251	0.179	1
SMIM30	0.00228664	0.0490714	0.386	0.288	1
RMC1	0.00228706	-0.0952564	0.241	0.301	1
PSMD12	0.002297	0.075351	0.655	0.532	1
EIF2S1	0.0023075	0.105194	0.646	0.55	1
COPZ1	0.00231254	-0.122705	0.79	0.799	1
MAP2K3	0.00231975	-0.113032	0.279	0.343	1
SLBP	0.00233371	-0.191992	0.364	0.405	1
DNA2	0.00233421	0.0254632	0.298	0.211	1
ALAS1	0.00233571	0.0685963	0.658	0.523	1
DVL2	0.00234627	0.0264068	0.317	0.225	1
MAN1B1	0.00236521	0.0231427	0.476	0.356	1
ING1	0.00239869	0.0503505	0.298	0.219	1
SLC16A1	0.0024204	0.0404906	0.411	0.306	1
GNL3	0.00242667	0.0452612	0.433	0.327	1
GEMIN4	0.00242868	0.0195743	0.273	0.188	1
GZMM	0.0024305	0.0789915	0.696	0.582	1
AUP1	0.00246183	0.077719	0.9	0.806	1
PABPC1	0.00246193	0.0720524	0.997	0.993	1
METAP1	0.00247242	0.0647272	0.558	0.435	1
C12orf43	0.00250242	0.0359317	0.348	0.255	1
CYTOR	0.00250765	0.136035	0.762	0.671	1
EIF2D	0.00251104	0.0653979	0.502	0.394	1
PPIH	0.00251899	0.0975676	0.887	0.794	1
GOLT1B	0.00252412	0.0744578	0.633	0.521	1
PIGU	0.0025258	0.0401248	0.295	0.213	1
TNFAIP8L2	0.00252662	-0.124976	0.223	0.282	1
NKAP	0.00253663	0.0758702	0.699	0.601	1
TDRD3	0.00253727	0.0206008	0.207	0.139	1
FBXO25	0.00256481	0.031271	0.229	0.159	1
GTPBP4	0.00258492	0.0467985	0.539	0.427	1
SSRP1	0.00259543	0.0800734	0.918	0.834	1
RSL1D1	0.00259627	0.0821253	0.862	0.777	1
MRPL40	0.00259793	0.0945442	0.734	0.608	1
PRADC1	0.00259888	0.0357451	0.505	0.381	1
HNRNPUL1	0.00264618	0.0922471	0.89	0.823	1
ZNF138	0.00264748	0.052003	0.354	0.261	1
CLTB	0.00265621	-0.152501	0.201	0.256	1
TBCA	0.00267353	0.0834837	0.978	0.942	1
SKA1	0.00268355	0.0439909	0.448	0.338	1
MIR181A1HG	0.00268389	-0.127847	0.285	0.345	1
IAH1	0.00269313	0.0855662	0.931	0.828	1
LANCL1	0.00270142	0.0441857	0.31	0.223	1
TRIM26	0.00270809	0.0315402	0.37	0.272	1
NCOA7	0.00272485	0.0191058	0.354	0.255	1
ARHGEF39	0.00273569	0.0399575	0.376	0.282	1
TAZ	0.00273851	-0.137914	0.555	0.577	1
KPNB1	0.00275738	0.098751	0.909	0.816	1
BCL7B	0.00276098	-0.119763	0.285	0.335	1
NOL8	0.00277063	0.047234	0.433	0.326	1
METTL5	0.00278882	0.0724212	0.818	0.724	1
CYB5R4	0.00279763	0.0343297	0.401	0.291	1
WDR46	0.00280018	0.0404619	0.411	0.304	1
TRIB3	0.00282947	-0.030504	0.476	0.352	1
GOLPH3	0.00283406	-0.123099	0.389	0.431	1
TOMM22	0.00283714	0.102282	0.881	0.819	1
ADA2	0.00283715	-0.139981	0.285	0.334	1
VIM-AS1	0.00284131	0.0729484	0.361	0.278	1
POP4	0.00285688	0.100887	0.743	0.621	1
CEP57L1	0.0028672	0.0476383	0.445	0.336	1
PRR13	0.00289531	0.10312	0.962	0.926	1
TMEM128	0.00289644	0.0328341	0.27	0.19	1
PTS	0.00291691	0.0459926	0.417	0.32	1
ICAM2	0.00291819	-0.160985	0.652	0.644	1
METTL13	0.00293287	0.0464754	0.342	0.25	1
CETN3	0.00293591	0.0397362	0.354	0.263	1
RAP1GDS1	0.00295663	0.066818	0.649	0.516	1
POMC	0.00296365	0.0523874	0.307	0.228	1
ATG101	0.00297032	-0.129872	0.439	0.472	1
LINC00426	0.00297251	0.0253972	0.21	0.144	1
SDF4	0.00300432	-0.114137	0.724	0.725	1
DNAJA3	0.00300474	0.0427732	0.433	0.323	1
RCN2	0.00302209	-0.105596	0.166	0.227	1
TRIP6	0.00303056	0.0525322	0.304	0.228	1
HNRNPA1	0.00304311	0.0568675	1	0.997	1
CDK6	0.00304612	0.0788444	0.824	0.738	1
GMDS	0.00306882	-0.107751	0.219	0.28	1
LMBR1L	0.00306893	0.058824	0.348	0.262	1
AMDHD2	0.00307215	-0.116976	0.223	0.274	1
PRPS2	0.00308059	0.047346	0.602	0.483	1
SURF1	0.00310506	-0.135677	0.342	0.38	1
DDX39A	0.00317824	0.0924939	0.909	0.846	1
SSNA1	0.00318892	-0.122953	0.875	0.848	1
ADK	0.00318921	0.0540373	0.668	0.536	1
CBLB	0.00320067	-0.130398	0.373	0.423	1
SERINC3	0.00320366	0.0546951	0.708	0.583	1
DFFA	0.00322358	0.0616964	0.539	0.428	1
LPAR6	0.00322547	-0.131721	0.235	0.291	1
HVCN1	0.00323539	-0.0884914	0.141	0.202	1
PGGT1B	0.00325563	0.0343521	0.21	0.143	1
ZDHHC6	0.00326095	0.0708449	0.464	0.36	1
POM121	0.00326712	0.0362633	0.248	0.174	1
WDHD1	0.00328551	0.0658623	0.458	0.35	1
MOCS2	0.00329373	0.0440918	0.624	0.492	1
MRPL15	0.00329868	0.0564196	0.633	0.499	1
CCHCR1	0.00330071	0.0573384	0.354	0.268	1
COQ4	0.00330327	0.0374938	0.577	0.45	1
CUL4B	0.00331274	0.0255239	0.216	0.15	1
CCDC115	0.00333536	0.058781	0.583	0.456	1
ALG1	0.00333949	0.0211184	0.288	0.204	1
TCAF1	0.00334262	0.0363336	0.292	0.21	1
FUNDC1	0.00334691	0.0313606	0.345	0.255	1
TMEM14A	0.00335485	0.070181	0.549	0.447	1
EWSR1	0.00335949	0.0847121	0.931	0.886	1
NCAPG	0.0033702	0.0585198	0.639	0.523	1
POLL	0.00338938	0.016295	0.351	0.251	1
EMC9	0.00339659	0.0647956	0.643	0.532	1
SRP19	0.00339731	-0.147586	0.596	0.58	1
A1BG	0.00340128	-0.158609	0.599	0.596	1
PMS1	0.00340513	0.034183	0.386	0.289	1
APOBEC3H	0.00340845	0.0666424	0.721	0.603	1
PLIN2	0.00342499	0.177194	0.828	0.736	1
ISCA1	0.00345829	0.0514504	0.599	0.474	1
PLPP5	0.0034663	0.028518	0.398	0.29	1
LBH	0.00347246	-0.153801	0.486	0.52	1
POLM	0.00347264	0.0261174	0.307	0.22	1
C1orf35	0.00350712	0.0416001	0.658	0.529	1
LPXN	0.00351434	-0.120023	0.796	0.768	1
TNFAIP3	0.00351931	-0.197112	0.304	0.352	1
STARD3NL	0.00352423	0.0582219	0.577	0.477	1
ADGRE5	0.0035257	-0.137157	0.743	0.752	1
ZNF346	0.00354372	0.0272469	0.251	0.177	1
DLAT	0.00355137	0.0275565	0.304	0.216	1
SAC3D1	0.00357017	-0.177102	0.182	0.231	1
STIM1	0.00358655	-0.126304	0.339	0.385	1
YIF1B	0.00358889	0.0918928	0.875	0.79	1
RNPS1	0.00359125	0.0823117	0.934	0.886	1
RPS19BP1	0.00359233	-0.135814	0.871	0.834	1
C1orf174	0.00361154	0.039198	0.445	0.339	1
ATP5PD	0.00361284	-0.109531	0.956	0.931	1
AL118516.1	0.00361622	0.0365995	0.213	0.15	1
TMEM87B	0.00363015	0.0343074	0.386	0.289	1
KIF1BP	0.00364284	0.0244809	0.201	0.138	1
ARPC5	0.00364388	-0.133888	0.975	0.965	1
TBC1D9B	0.00364493	0.0336214	0.332	0.244	1
MT3	0.00366708	0.123988	0.219	0.157	1
COPS7B	0.00367492	0.0531742	0.433	0.336	1
AC004585.1	0.00372387	0.056929	0.251	0.181	1
CENPM	0.00373799	0.0731482	0.884	0.759	1
SPN	0.00373932	-0.132468	0.799	0.783	1
RANBP9	0.00374153	0.0277578	0.226	0.156	1
PRKAR1B	0.00377071	-0.116814	0.226	0.276	1
MIIP	0.00379867	-0.122189	0.561	0.594	1
IBTK	0.00380912	0.033498	0.442	0.323	1
TBL2	0.00381217	0.0294995	0.307	0.224	1
STAMBPL1	0.00381747	0.0463352	0.508	0.39	1
RWDD1	0.00381904	-0.13607	0.871	0.876	1
IMPDH1	0.00385459	-0.131216	0.464	0.491	1
ZBTB17	0.00385544	0.0449587	0.266	0.193	1
ANKRD10	0.00386087	0.0744038	0.724	0.574	1
SLC25A11	0.00386265	-0.123038	0.771	0.733	1
HSD17B11	0.00387974	0.0804292	0.611	0.505	1
CASP8	0.00388334	0.0166013	0.545	0.419	1
TOR1B	0.00388379	0.0436932	0.313	0.23	1
HMGXB3	0.00388561	0.0460245	0.386	0.288	1
NIPSNAP3A	0.00388874	0.0347307	0.361	0.267	1
ATP8B3	0.00389159	0.0316599	0.266	0.193	1
[truncated: 4,371 more rows]
